# Supplementary material
Source: PubMed Central journal article supplement (PMC3525752)
Supplement: NIHMS427696-supplement-01.pdf [file NIHMS427696-supplement-01.pdf]

# Structure-Activity Relationships of Antitubercular Salicylanilides Consistent with Disruption of the Proton Gradient via Proton Shuttling

Ill-Young Lee<sup>a†</sup>, Todd D. Gruber<sup>b†</sup>, Amanda Samuels<sup>b</sup>, Minhan Yun<sup>a</sup>, Bora Nam<sup>a</sup>, Minseo Kang<sup>a</sup>,  
Katherine Crowley<sup>b</sup>, Benjamin Winterroth<sup>b</sup>, Helena I. Boshoff<sup>b</sup>, and Clifton E. Barry, III<sup>b,\*</sup>

---

\* Corresponding author. Tel.: +1-301-435-7509; fax: +1-301-480-5705; e-mail: cbarry@niaid.nih.gov

SpinWorks 2.4: KRT1041

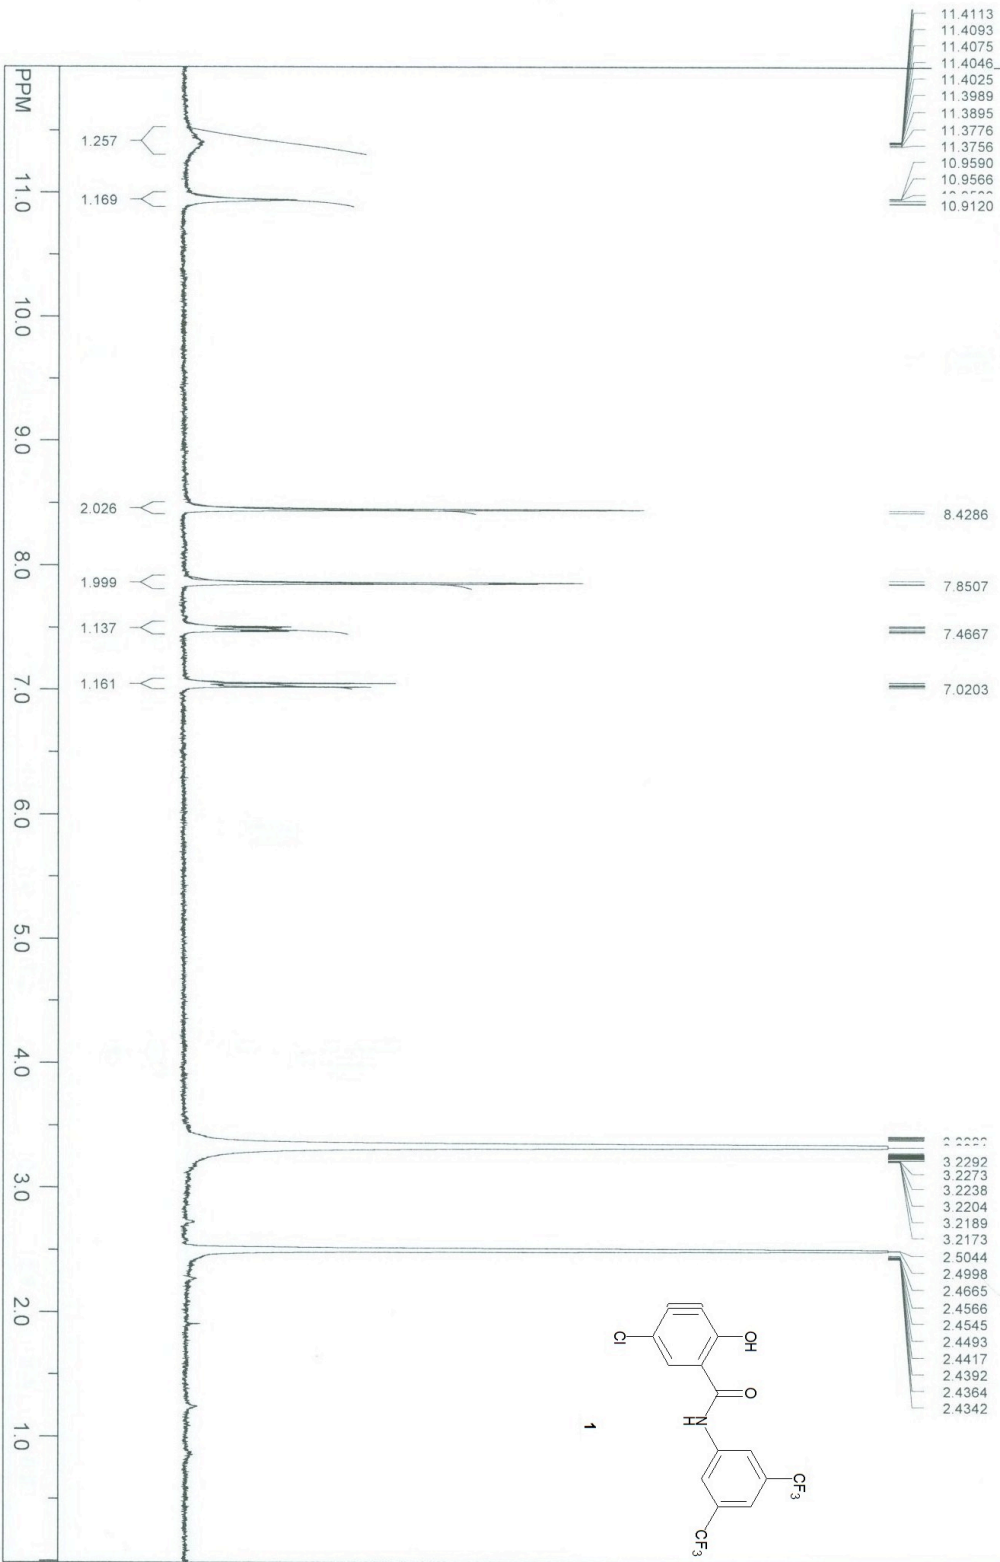

file: C:\E\KRT1041.fid\td block# 1 expt: "s2pu"  
 transmitter freq: 299.950076 MHz  
 time domain size: 19698 points  
 width: 4807.69 Hz = 16.028308 ppm = 0.244070 Hz/pt  
 number of scans: 8

freq. of 0 ppm: 299.948272 MHz  
 processed size: 65536 complex points  
 LB: 0.200 GB: 0.0000  
 Hz/cm: 144.357 ppm/cm: 0.48127

SpinWorks 2.4: KRT1049

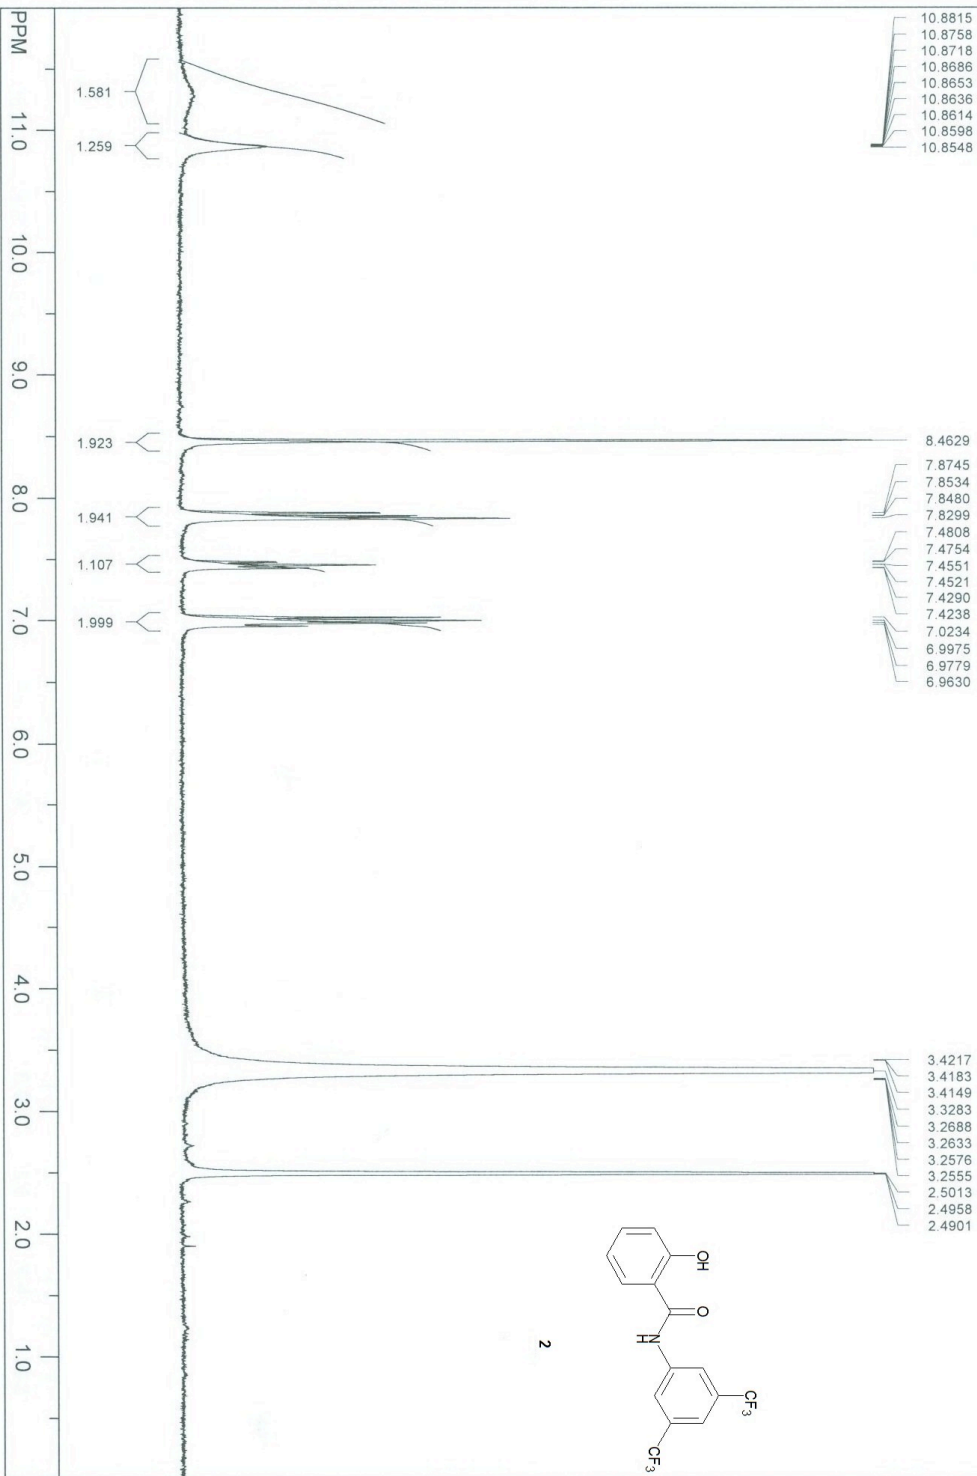

file: C:\man\KRT1049.fid\fid block# 1 exp: "s2pul"

transmitter freq.: 299.950076 MHz

time domain size: 19698 points

width: 4807.69 Hz = 16.028308 ppm = 0.244070 Hz/pt

number of scans: 8

freq. of 0 ppm: 299.948281 MHz

processed size: 65536 complex points

LB: 0.200 GB: 0.0000

HZ/cm: 144.021 ppm/cm: 0.48015

SpinWorks 2.4: KRT1167

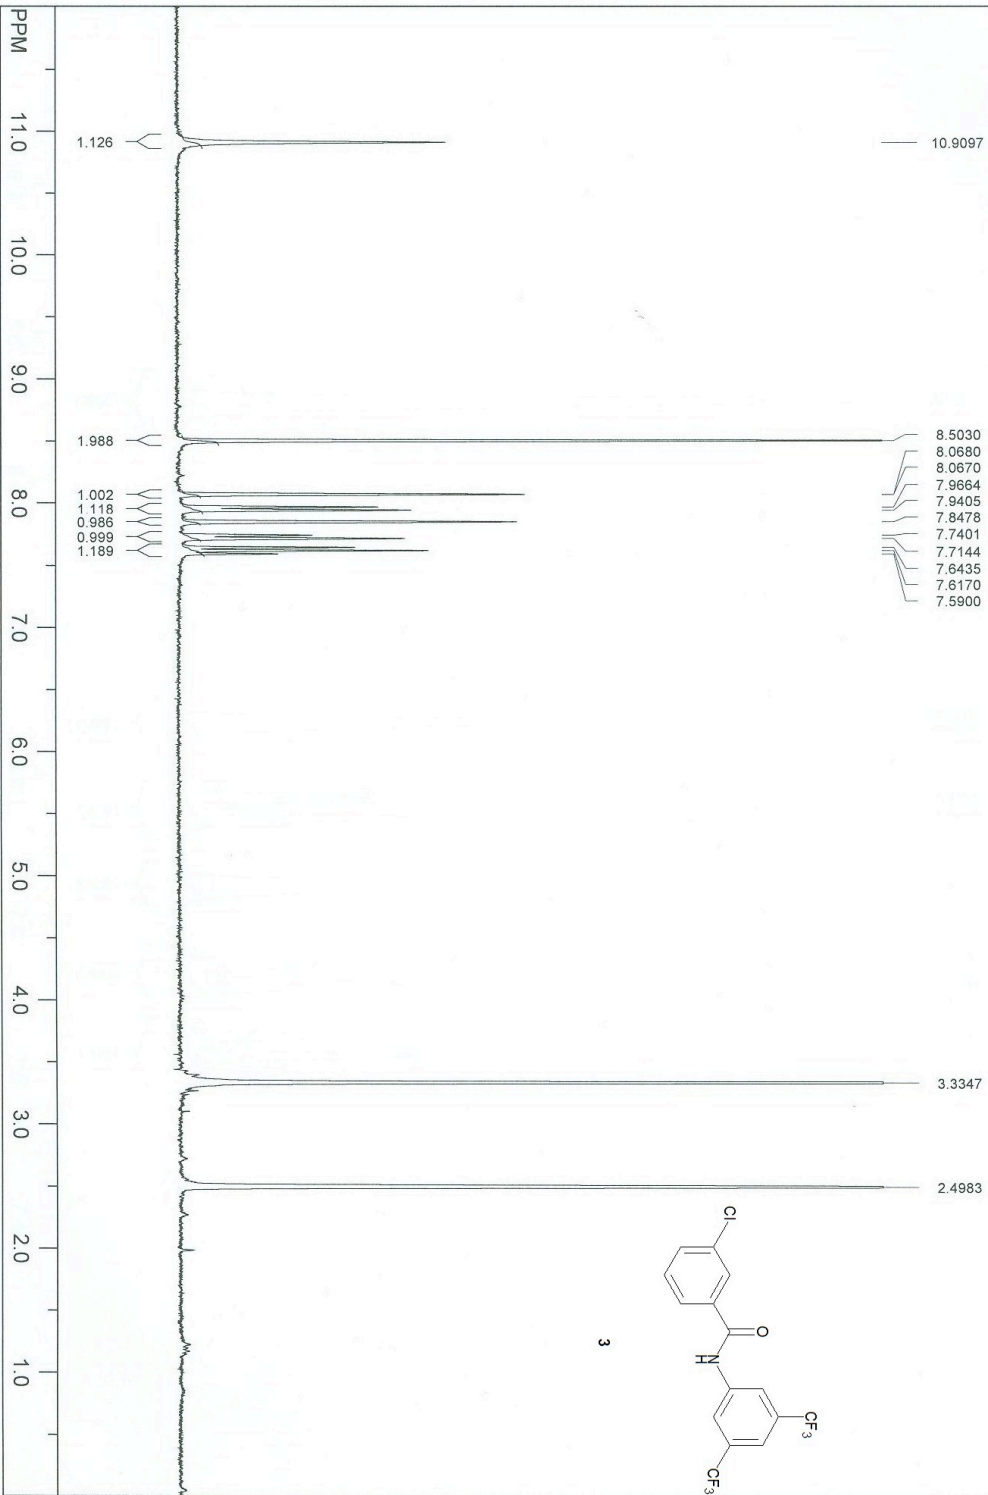

file: C:\min\KRT1167\h1\h1d block# 1 exp1: "s2pu1"  
 transmitter freq.: 299.950076 MHz  
 time domain size: 19698 points  
 width: 4807.69 Hz = 16.028308 ppm = 0.244070 Hz/pt  
 number of scans: 8

freq. of 0 ppm: 299.948194 MHz  
 processed size: 65536 complex points  
 LB: 0.200 GB: 0.0000  
 Hz/cm: 144.021 ppm/cm: 0.48015

SpinWorks 2.4: KRT1023

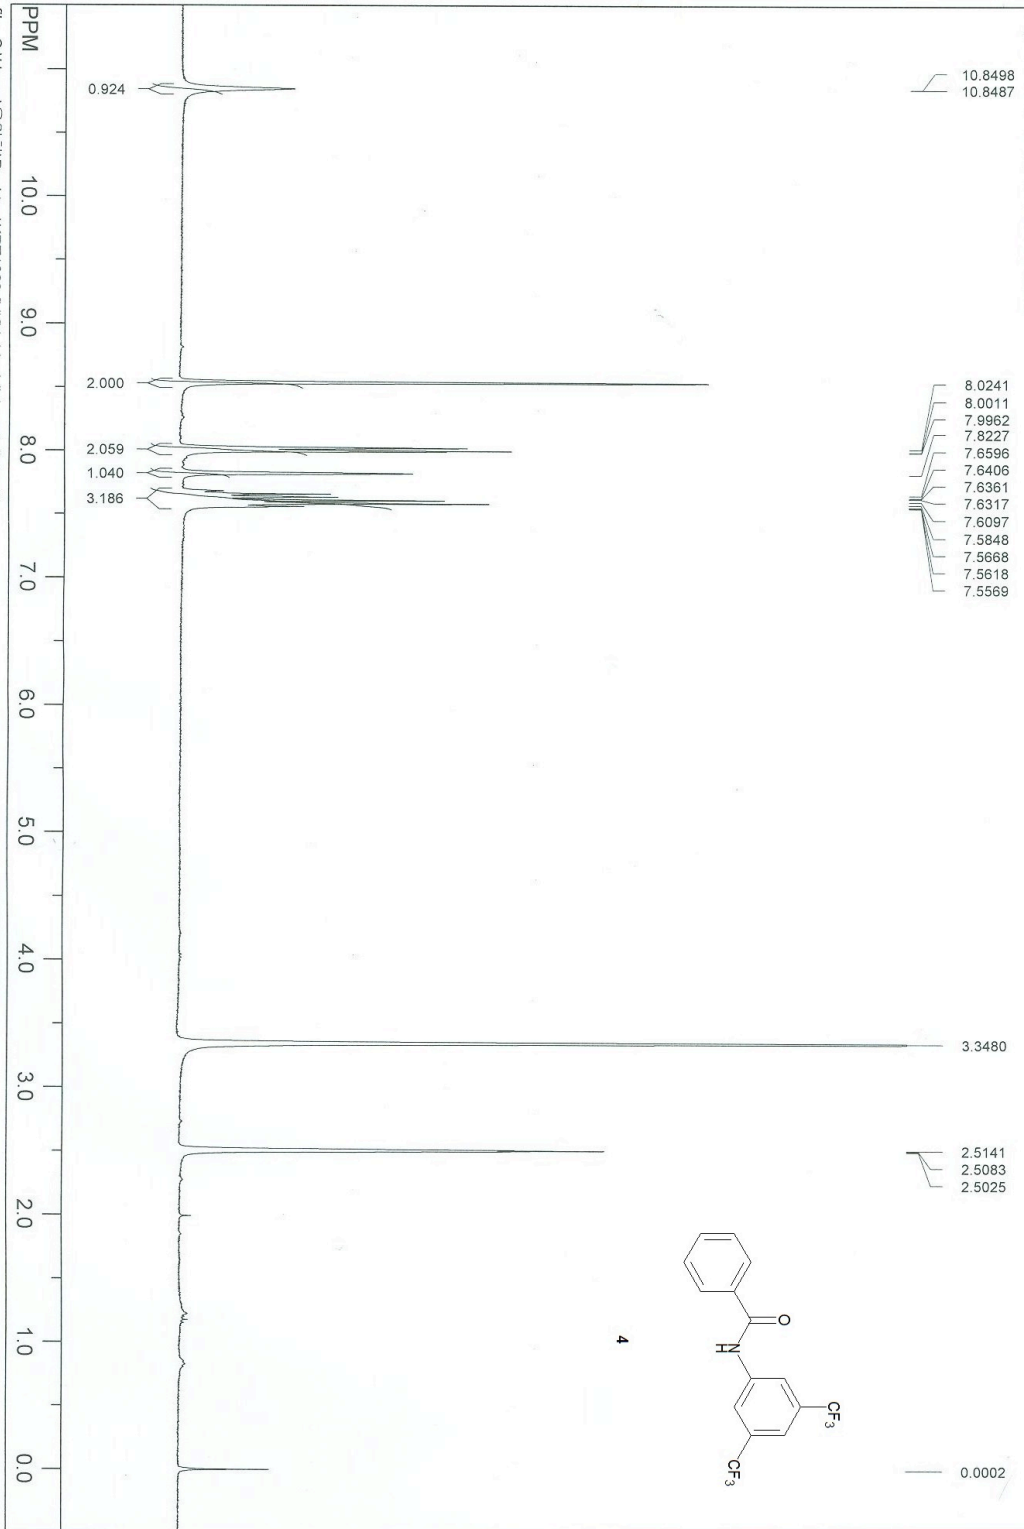

file: C:\Users\문민환\Desktop\KRT1023.fid\fid block# 1 exp# "2pul"  
 transmitter freq.: 299.970271 MHz  
 time domain size: 19698 points  
 width: 4807.69 Hz = 16.027229 ppm = 0.244070 Hz/pt  
 number of scans: 32

freq. of 0 ppm: 299.968467 MHz  
 processed size: 65536 complex points  
 LB: 0.000 GB: 0.0000  
 Hz/cm: 144.005 ppm/cm: 0.48006

KR11839

File: Proton  
Pulse Sequence: szpu1

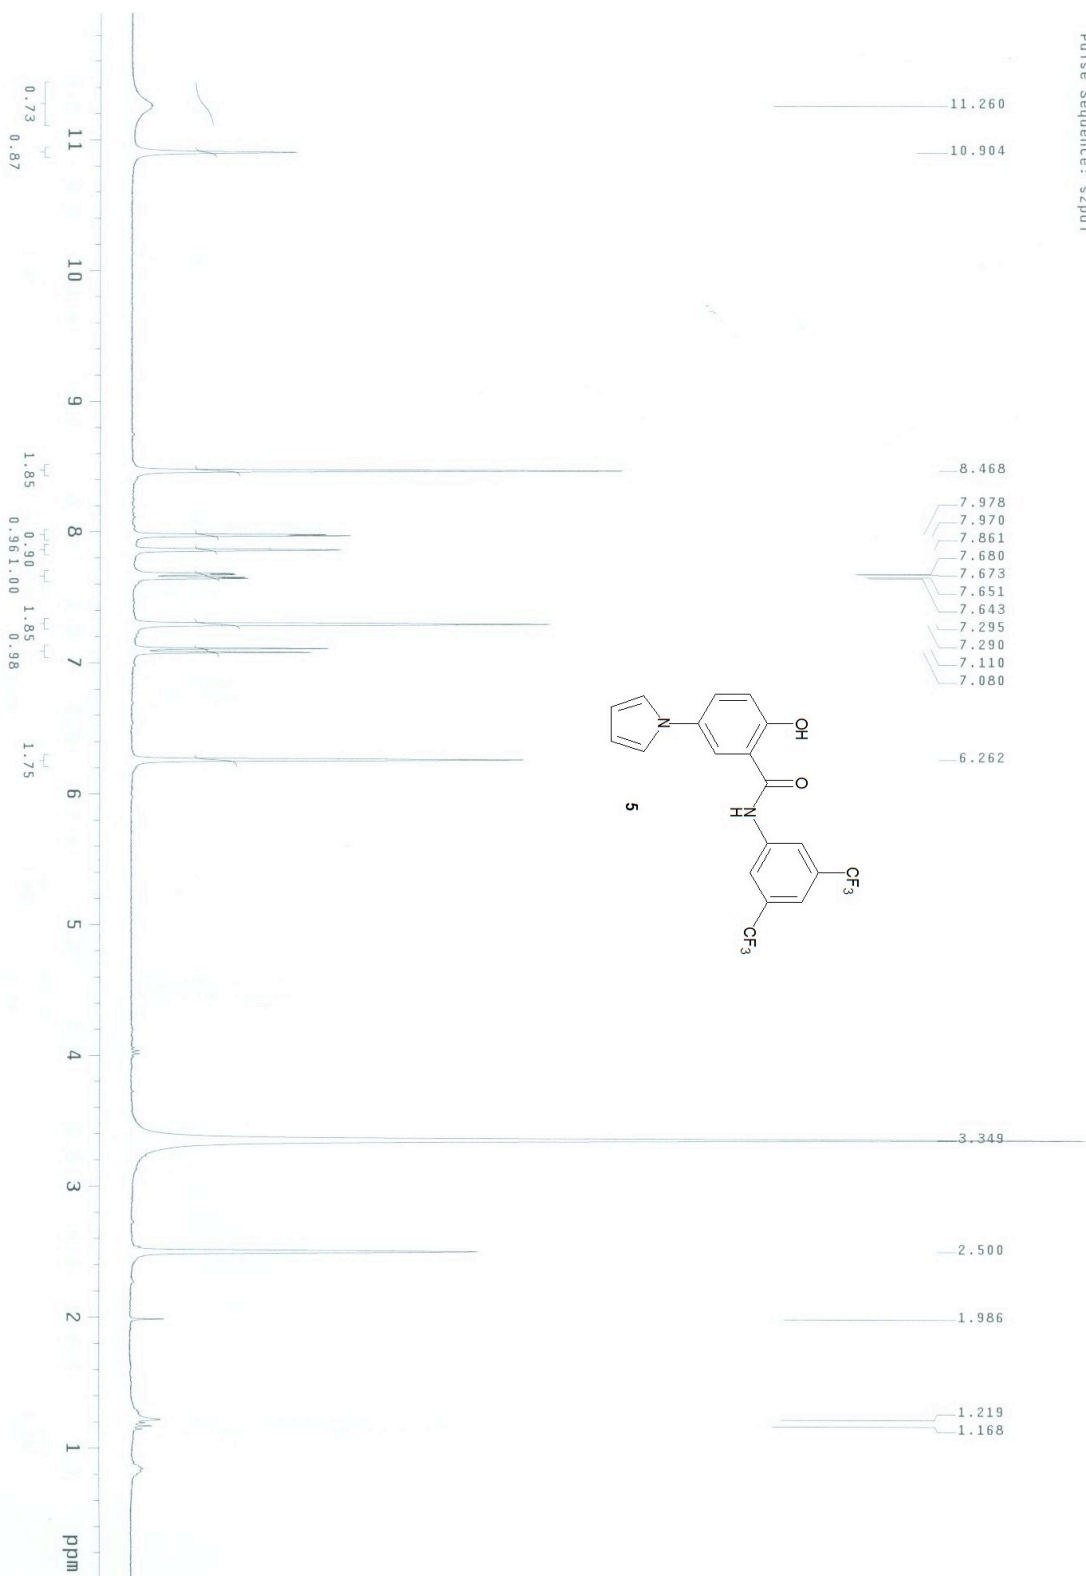

SpinWorks 2.4: KRT1047-2-DMSO

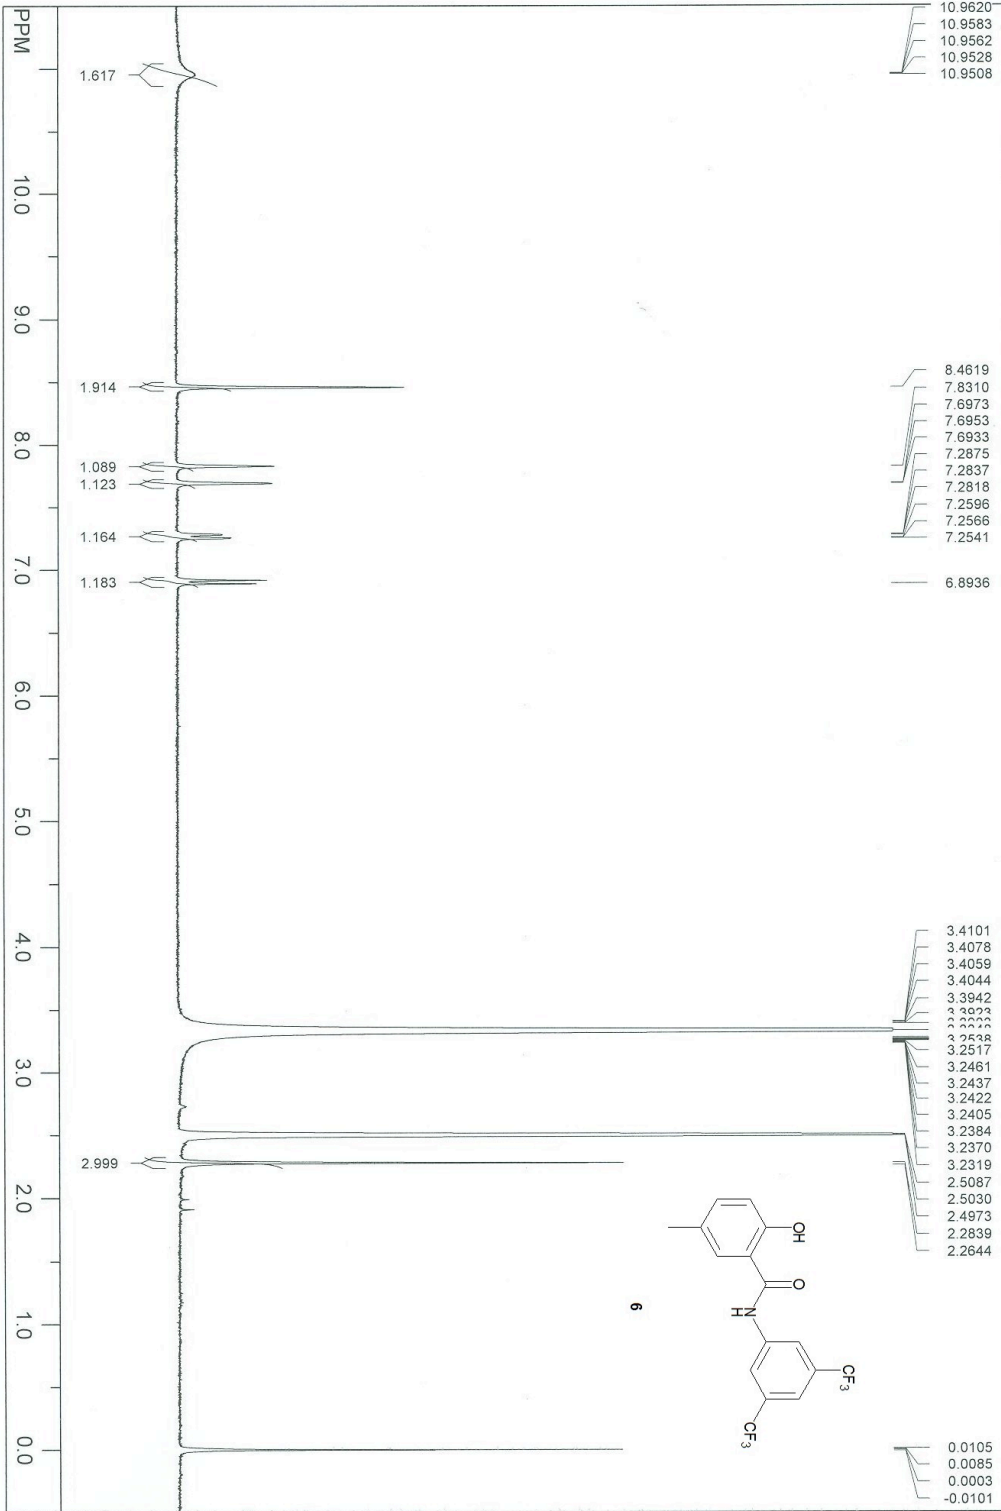

file: C:\Users\공민환\Desktop\KRT1047-2-DMSO-121006.fid\fid block# 1 exp# "szpul"  
 transmitter freq.: 299.970271 MHz  
 time domain size: 19698 points  
 width: 4807.69 Hz = 16.027229 ppm = 0.244070 Hz/pt  
 number of scans: 64

freq. of 0 ppm: 299.968469 MHz  
 processed size: 65536 complex points  
 LB: 0.000 GB: 0.0000  
 Hz/cm: 144.004 ppm/cm: 0.48006

SpinWorks 2.4: KRT1182-1

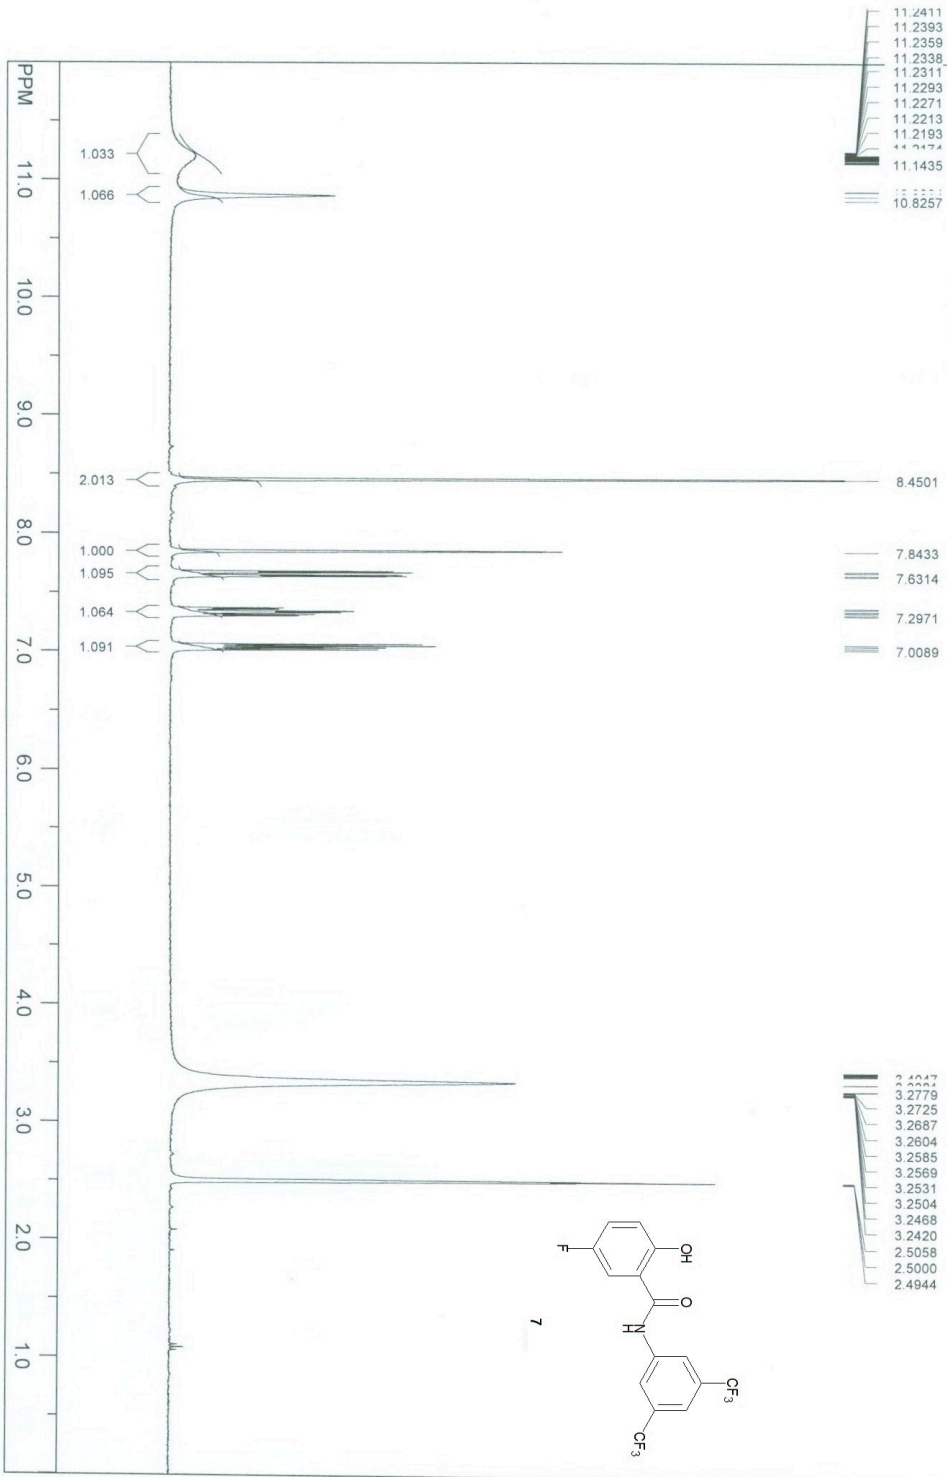

file: C:\min\KRT1182-1\fid\block#1 expt "s2pu"  
 transmitter freq: 299.950076 MHz  
 time domain size: 19698 points  
 width: 4807.69 Hz = 16.028308 ppm = 0.244070 Hz/pt  
 number of scans: 8

freq. of 0 ppm: 299.948272 MHz  
 processed size: 65536 complex points  
 LB: 0.200 GB: 0.0000  
 Hz/cm: 144.021 ppm/cm: 0.48015



SpinWorks 2.4: KRT1172

11.4347  
11.4331  
11.4291  
11.4248  
11.4220  
11.4201  
11.4171  
11.4120

10.8547

8.4404

7.9823  
7.9739  
7.8470  
7.8457  
7.6186  
7.6102  
7.5894  
7.5808  
7.0019  
6.9726

3.3268

2.5102  
2.5047  
2.4989  
2.4934

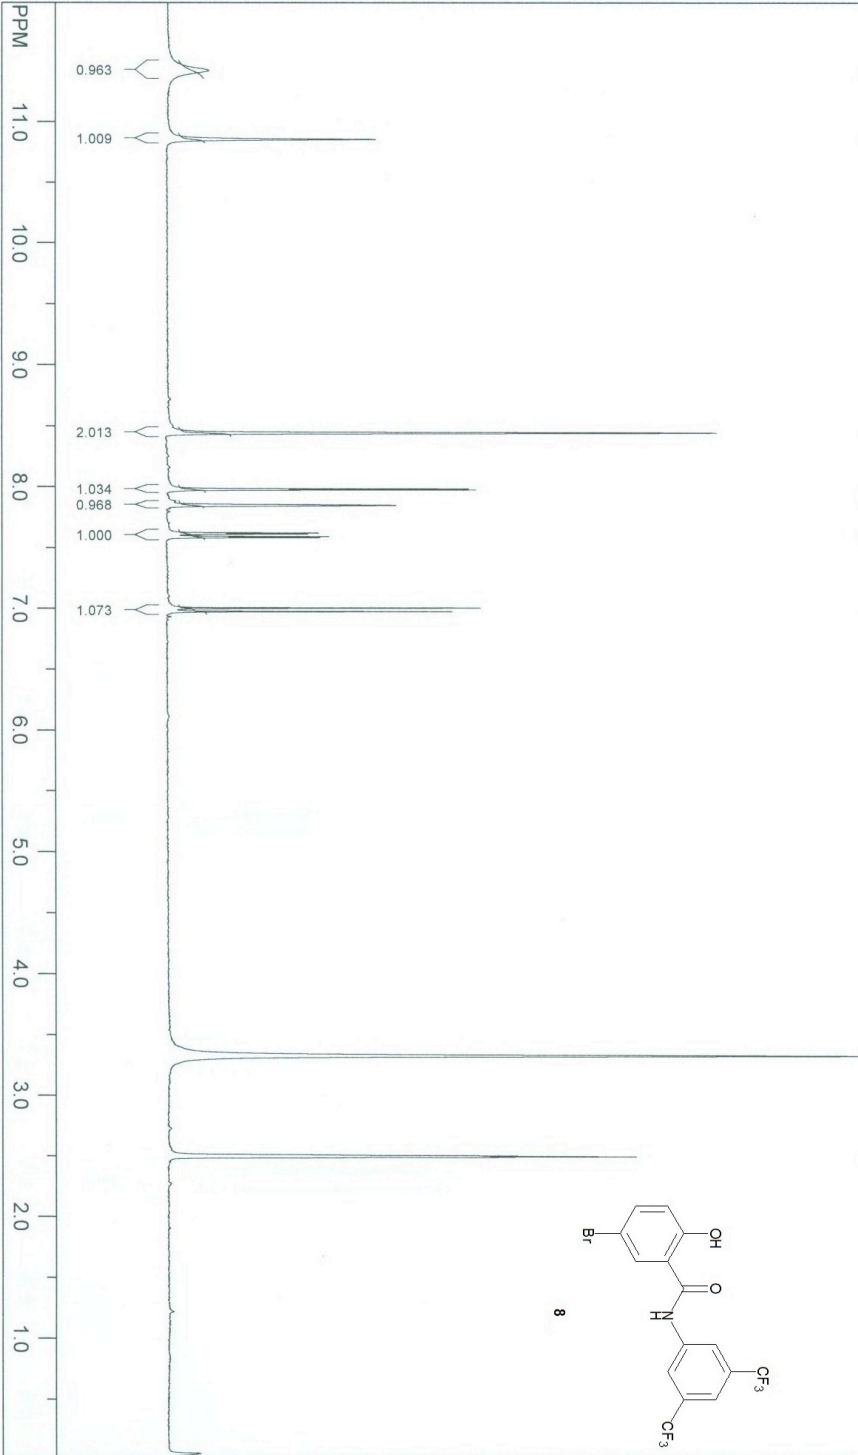

file: C:\data\KRT1172\fid\fid block# 1 expt: "s2pu1"  
transmitter freq.: 299.950076 MHz  
time domain size: 19698 points  
width: 4807.69 Hz = 16.028308 ppm = 0.244070 Hz/pt  
number of scans: 8

freq. of 0 ppm: 299.948272 MHz  
processed size: 65536 complex points  
LB: 0.200 GB: 0.0000  
Hz/cm: 143.518 ppm/cm: 0.47847

SpinWorks 2.4: KRT1186

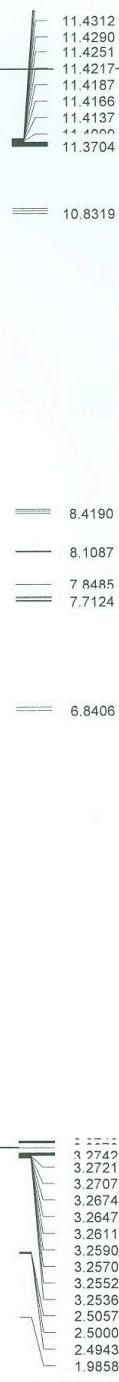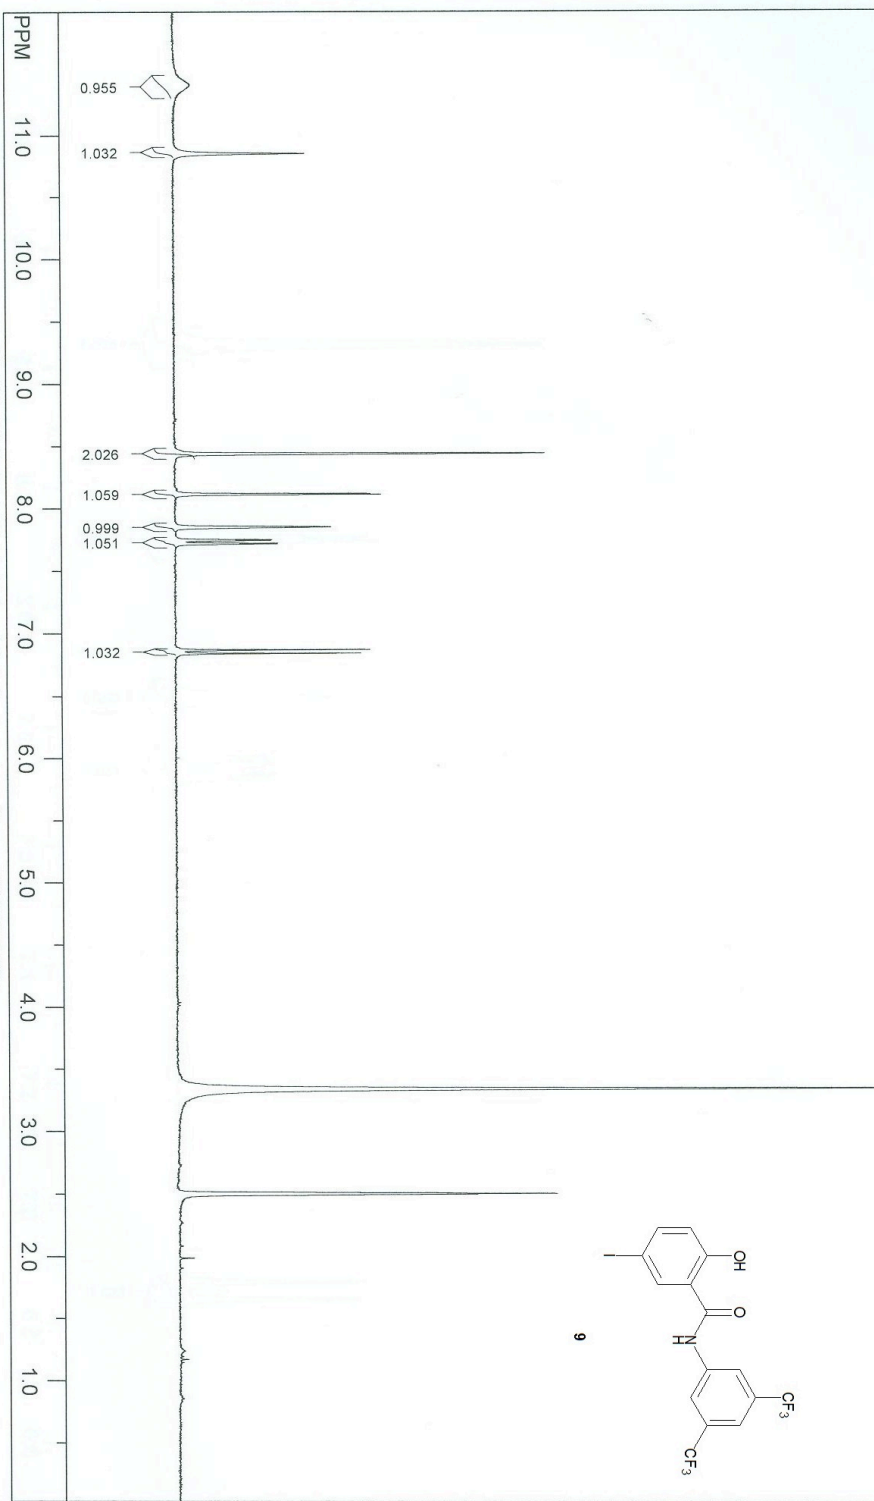

file: C:\Documents and Settings\김영중\104호\바탕 화면\김영중\KRT1186\block# 1 exp1 '\*szpu'  
 transmitter freq.: 299.950076 MHz  
 time domain size: 19698 points  
 width: 4807.69 Hz = 16.028308 ppm = 0.244070 Hz/pt  
 number of scans: 8  
 freq. of 0 ppm: 299.948275 MHz  
 processed size: 65536 complex points  
 LB: 0.000 GB: 0.0000  
 Hz/cm: 143.590 ppm/cm: 0.47871

SpinWorks 2.4: KRT1062

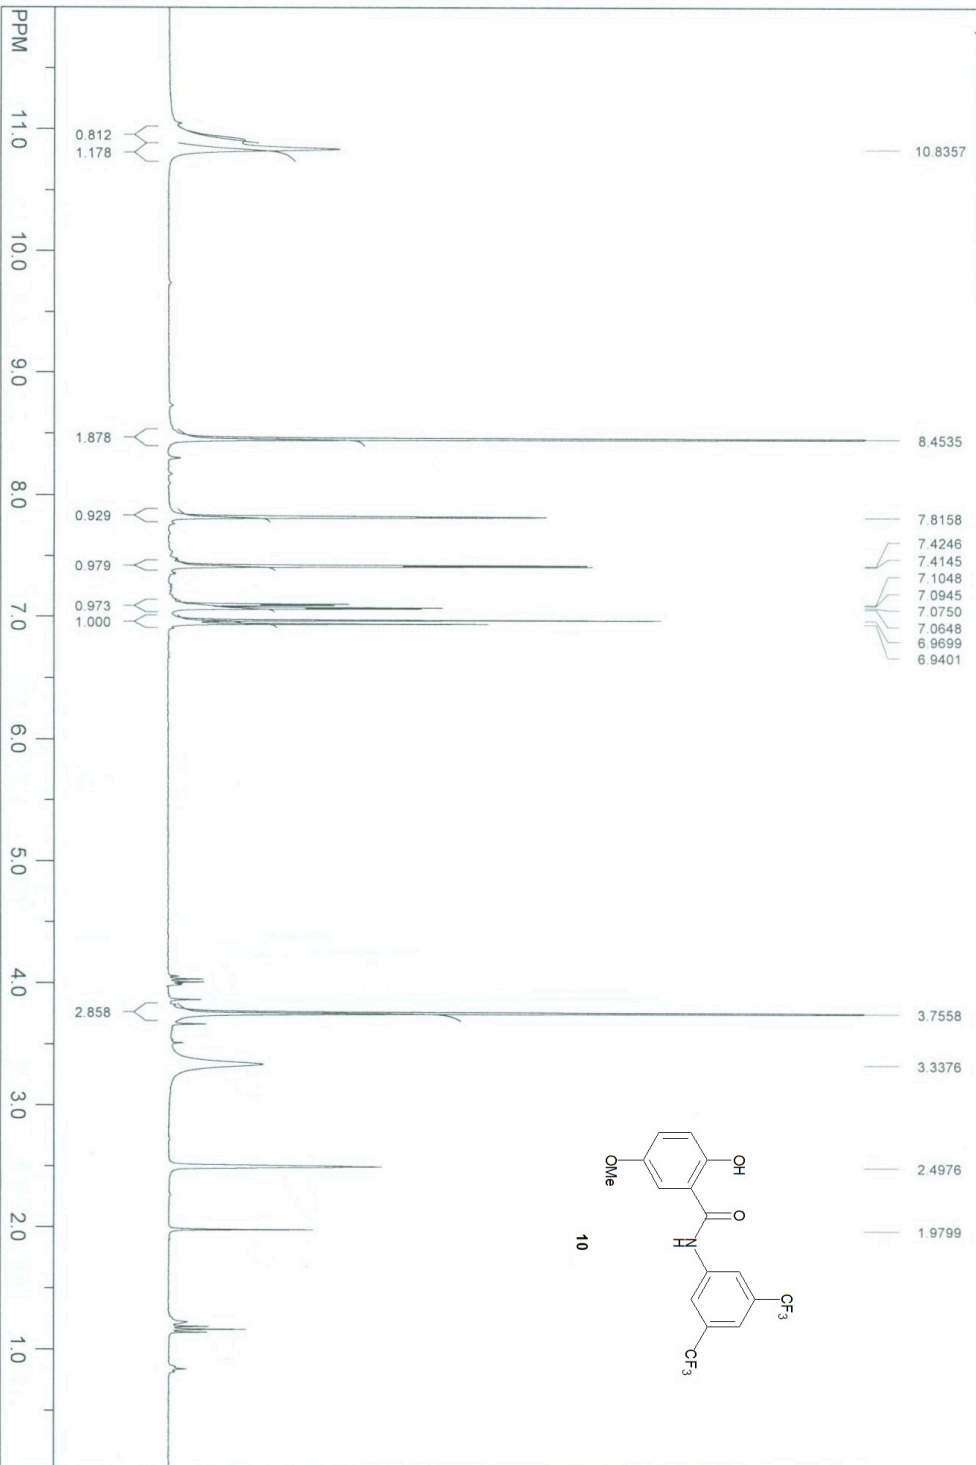

file: C:\NMR\KRT1062.fid\fid block# 1 expt "s2pur"  
transmitter freq.: 299.950076 MHz  
time domain size: 19698 points  
width: 4807.69 Hz = 16.028308 ppm = 0.244070 Hz/pt  
number of scans: 8

freq. of 0 ppm: 299.946280 MHz  
processed size: 65536 complex points  
LB: 0.200 GB: 0.0000  
Hz/cm: 143.854 ppm/cm: 0.47959

SpinWorks 2.4: KRT1046

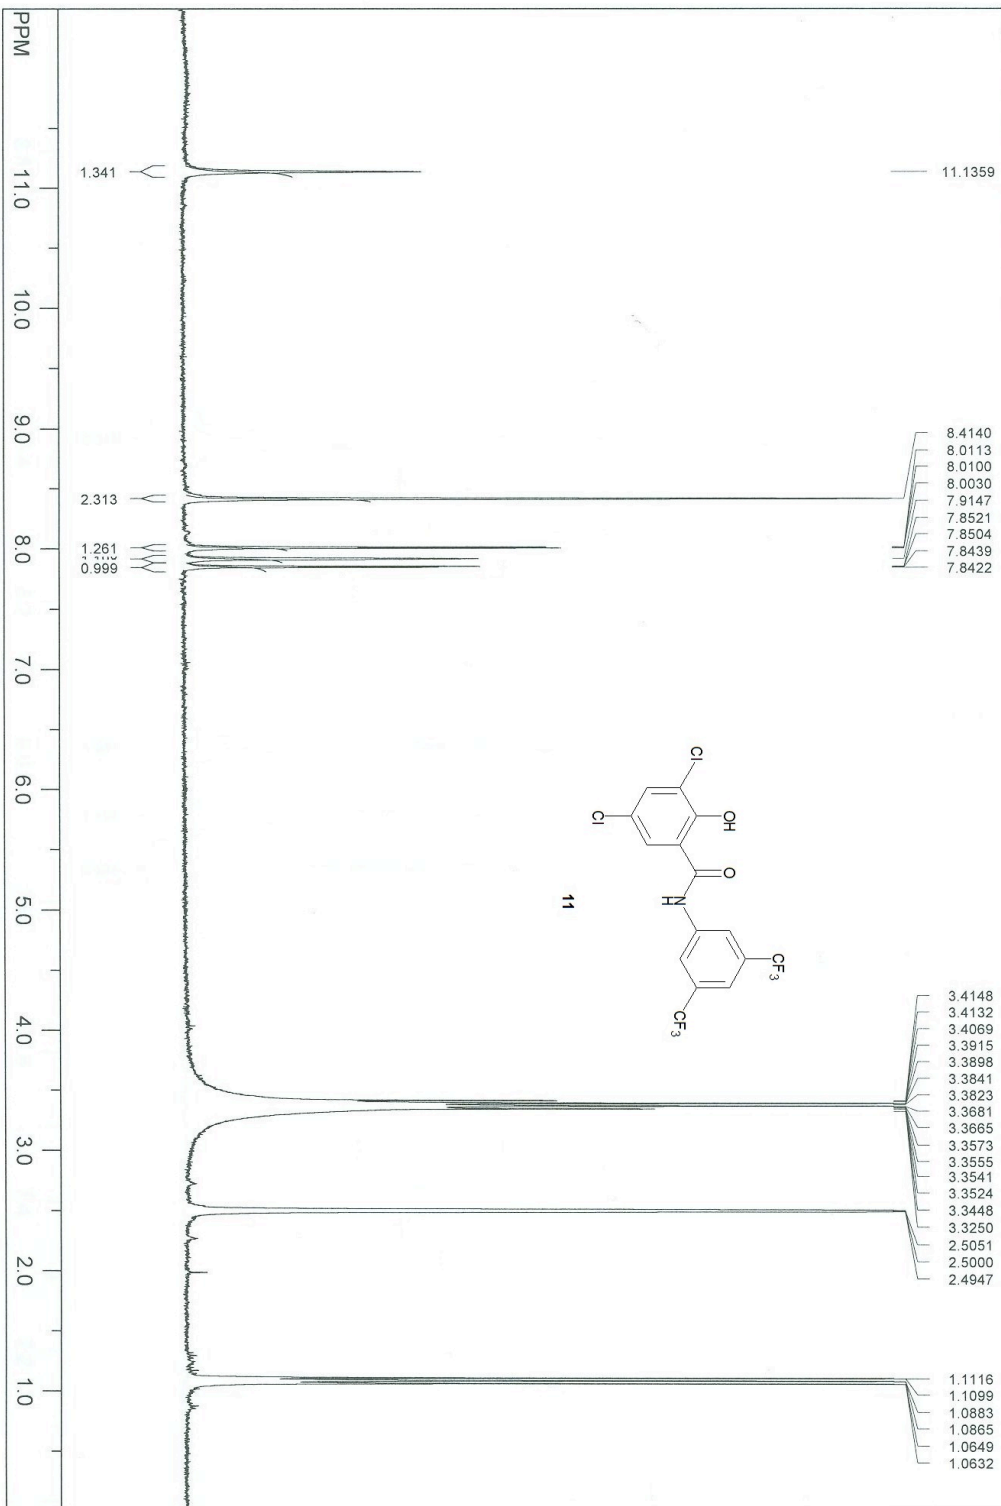

file: C:\인원\KRT1046.fid\fid\_block# 1 exp1: "s2pu1"  
 transmitter freq.: 299.950076 MHz  
 time domain size: 19698 points  
 width: 4807.69 Hz = 16.028308 ppm = 0.244070 Hz/pl  
 number of scans: 8

freq. of 0 ppm: 299.948280 MHz  
 processed size: 65536 complex points  
 LB: 0.200 GB: 0.0000  
 Hz/cm: 149.722 ppm/cm: 0.49916

SpinWorks 2.4: N-294

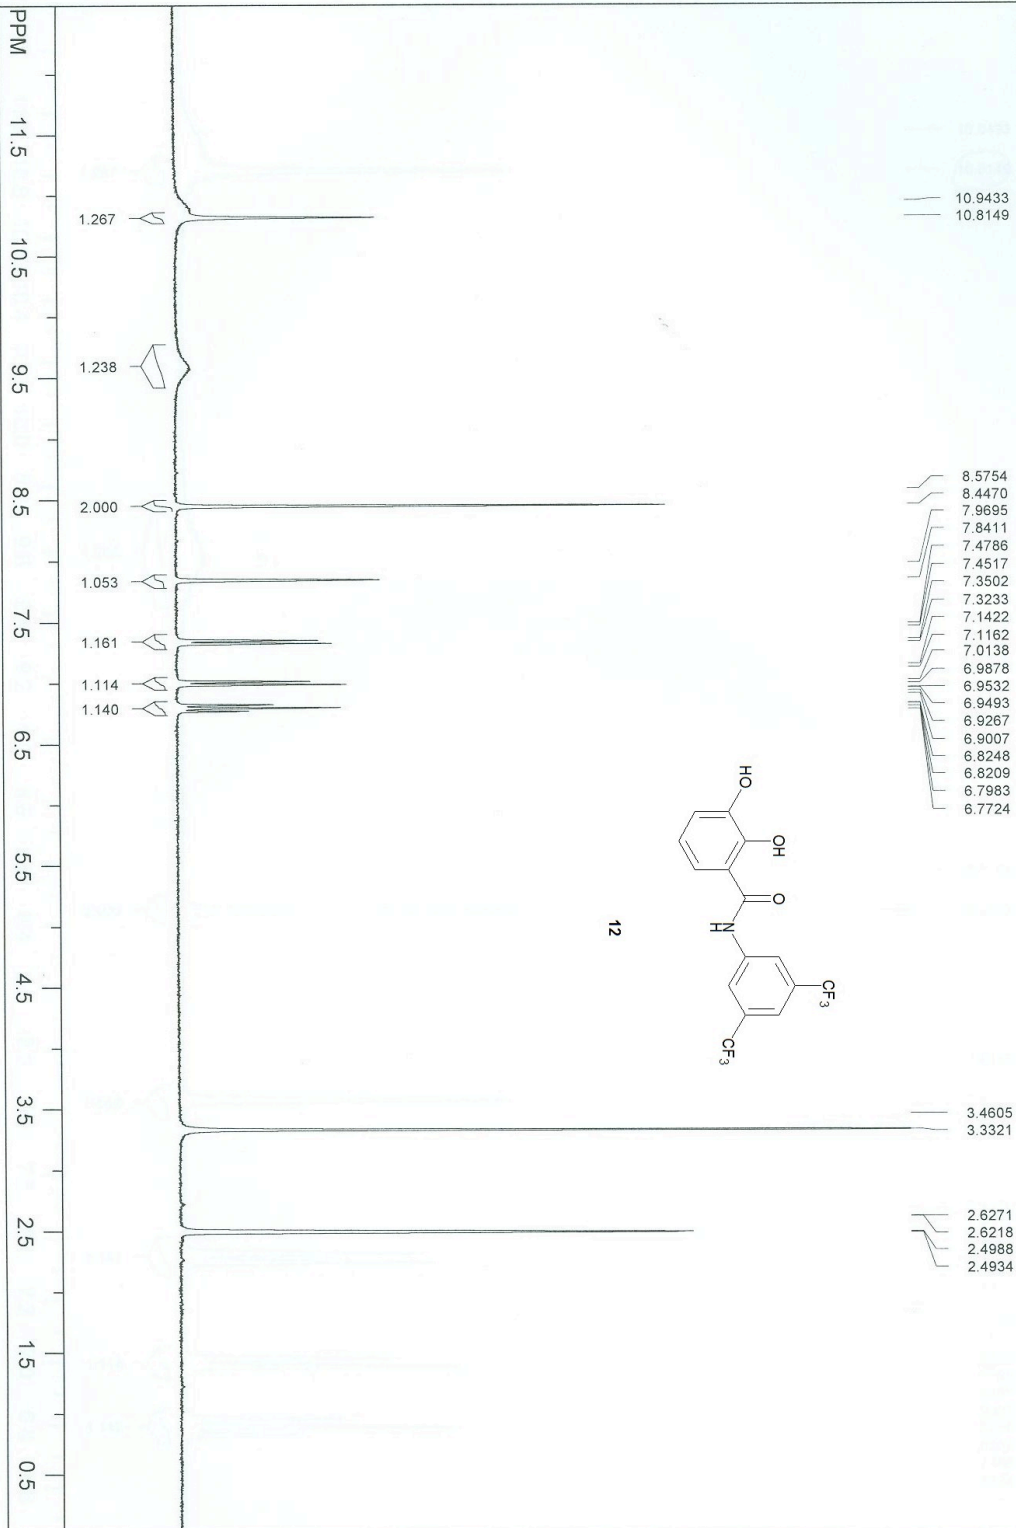

file: D:\남보리\N-294.fid\fid block# 1 exp1: "s2pu1"  
 transmitter freq.: 299.970343 MHz  
 time domain size: 19698 points  
 width: 4807.69 Hz = 16.027225 ppm = 0.244070 Hz/pt  
 number of scans: 8

freq. of 0 ppm: 299.968581 MHz  
 processed size: 65536 complex points  
 LB: 0.200 GB: 0.0000  
 Hz/cm: 150.528 ppm/cm: 0.50181

SpinWorks 2.4: N-295

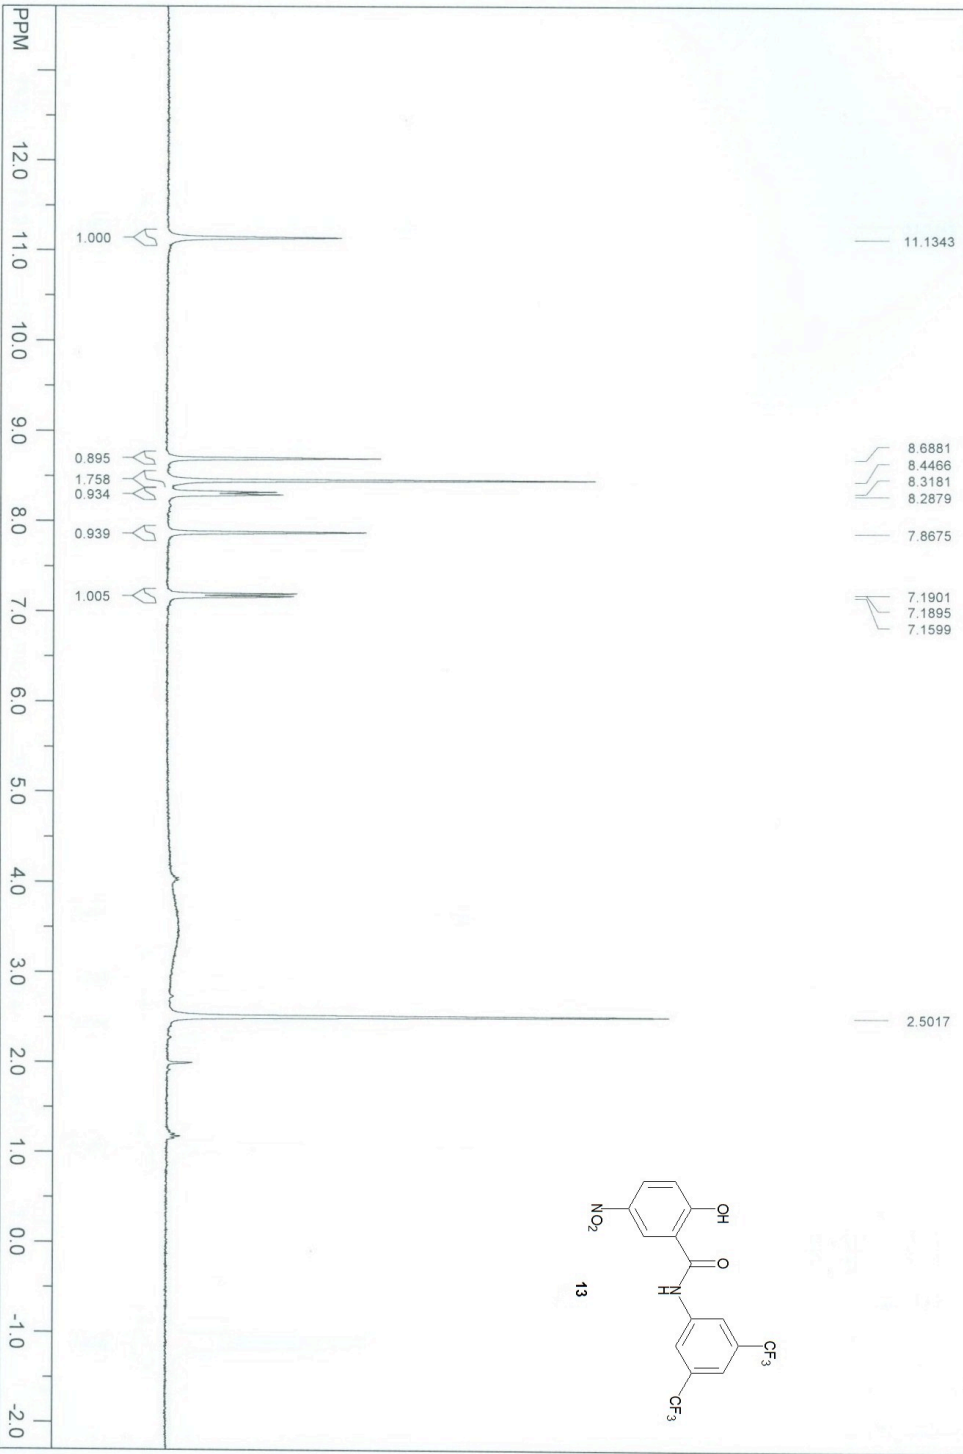

file: D:\남보리\N-295.fid\fid block# 1 expt. "szpu"  
transmitter freq.: 299.970343 MHz  
time domain size: 19698 points  
width: 4807.69 Hz = 16.027225 ppm = 0.244070 Hz/pt  
number of scans: 8

freq. of 0 ppm: 299.968630 MHz  
processed size: 65536 complex points  
LB: 0.000 GB: 0.0000  
Hz/cm: 192.308 ppm/cm: 0.64109

N-260-DMSO

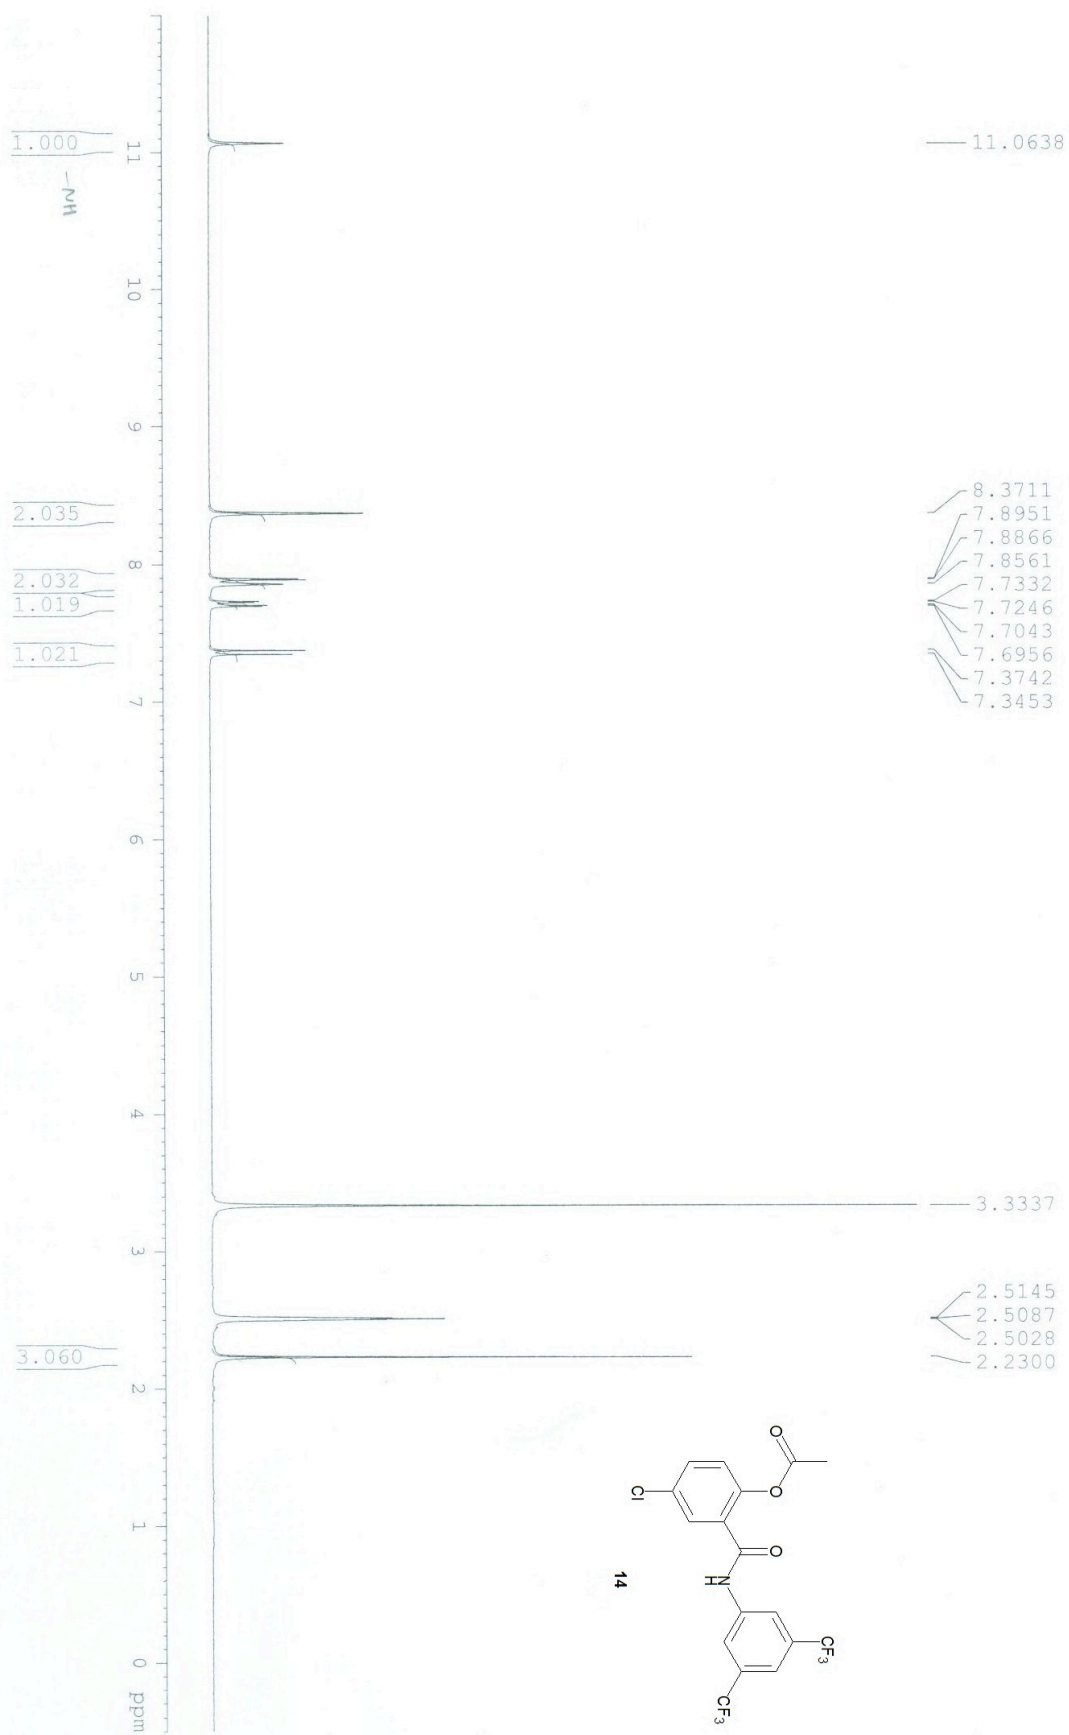

SpinWorks 2.4: KRT1178

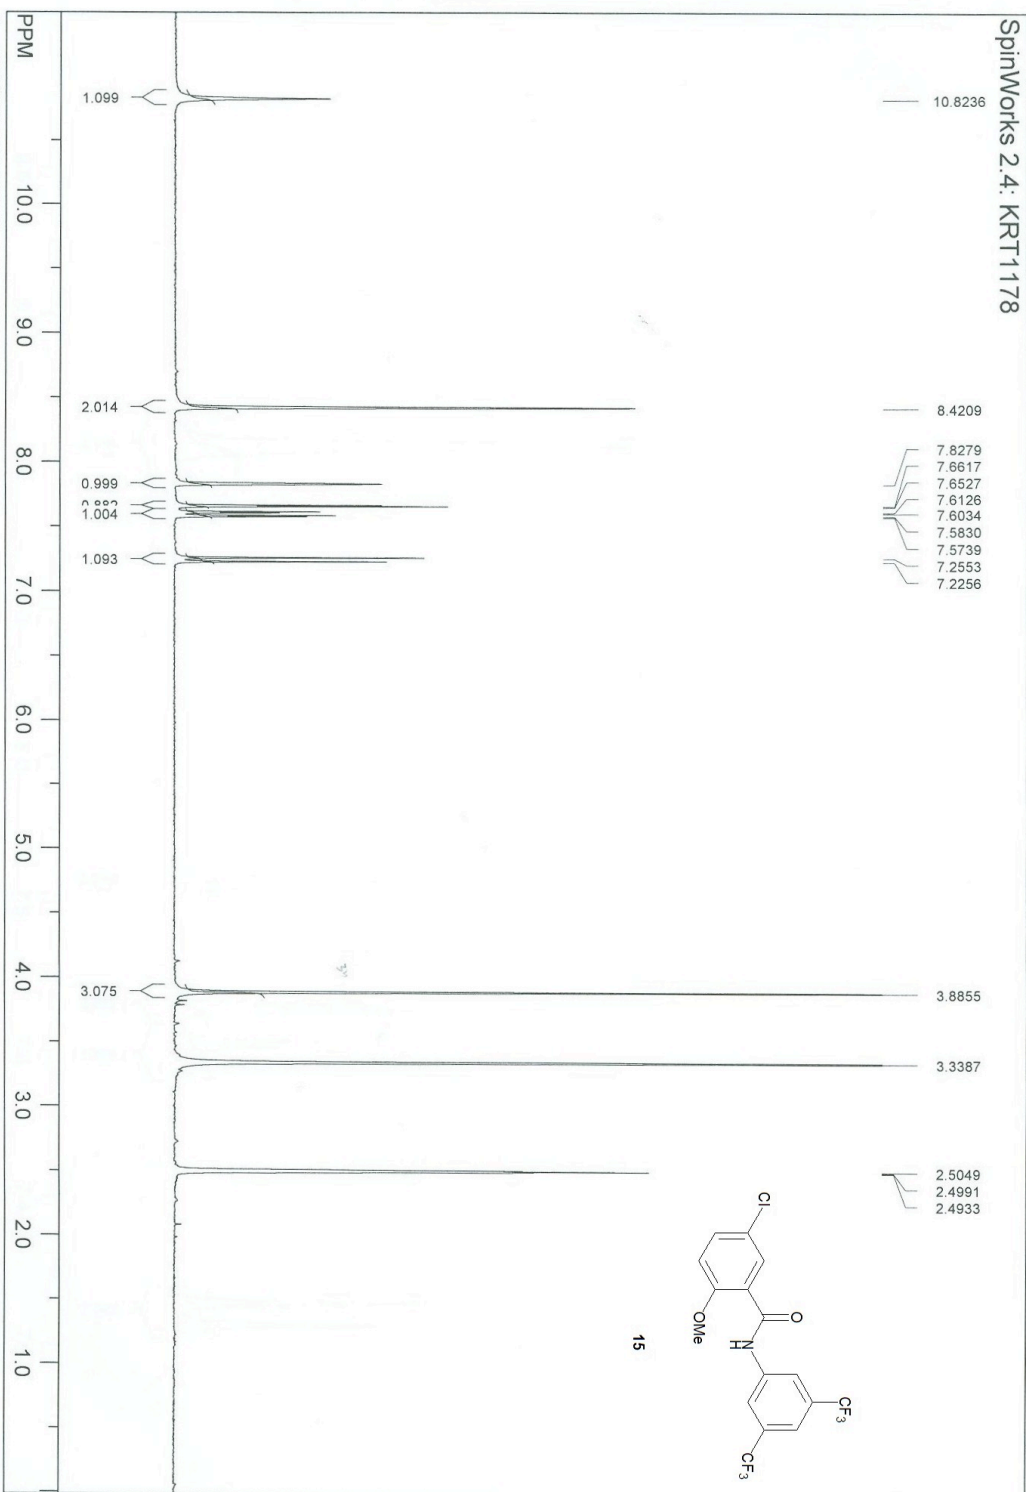

file: C:\M\KRT1178.fid\fid block# 1 exp: "s2pu"  
 transmitter freq: 299.950076 MHz  
 time domain size: 19698 points  
 width: 4807.69 Hz = 16.028308 ppm = 0.244070 Hz/pt  
 number of scans: 8

freq. of 0 ppm: 299.948273 MHz  
 processed size: 65536 complex points  
 LB: 0.200 GB: 0.0000  
 Hz/cm: 138.153 ppm/cm: 0.46059



SpinWorks 2.4: N-261-1 - <sup>1</sup>HMSD

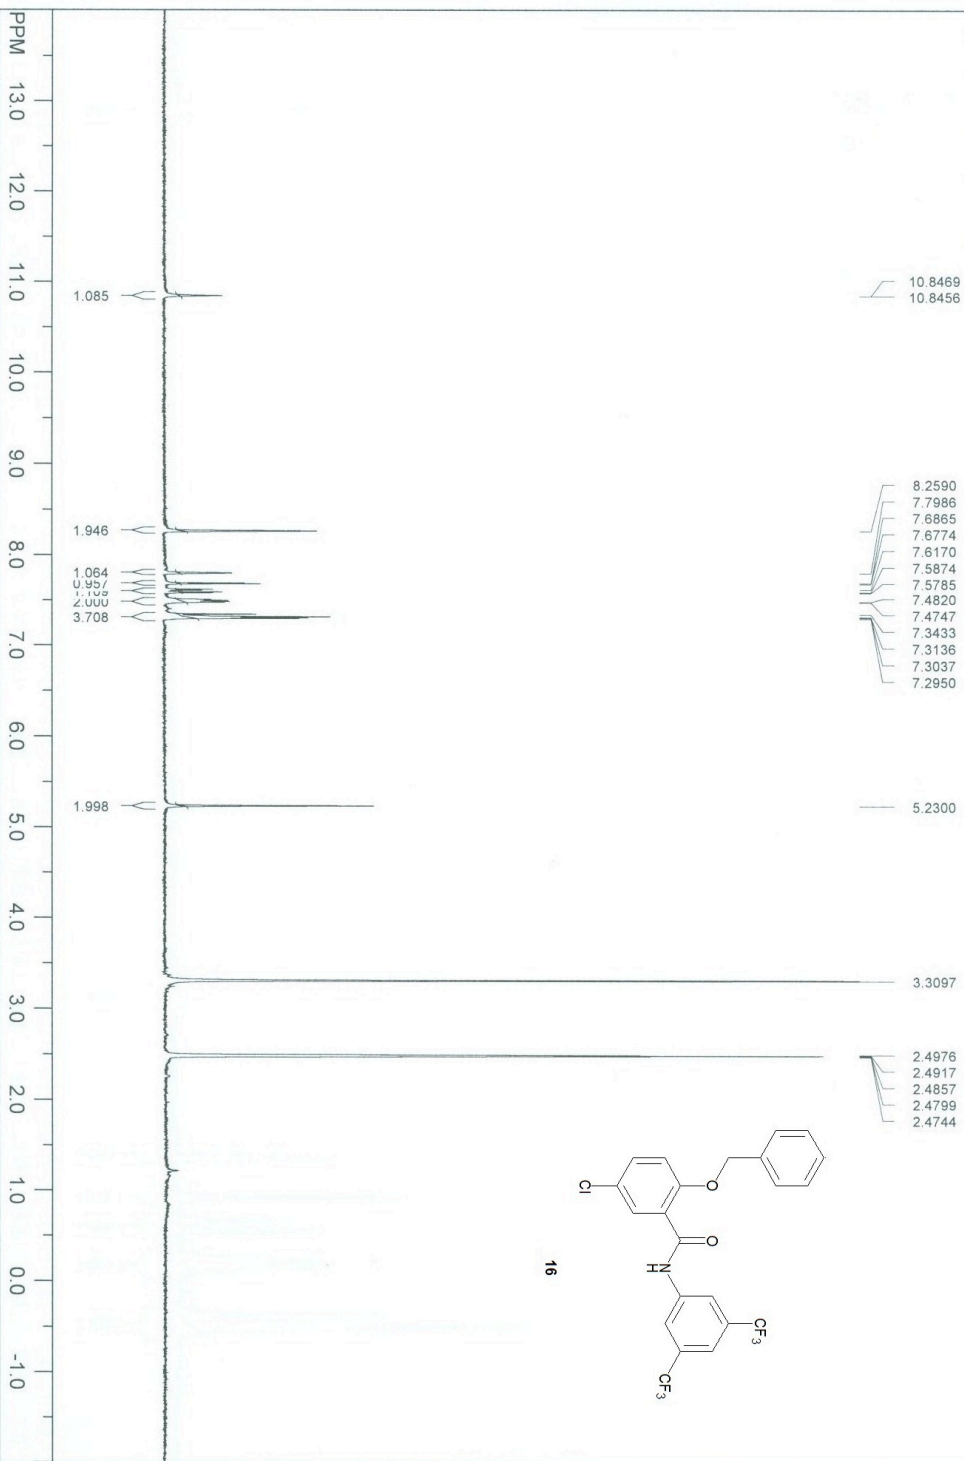

file: C:\Documents and Settings\윤창수\바탕 화면\보리\N-261-1\_fid\fid block# 1 exp1: "s2pu1"  
 Transmitter freq.: 299.950076 MHz  
 time domain size: 13698 points  
 width: 4807.69 Hz = 16.028308 ppm = 0.244070 Hz/pt  
 number of scans: 8

freq. of 0 ppm: 299.948276 MHz  
 processed size: 65536 complex points  
 LB: 0.200 GB: 0.0000  
 Hz/cm: 192.308 ppm/cm: 0.64113

KRT1827

File: Proton  
Pulse Sequence: s2pu1

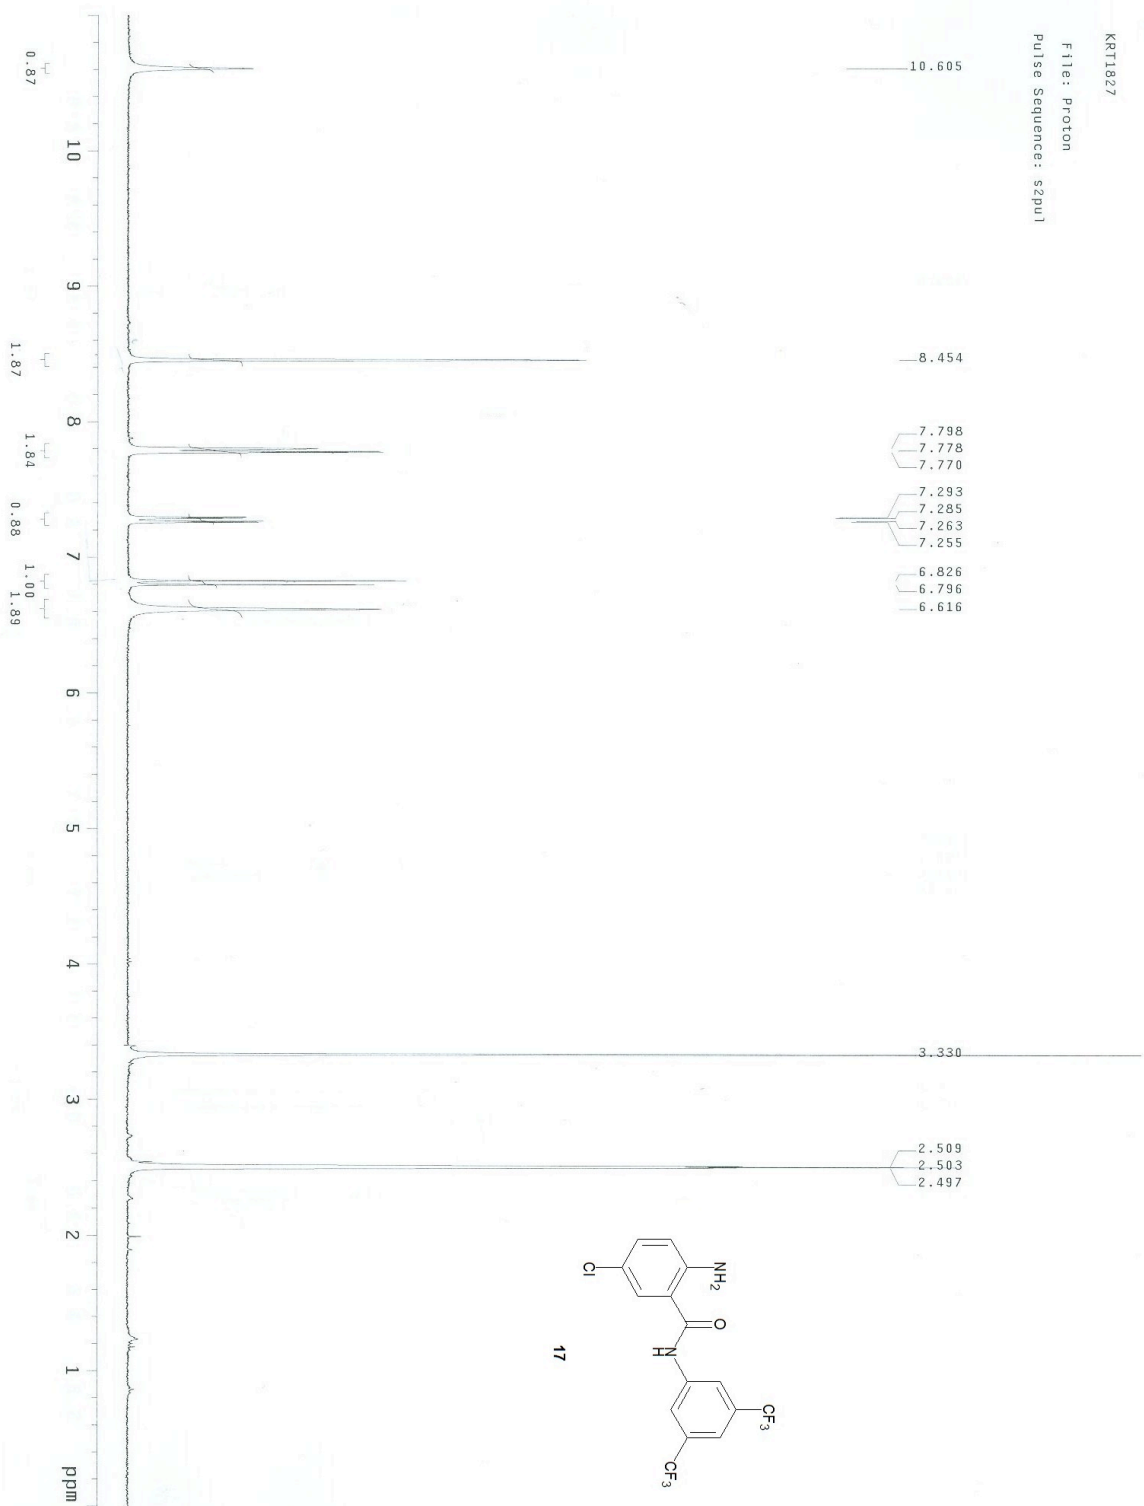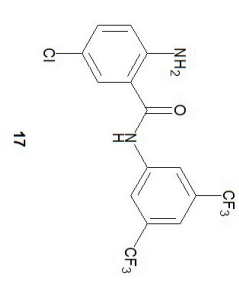

SpinWorks 2.4: KRT-1055 in DMSO

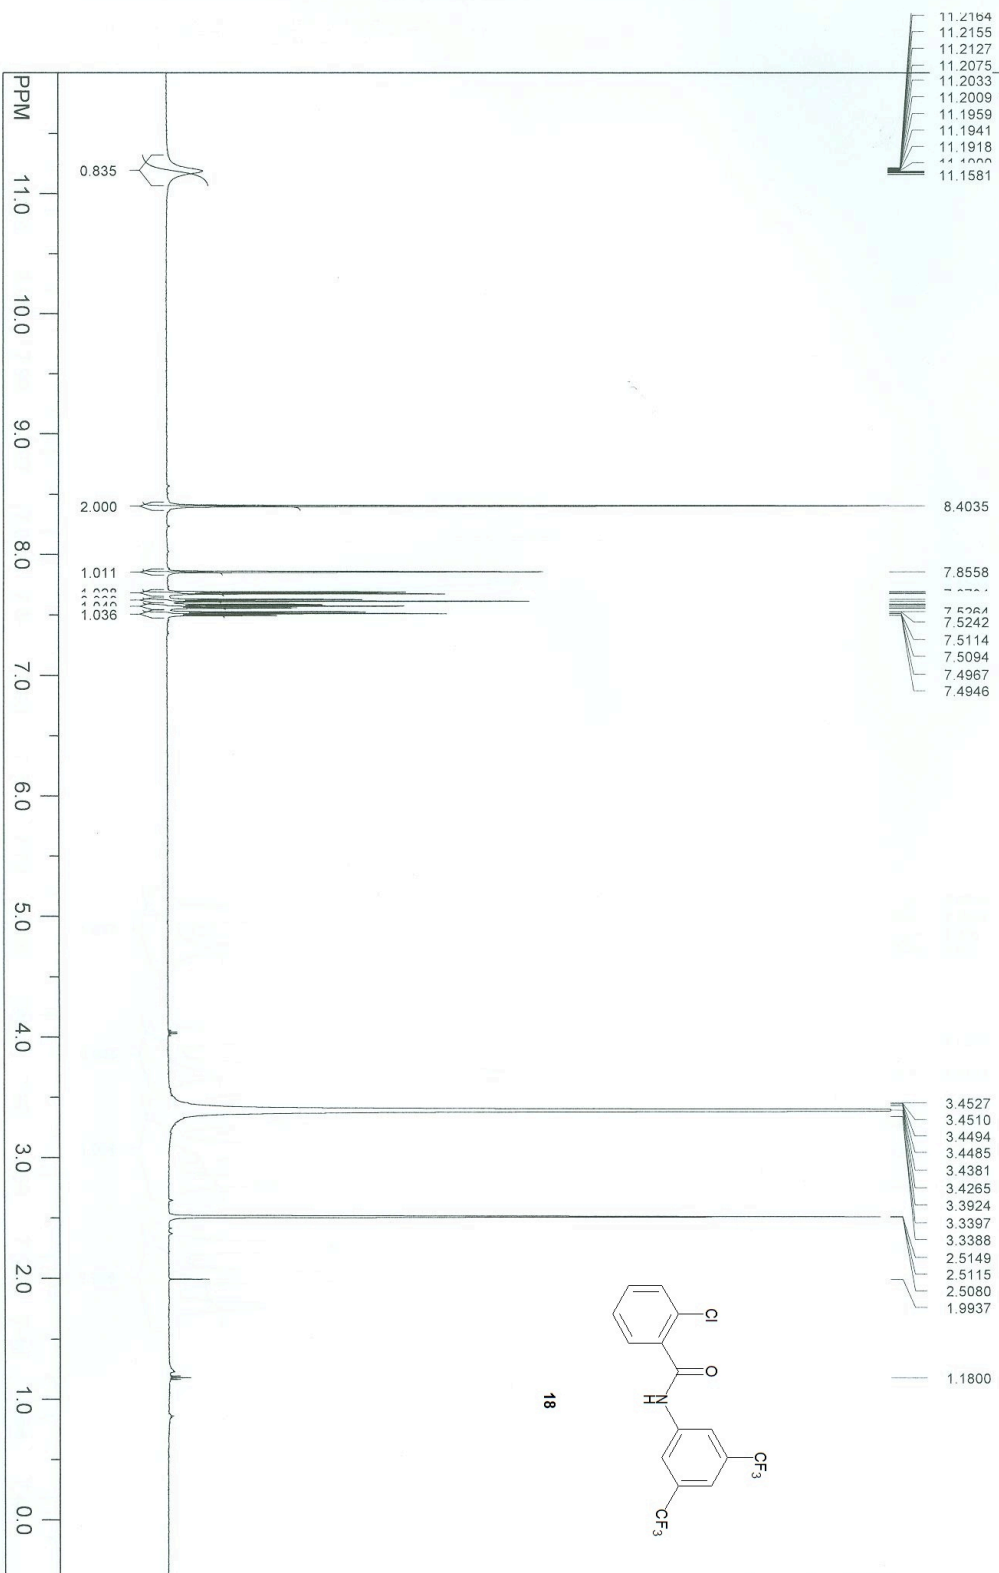

file: C:\Users\Administrator\Desktop\KRT-1055\2\fid exp1: <zg30>  
transmitter freq.: 500.133251 MHz  
time domain size: 65536 points  
width: 7507.51 Hz = 15.011015 ppm = 0.114555 Hz/pt  
number of scans: 32

freq. of 0 ppm: 500.130000 MHz  
processed size: 32768 complex points  
LB: 0.300 GB: 0.0000  
HZ/cm: 250.276 ppm/cm: 0.50042

SpinWorks 2.4: N-270-DMSO

10.0666  
10.0647  
10.0612  
10.0594  
10.0575  
10.0551  
10.0515  
10.0478  
10.0415  
10.0378

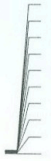

7.2156  
7.2069  
7.1239  
7.1115  
7.1098  
7.1035  
7.0942  
7.0464  
6.8607  
6.8321

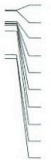

4.2724  
4.2535

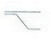

3.3612  
3.3316  
3.3055  
3.3034  
3.3016

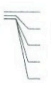

2.5012  
2.4957  
2.4900

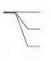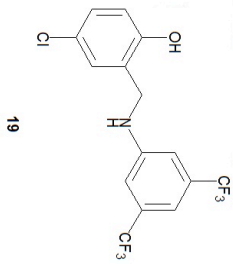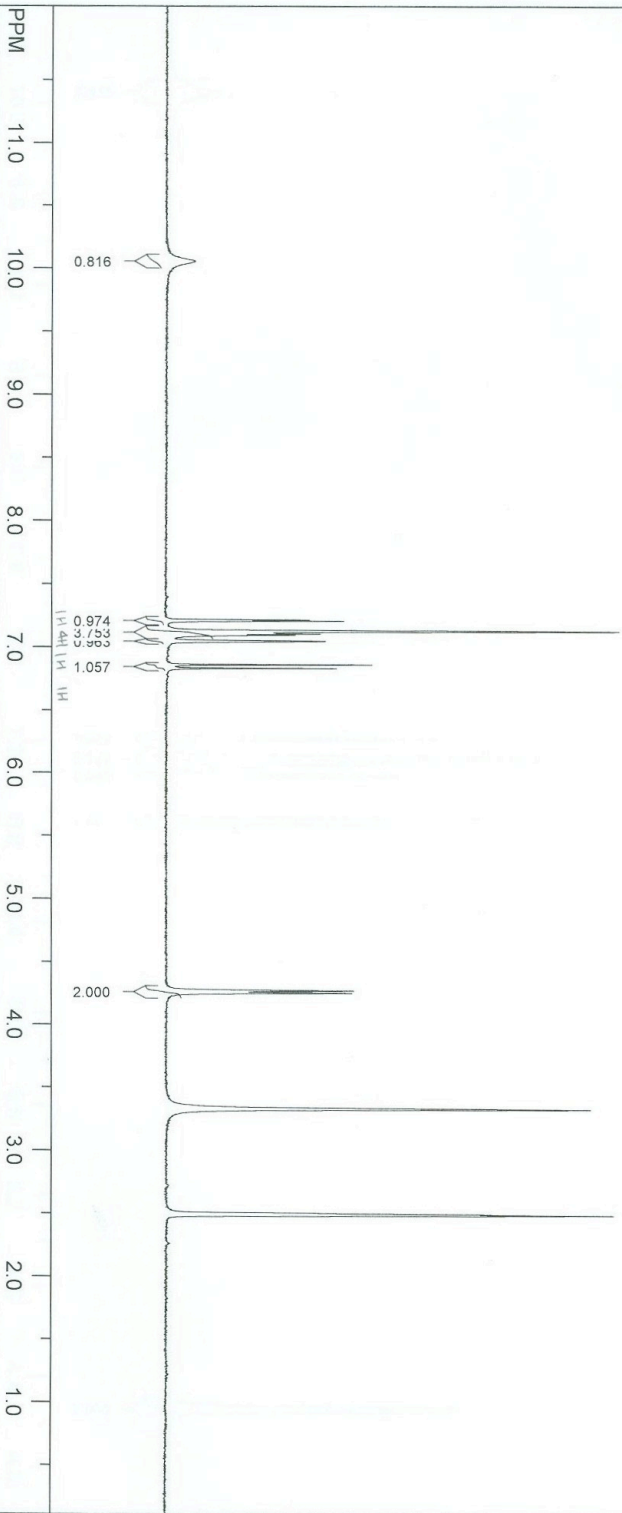

file: C:\Documents and Settings\김명준\104호\바탕 화면\N-270.fid\fid block# 1 exp.: "s2pu"  
transmitter freq.: 299.950076 MHz  
time domain size: 19698 points  
width: 4807.69 Hz = 16.028308 ppm = 0.244070 Hz/pt  
number of scans: 8

freq. of 0 ppm: 299.948276 MHz  
processed size: 65536 complex points  
LB: 0.200 GB: 0.0000  
HZ/cm: 143.741 ppm/cm: 0.47921

SpinWorks 2.4: KRT1197

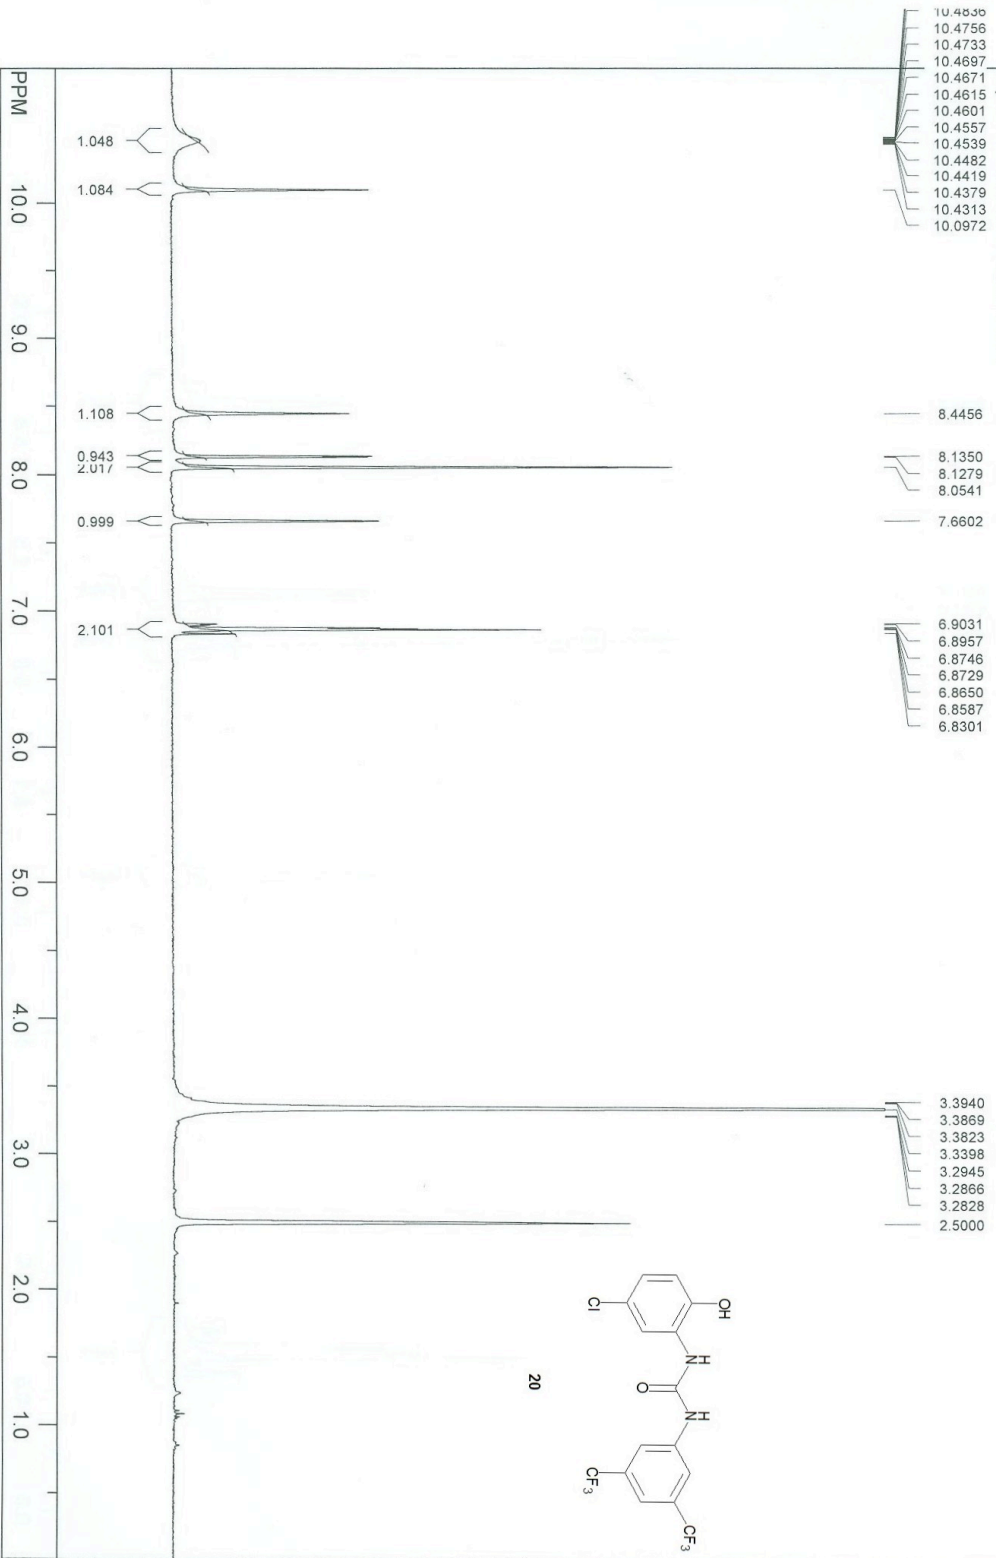

file: C:\min\KRT1197\fid\fid block# 1 expt: "s2pul"  
 transmitter freq.: 299.950076 MHz  
 time domain size: 19698 points  
 width: 4807.69 Hz = 16.028308 ppm = 0.244070 Hz/pt  
 number of scans: 8

freq. of 0 ppm: 299.948273 MHz  
 processed size: 65536 complex points  
 LB: 0.200 GB: 0.0000  
 Hz/cm: 131.782 ppm/cm: 0.43935

SpinWorks 2.4: 267-1

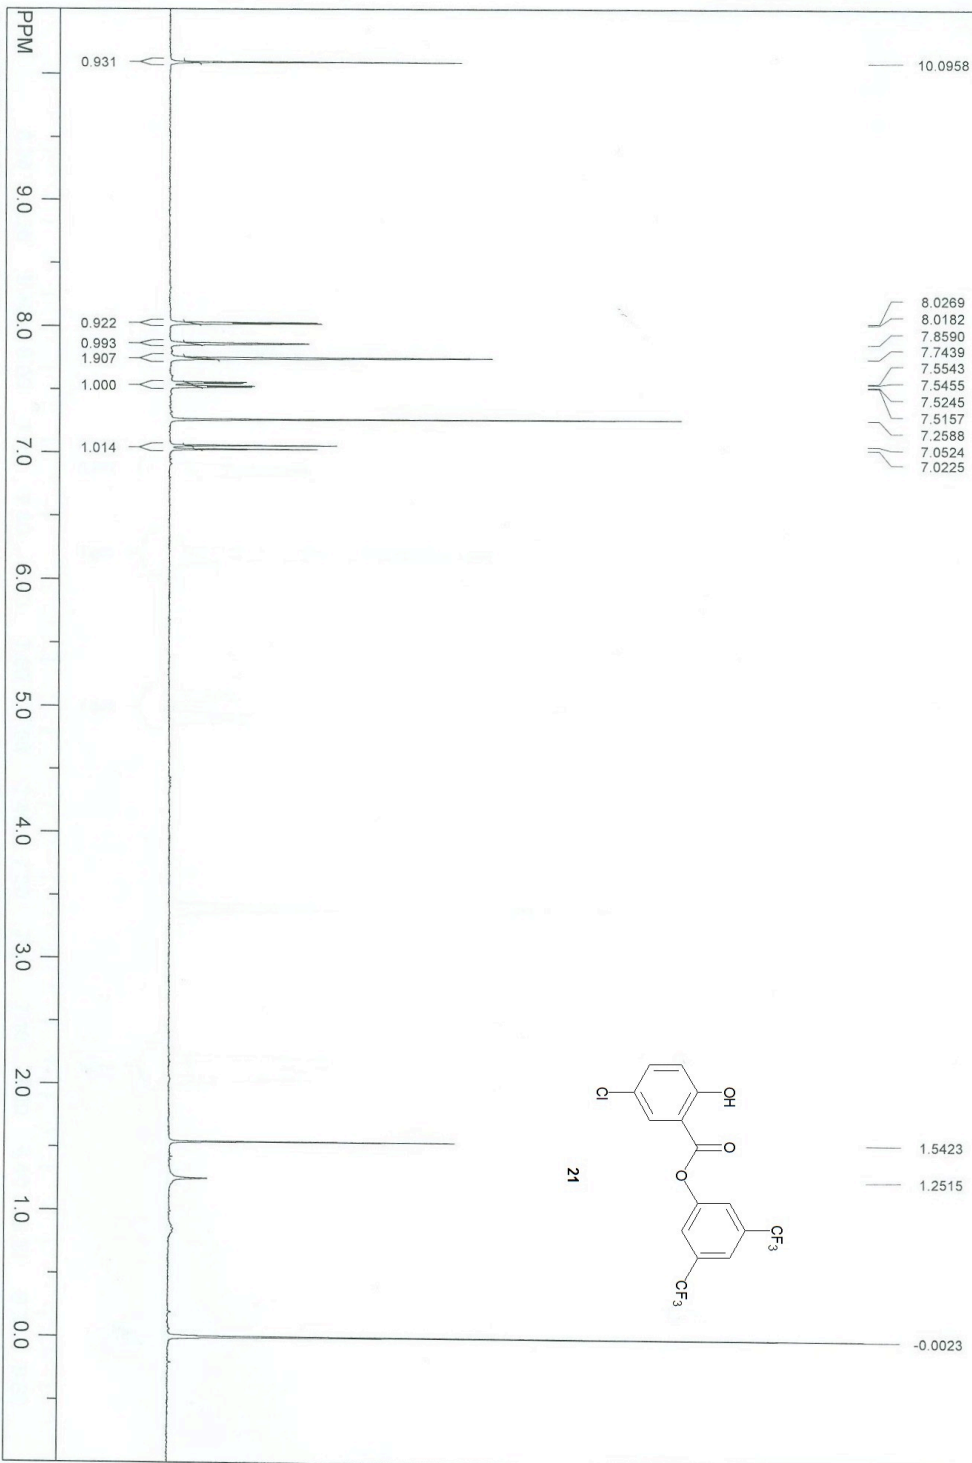

file: C:\M\267-1.fid\td block# 1 exp# "s2pul"  
transmitter freq.: 299.94651 MHz  
time domain size: 19698 points  
width: 4807.69 Hz = 16.028384 ppm = 0.244070 Hz/pt  
number of scans: 8

freq. of 0 ppm: 299.94652 MHz  
processed size: 65536 complex points  
LB: 0.200 GB: 0.0000  
Hz/cm: 138.153 ppm/cm: 0.46059

SpinWorks 2.4: KRT1170

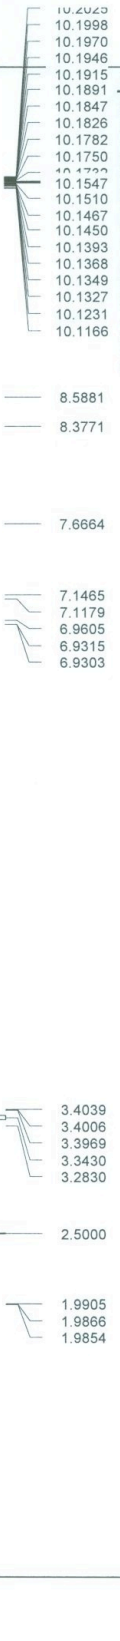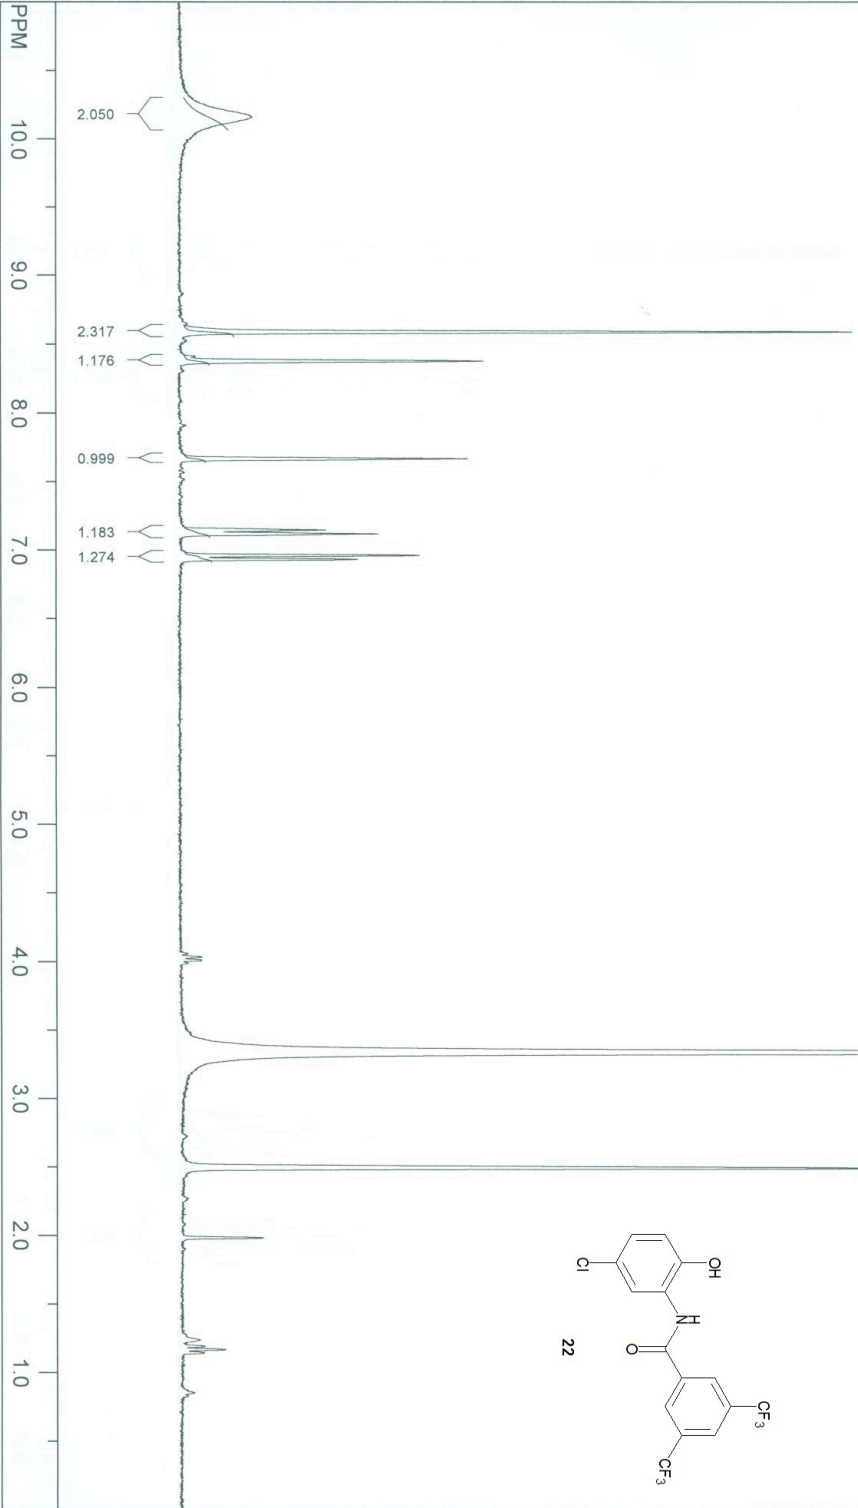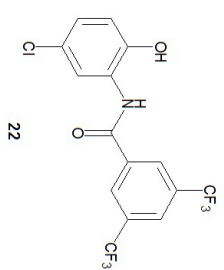

file: C:\민환\KRT1170\fid\fid block# 1 exp: "s2pu"

transmitter freq.: 299.950076 MHz

time domain size: 19698 points

width: 4807.69 Hz = 16.028308 ppm = 0.244070 Hz/pt

number of scans: 8

freq. of 0 ppm: 299.948191 MHz

processed size: 65536 complex points

LB: 0.200 GB: 0.0000

HZ/cm: 131.950 ppm/cm: 0.43991

SpinWorks 2.4: KRT1858-1

12.4028  
12.4002  
12.3969  
12.3948  
12.3932  
12.3914  
12.3884  
12.3866  
12.3848  
12.3129

8.7344  
7.9997  
7.7331  
7.4877  
7.3285  
6.9493

3.4042  
3.3434  
3.2672  
3.2631  
3.2598  
3.2576  
3.2554  
3.2506  
3.2500  
2.5360  
2.5056  
2.5000  
2.4948  
1.9065

1.2504  
1.2452  
1.2296  
0.8555  
0.8537  
0.8426  
0.8352  
0.8274  
0.8251  
0.8214

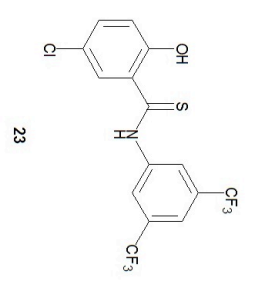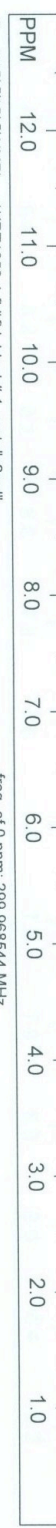

file: D:\민환\민환NMR\run\KRT1858-1.fid\fid block# 1 exp1: "s2pu1"  
 transmitter freq.: 299.970343 MHz  
 time domain size: 19698 points  
 width: 4807.69 Hz = 16.027225 ppm = 0.244070 Hz/pt  
 number of scans: 8  
 freq. of 0 ppm: 299.969544 MHz  
 processed size: 65536 complex points  
 LB: 0.200 GB: 0.0000  
 Hz/cm: 156.109 ppm/cm: 0.52041



SpinWorks 2.4: KRT1836

11.3077  
11.2984  
11.2916  
11.2881  
11.2847  
11.2801  
11.2774  
11.2735  
11.2712  
11.2622  
11.2597  
11.2521  
11.2437  
11.2332

7.7190  
7.7101  
7.6970  
7.6774  
7.5107  
7.5028  
7.5018  
7.4813  
7.4735  
7.4724  
6.9613  
6.9319

3.3450

2.5041  
2.4987  
2.4940

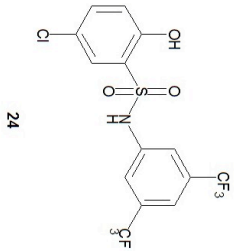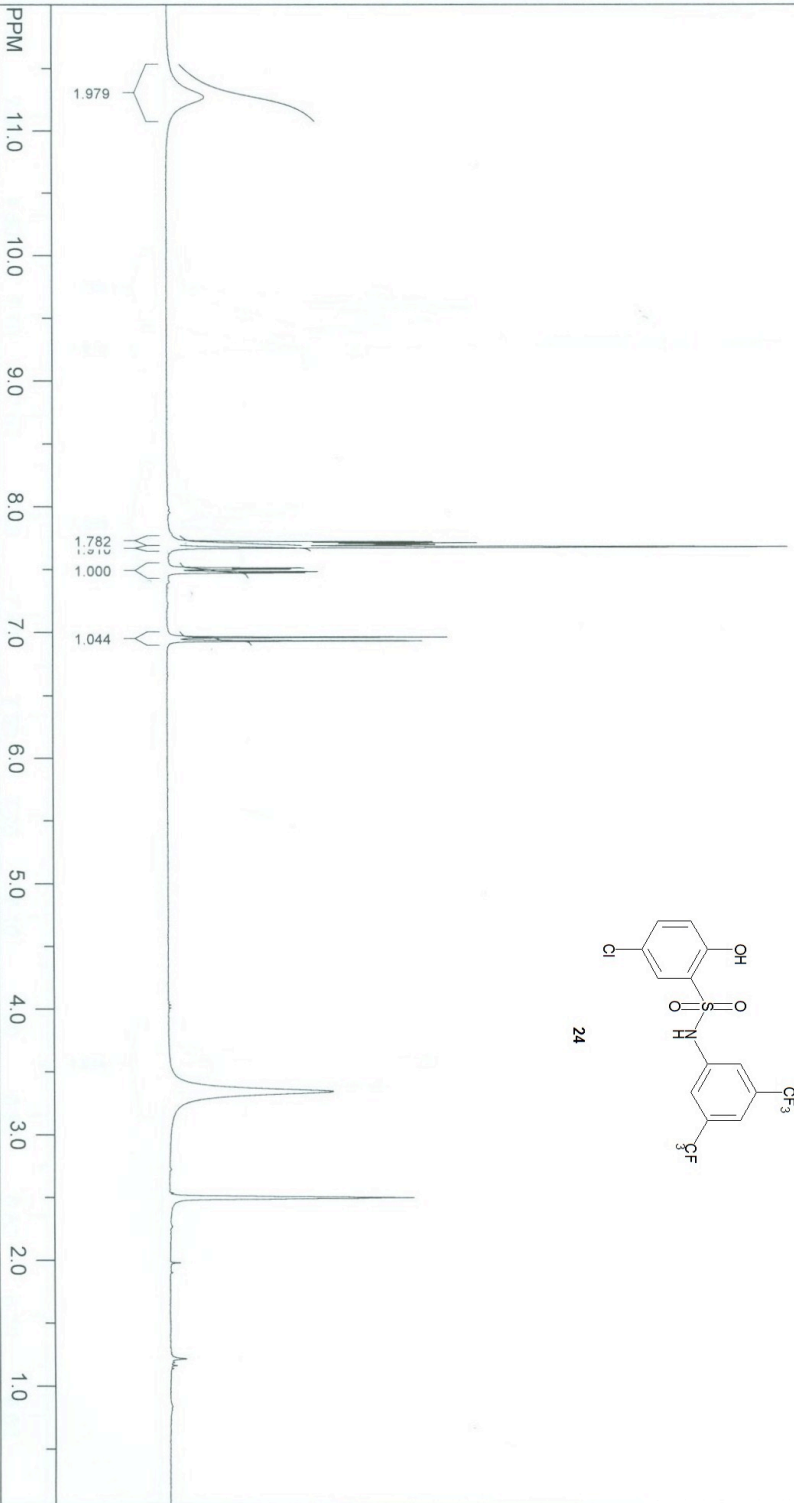

file: C:\PI\KRT1836.fid\fid block# 1 exp: "s2pu"

transmitter freq.: 299.970343 MHz

time domain size: 19698 points

width: 4807.69 Hz = 16.027225 ppm = 0.244070 Hz/pt

number of scans: 8

freq. of 0 ppm: 299.968545 MHz

processed size: 65536 complex points

LB: 0.200 GB: 0.0000

HZ/cm: 143.854 ppm/cm: 0.47956

SpinWorks 2.4: N-271-DMSO

- 12.1025
- 12.0990
- 12.0972
- 12.0955
- 12.0905
  
- 9.4318
- 9.4126
- 9.3947
- 9.3926
  
- 8.0512
- 8.0147
- 7.8908
- 7.8819
  
- 7.4610
- 7.4522
- 7.4316
- 7.4228
- 6.9816
- 6.9522
  
- 4.6864
- 4.6670
  
- 2.5075
- 2.5016
- 2.4957
- 2.4900
- 2.4845

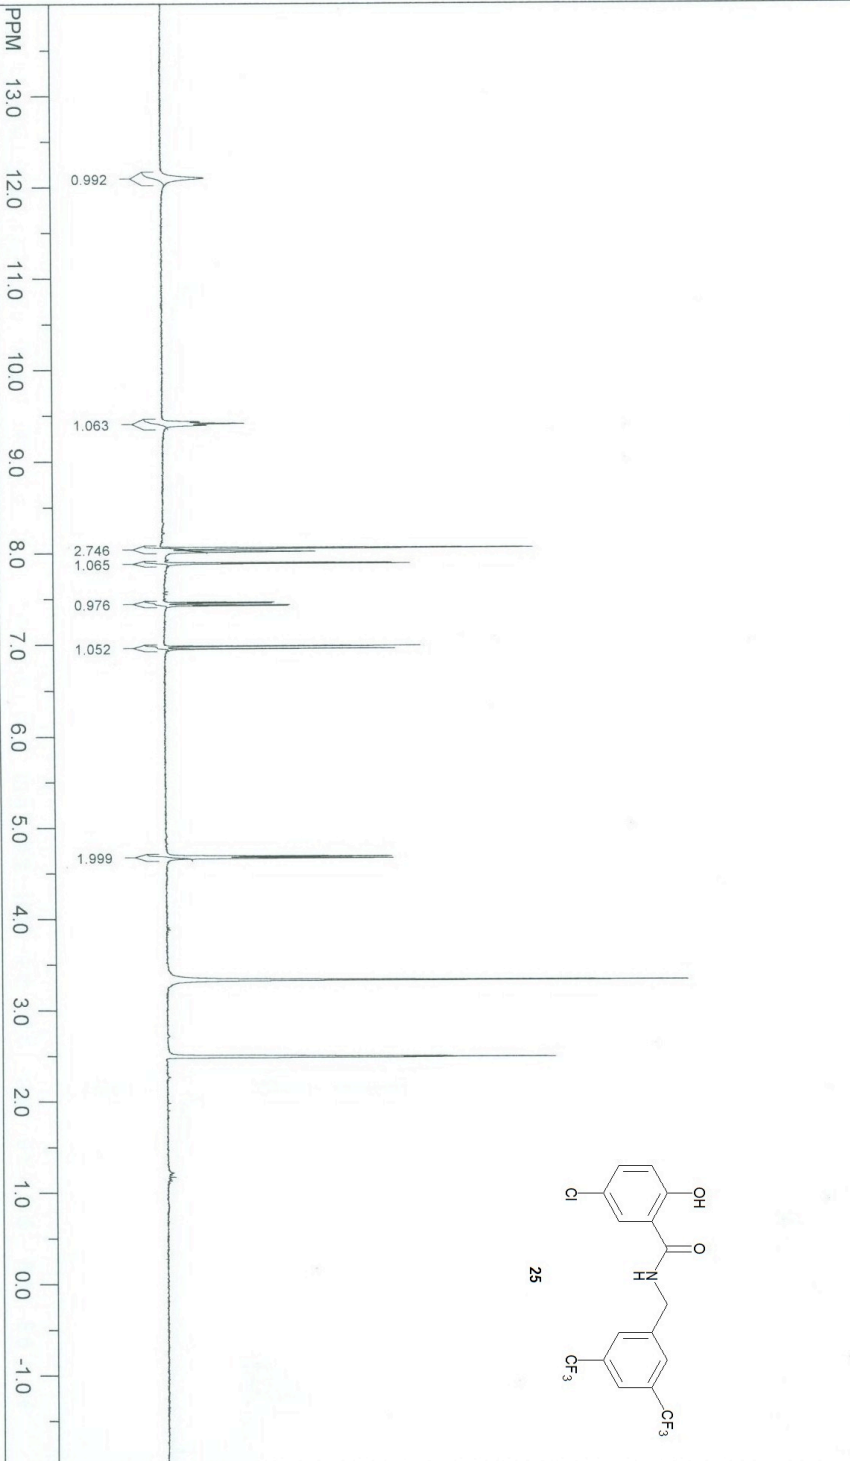

file: C:\Documents and Settings\김영중\104호\바탕 화면\남보리\N-271.fid\fd block# 1 exp: "szpu"  
 transmitter freq.: 299.950076 MHz  
 time domain size: 19698 points  
 width: 4807.69 Hz = 16.028308 ppm = 0.244070 Hz/pt  
 number of scans: 8  
 freq. of 0 ppm: 299.948276 MHz  
 processed size: 65536 complex points  
 LB: 0.200 GB: 0.0000  
 Hz/cm: 192.308 ppm/cm: 0.64113

SpinWorks 2.4: KRT1044

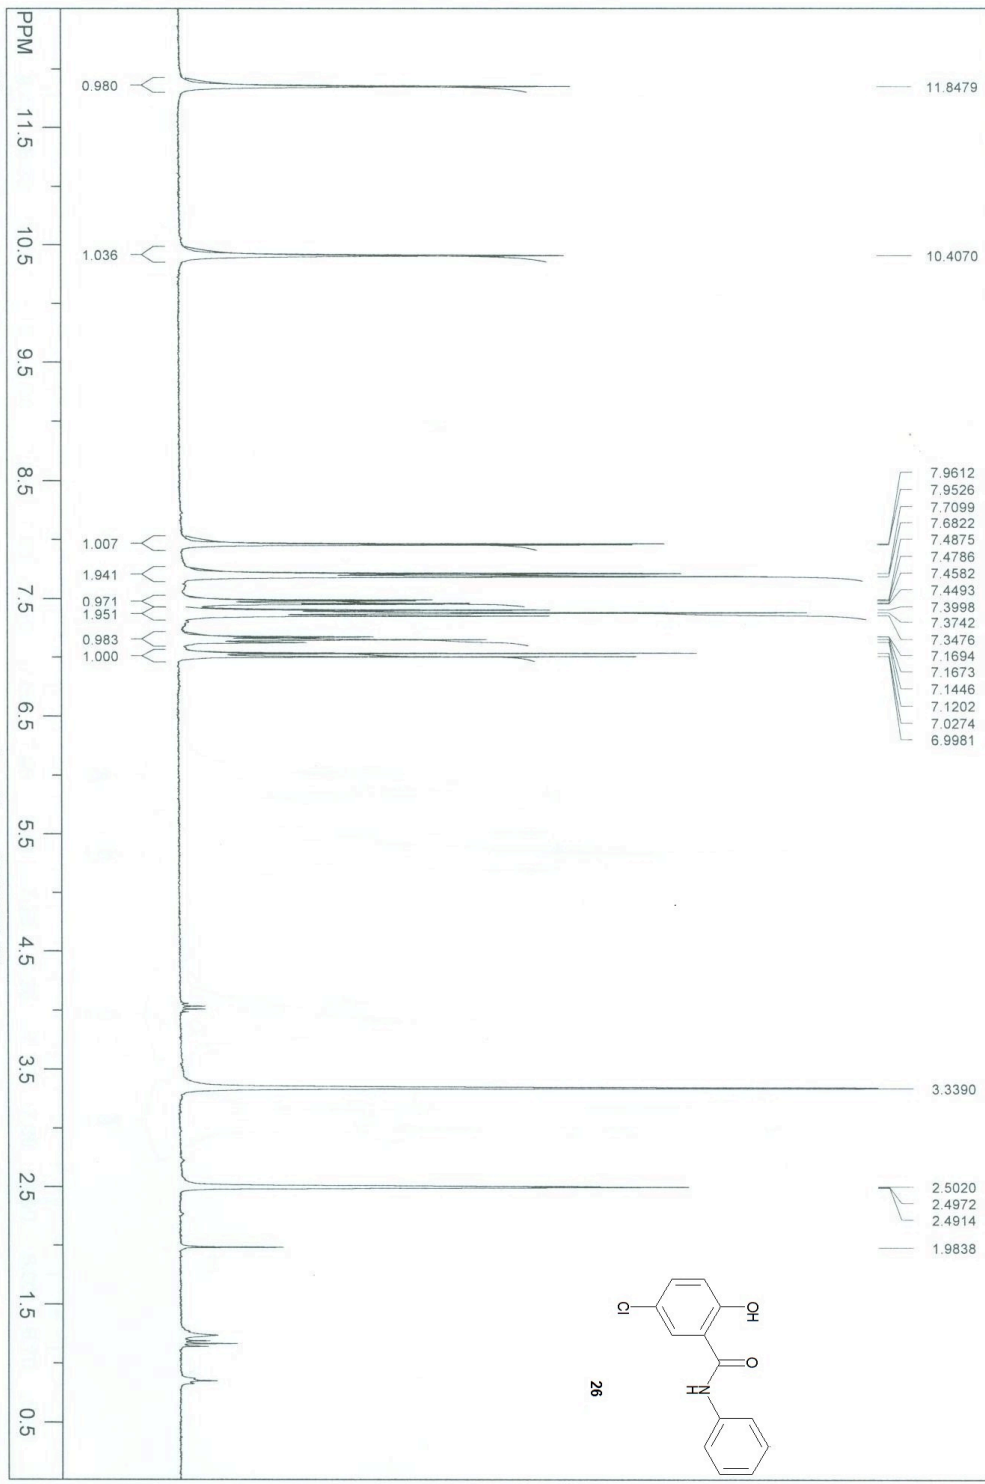

SpinWorks 2.4: KRT1173

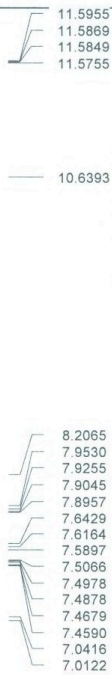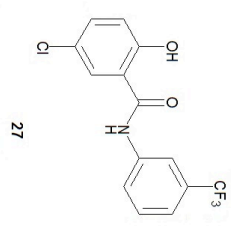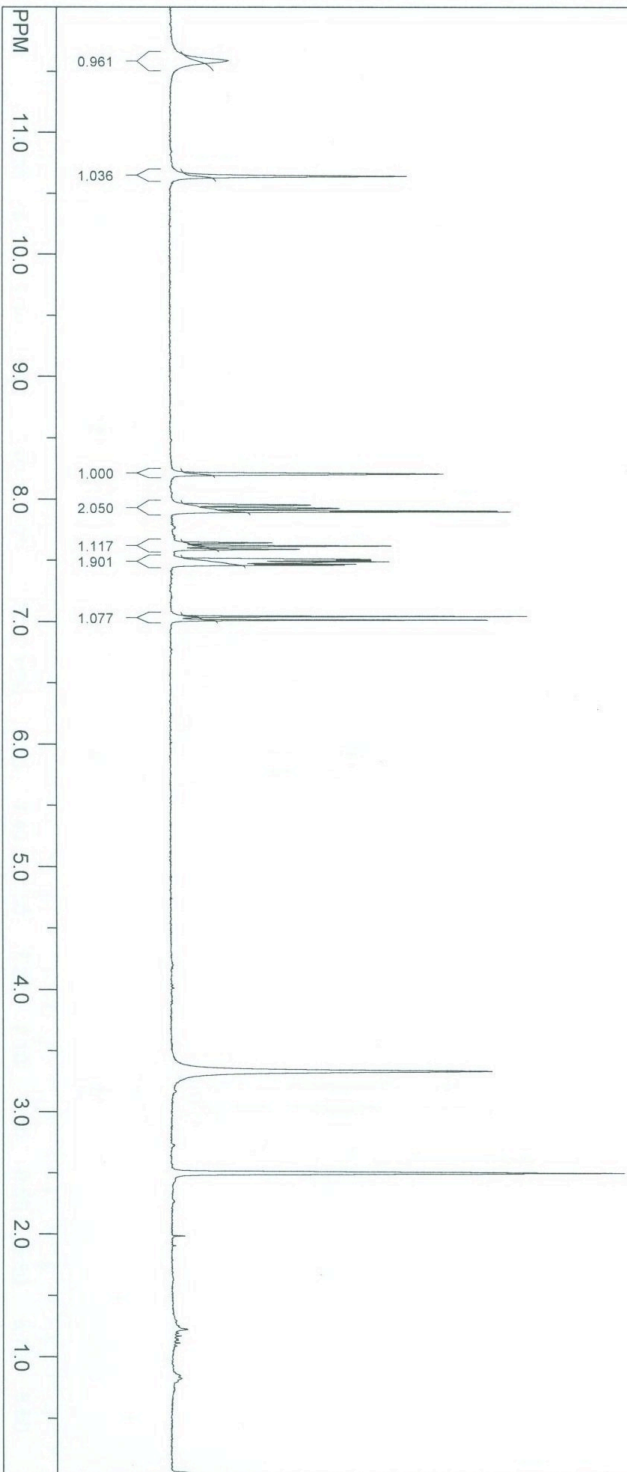

file: C:\1\KRT1173.fid\fid block# 1 exp: "s2pu"

transmitter freq: 299.950076 MHz

time domain size: 19698 points

width: 4807.69 Hz = 16.028308 ppm = 0.244070 Hz/pt

number of scans: 8

freq. of 0 ppm: 299.948272 MHz

processed size: 65536 complex points

LB: 0.200 GB: 0.0000

Hz/cm: 144.189 ppm/cm: 0.48071

SpinWorks 2.4: N-339

- 10.7277
- 10.7214
- 10.7192
- 10.7165
- 10.7124
- 8.1286
- 8.1262
- 8.1057
- 8.1009
- 8.0992
- 7.9241
- 7.9205
- 7.9157
- 7.7205
- 7.7038
- 7.6739
- 7.6724
- 7.4614
- 7.4403
- 7.4362
- 7.4325
- 7.3854
- 7.3822
- 7.3805
- 7.3611
- 7.3591
- 7.0112
- 6.9830
- 6.9812

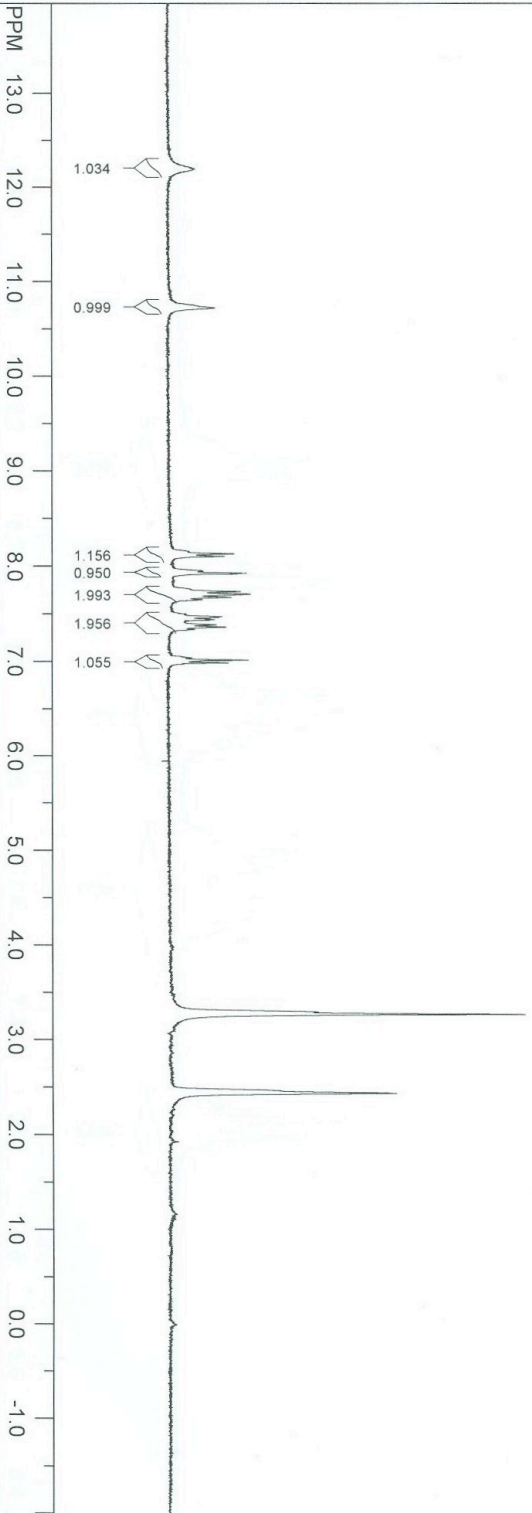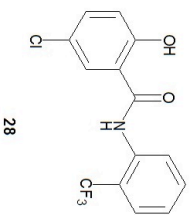

28

file: D:\남보라\NMR\N-333.fid\fid block# 1 exp1 "s2pu1"  
transmitter freq: 299.970343 MHz  
time domain size: 19698 points  
width: 4807.69 Hz = 16.027225 ppm = 0.244070 Hz/pt  
number of scans: 8

freq. of 0 ppm: 299.968561 MHz  
processed size: 65536 complex points  
LB: 0.200 GB: 0.0000  
Hz/cm: 192.308 ppm/cm: 0.64109

SpinWorks 2.4: KRT1183

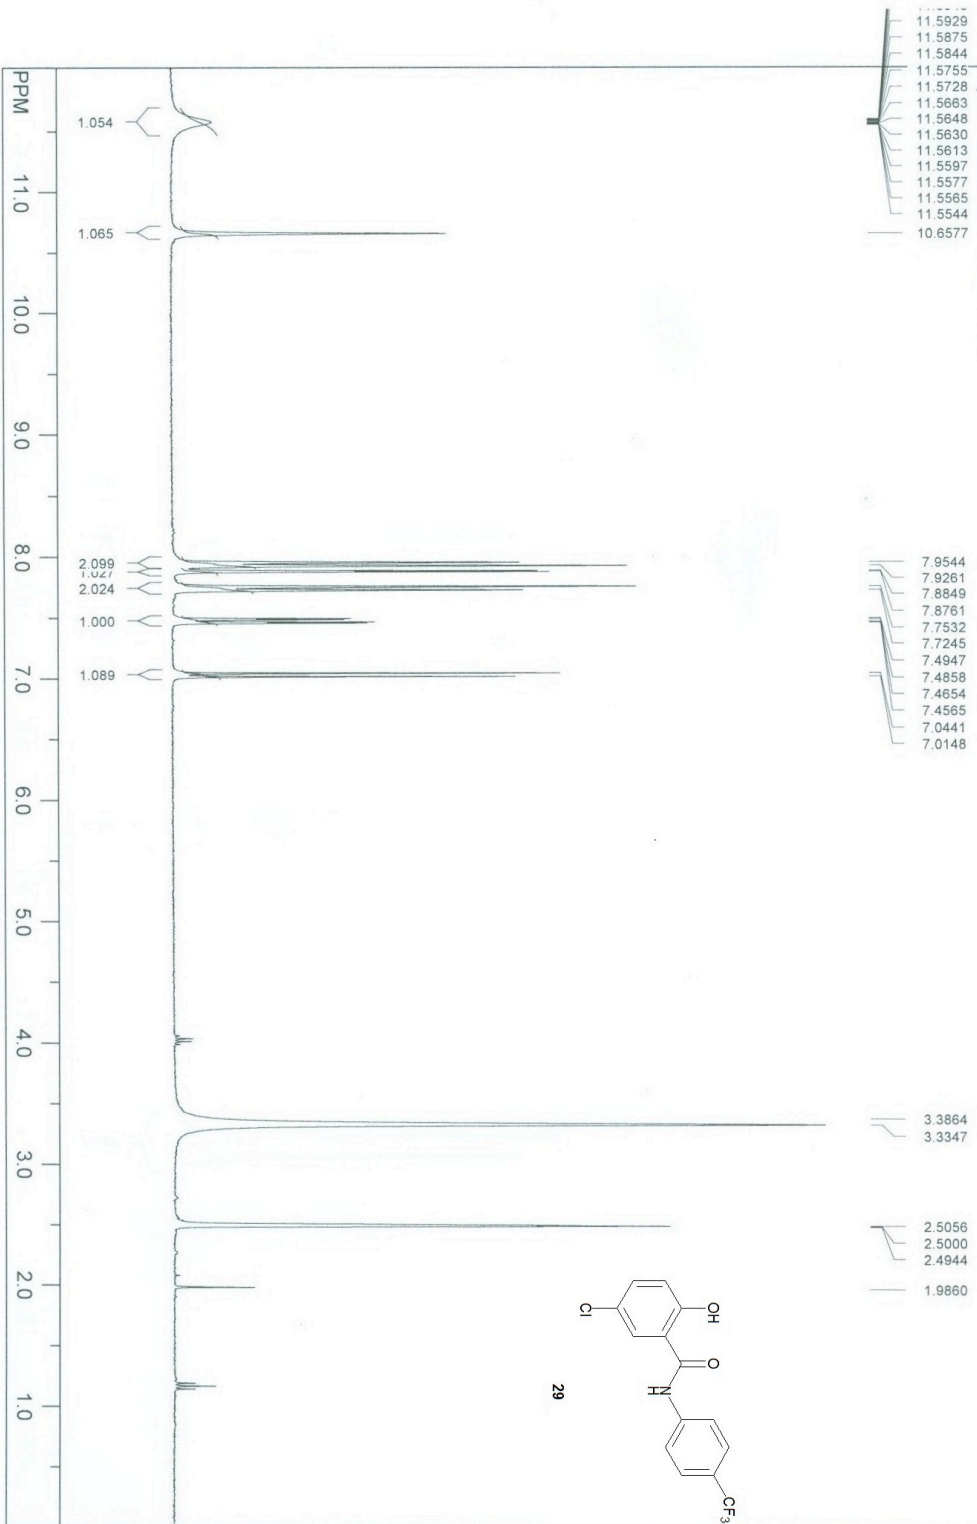

file: C:\M\KRT1183.fidfid block# 1 exp: "s2pu"  
transmitter freq.: 299.950076 MHz  
time domain size: 19698 points  
width: 4807.69 Hz = 16.028308 ppm = 0.244070 Hz/pt  
number of scans: 8

freq. of 0 ppm: 299.948272 MHz  
processed size: 65536 complex points  
LB: 0.200 GB: 0.0000  
Hz/cm: 144.189 ppm/cm: 0.48071

SpinWorks 2.4: KRT1199-1

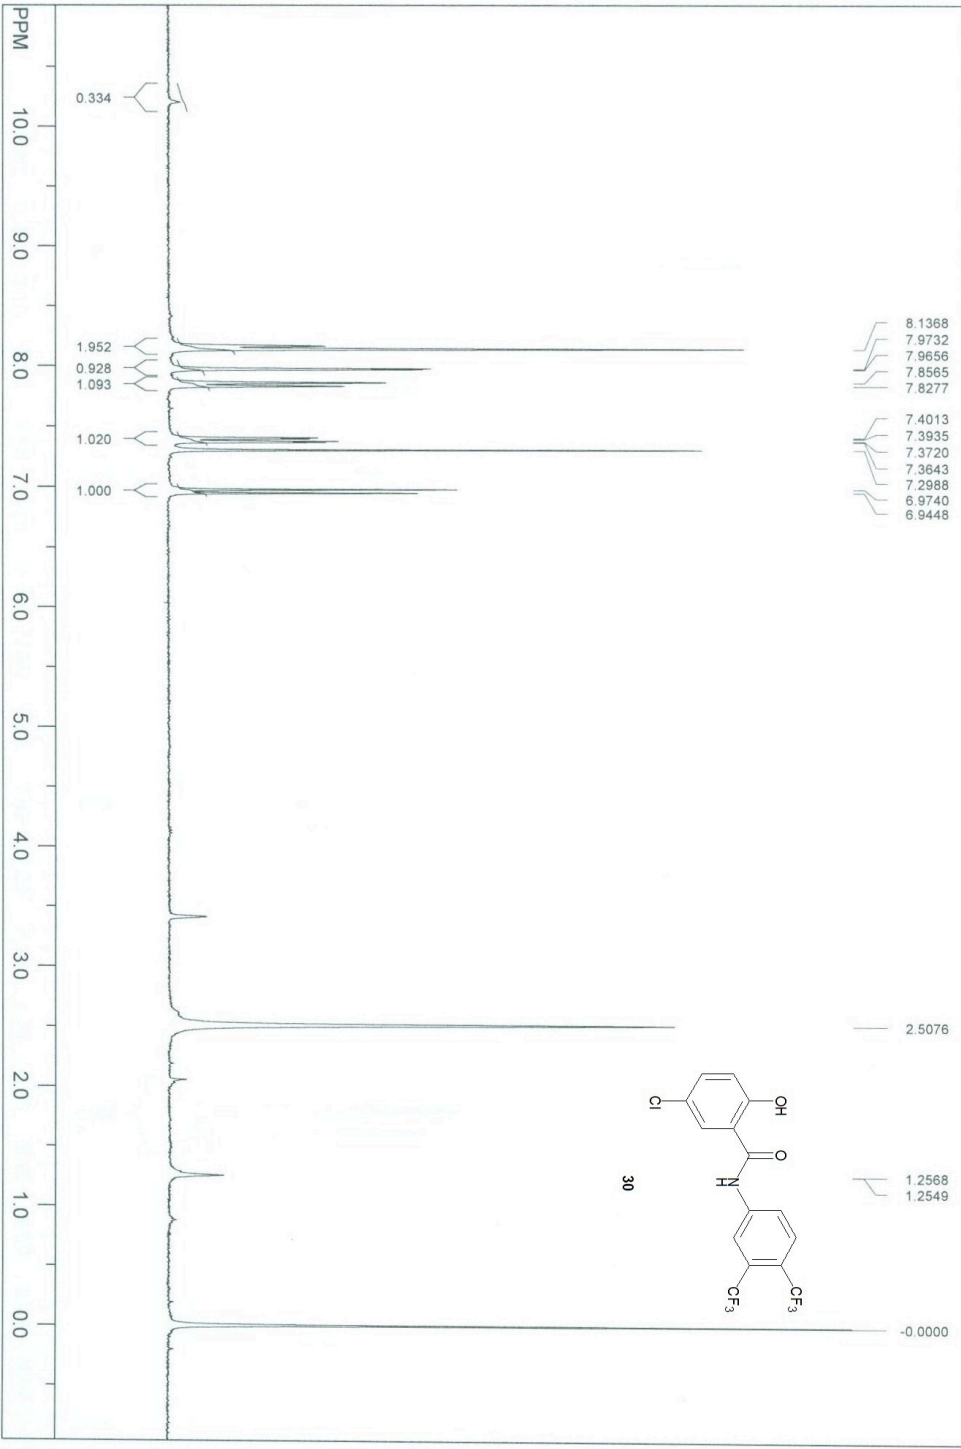

file: C:\M\KRT1199-1.fid\fd block# 1 exp1 "s2pu"  
transmitter freq.: 299.946851 MHz  
time domain size: 19698 points  
width: 4807.69 Hz = 16.028384 ppm = 0.244070 Hz/pt  
number of scans: 8

freq. of 0 ppm: 299.946842 MHz  
processed size: 65536 complex points  
LB: 0.200 GB: 0.0000  
HZ/cm: 143.686 ppm/cm: 0.47903

SpinWorks 2.4: KRT-1198 in CDCl3

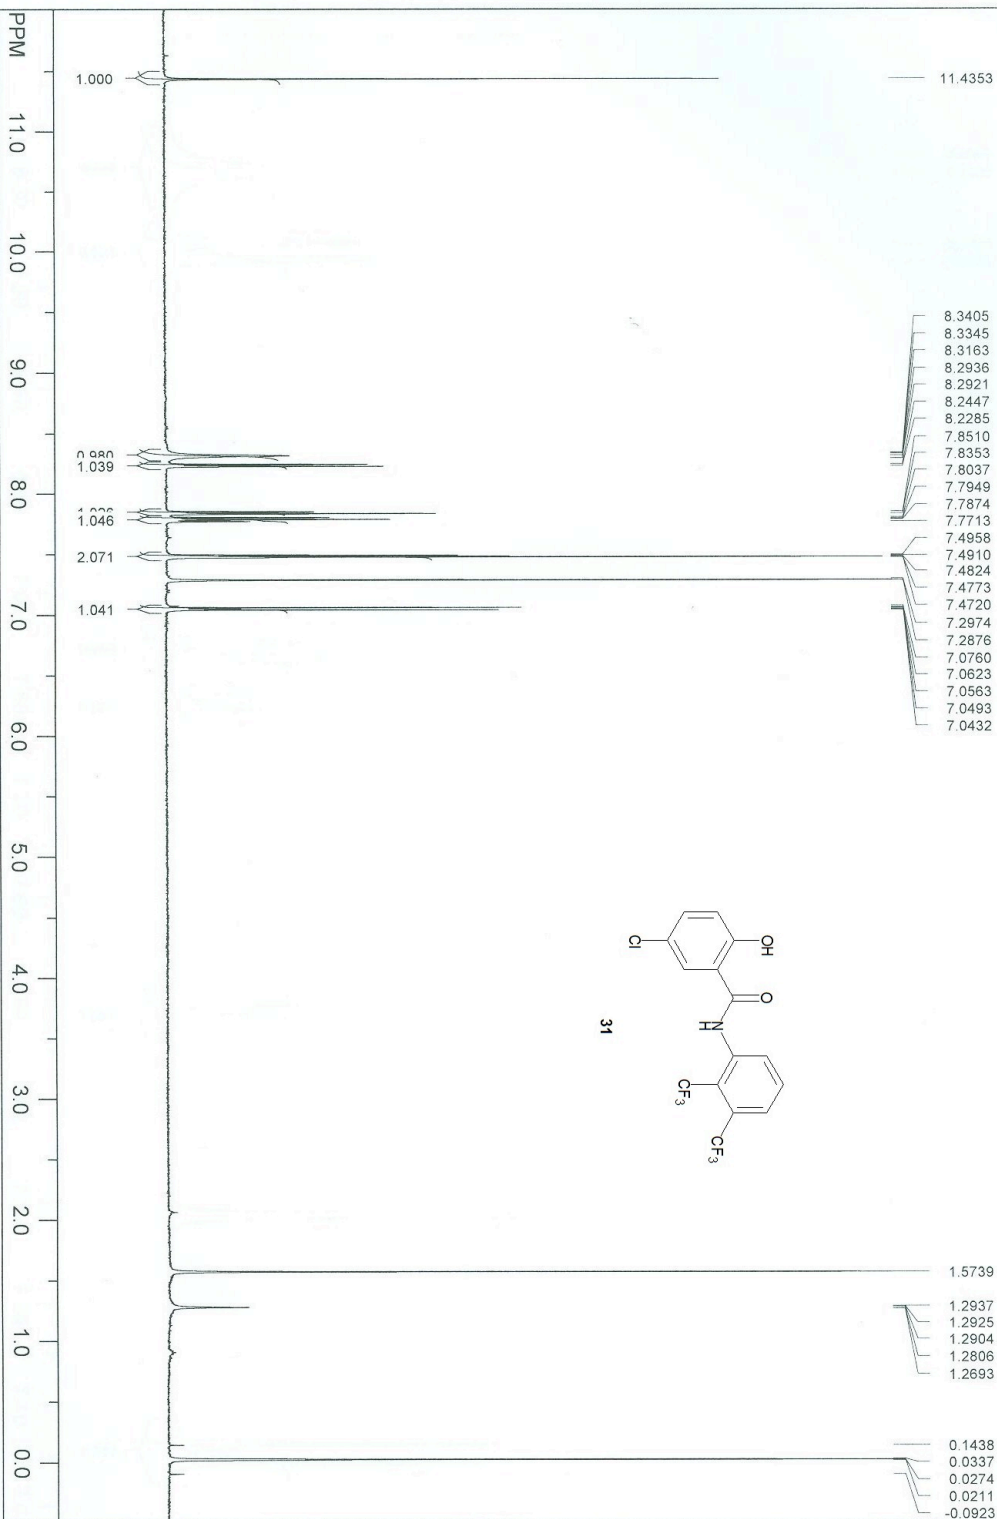

file: C:\Users\Administrator\Desktop\KRT-1198\2\fid exp1: -zg30->  
 transmitter freq.: 500.13251 MHz  
 time domain size: 65536 points  
 width: 7507.51 Hz = 15.011015 ppm = 0.114555 Hz/pt  
 number of scans: 32

freq. of 0 ppm: 500.130000 MHz  
 processed size: 32768 complex points  
 LB: 0.300 GB: 0.0000  
 Hz/cm: 250.120 ppm/cm: 0.50011



SpinWorks 2.4: KRT1188-1

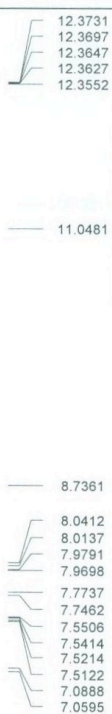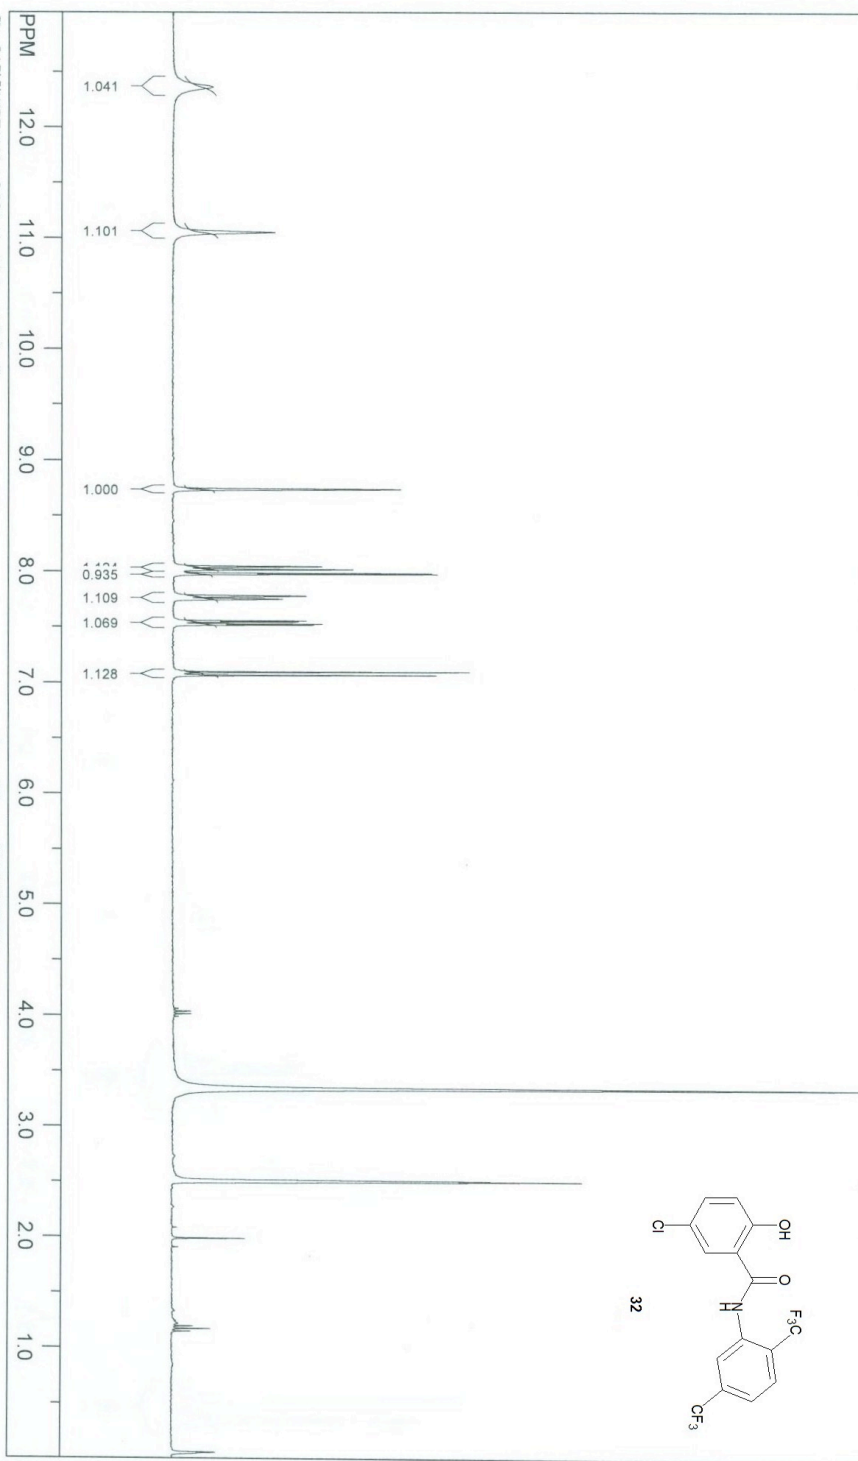

file: C:\B\KRT1188-1.fidfid block# 1 exp: "s2pu"

transmitter freq.: 299.950076 MHz

time domain size: 19698 points

width: 4807.69 Hz = 16.028308 ppm = 0.244070 Hz/pt

number of scans: 8

freq. of 0 ppm: 299.948279 MHz

processed size: 65536 complex points

LB: 0.200 GB: 0.0000

HZ/cm: 156.428 ppm/cm: 0.527151

SpinWorks 2.4: KRT1816-1

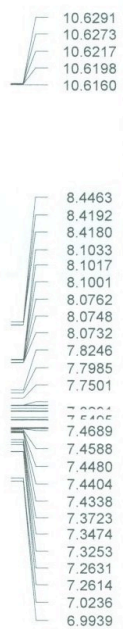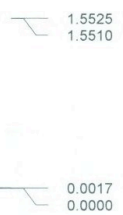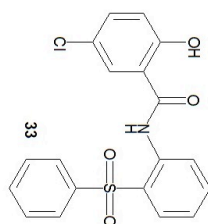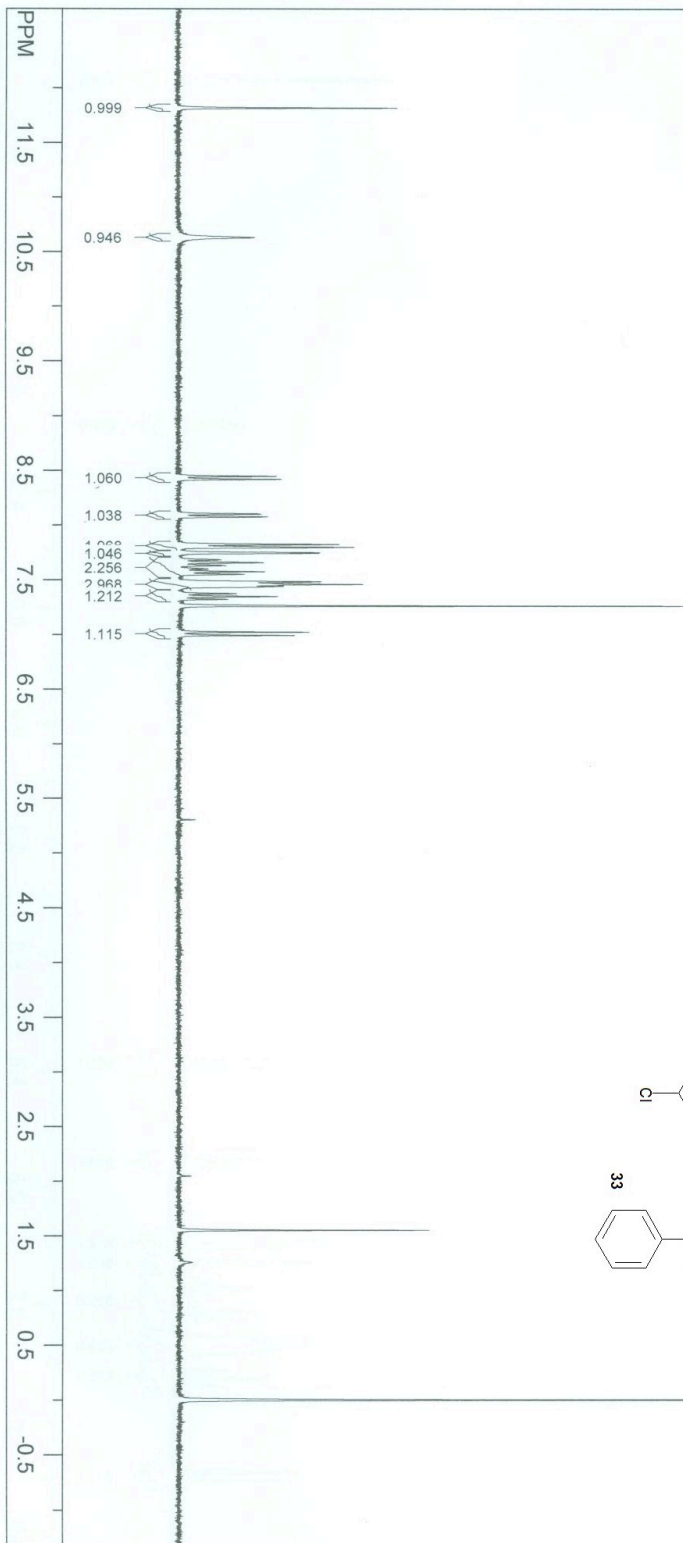

file: C:\Users\Administrator\Desktop\KRT1816-1\_fid\fid block# 1 exp1: "s2pu1"  
 transmitter freq.: 299.968846 MHz  
 time domain size: 19698 points  
 width: 4807.69 Hz = 16.027305 ppm = 0.244070 Hz/pt  
 number of scans: 8  
 freq. of 0 ppm: 299.967046 MHz  
 processed size: 65536 complex points  
 LB: 0.000 GB: 0.0000  
 Hz/cm: 169.211 ppm/cm: 0.56409

SpinWorks 2.4: KRT1166

11.0948  
11.0924  
11.0907  
11.0894  
11.0872  
11.0858  
11.0825  
11.0790  
11.0733  
11.0694  
11.0689  
10.9967

7.8572  
7.7247  
7.3501  
6.9213

3.3889  
3.3863  
3.3846  
3.3780  
3.3758  
3.3686  
3.3638  
3.3582  
3.3545  
3.3504  
3.1648  
2.5000

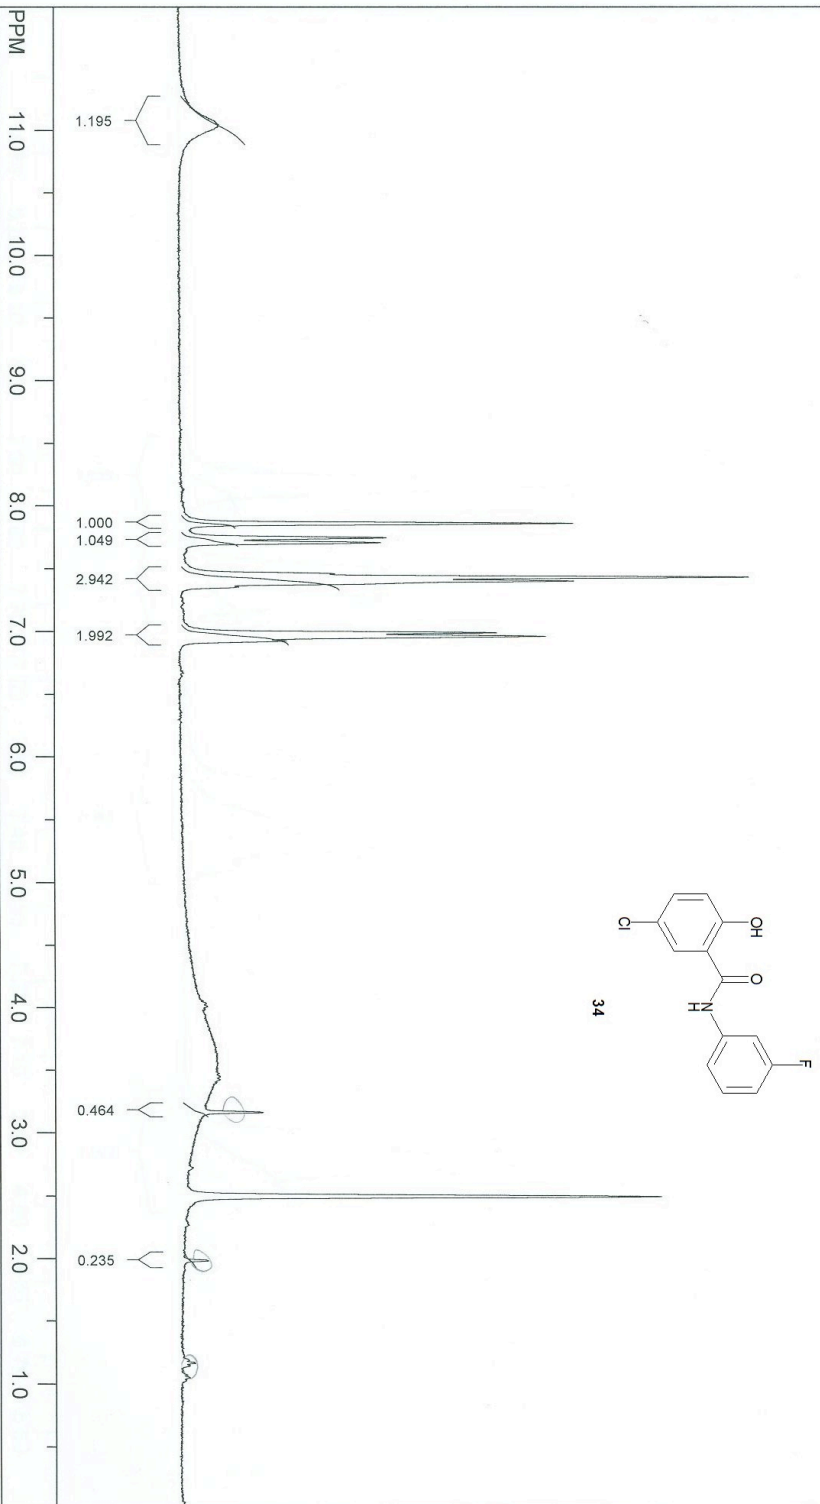

file: C:\min\KRT1166.fid\data block# 1 exp: "s2pul"  
transmitter freq.: 299.950076 MHz  
time domain size: 19698 points  
width: 4807.69 Hz = 16.028308 ppm = 0.244070 Hz/pt  
number of scans: 8

freq. of 0 ppm: 299.948188 MHz  
processed size: 65536 complex points  
LB: 0.200 GB: 0.0000  
Hz/cm: 143.696 ppm/cm: 0.47903

SpinWorks 2.4: KRT1179

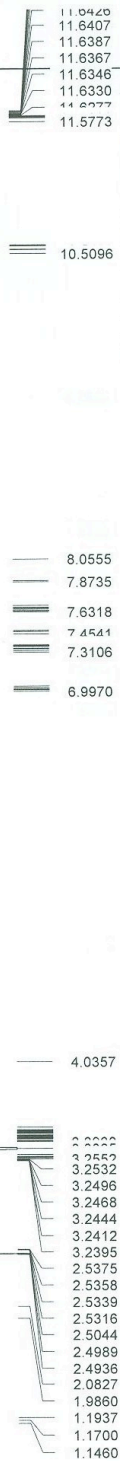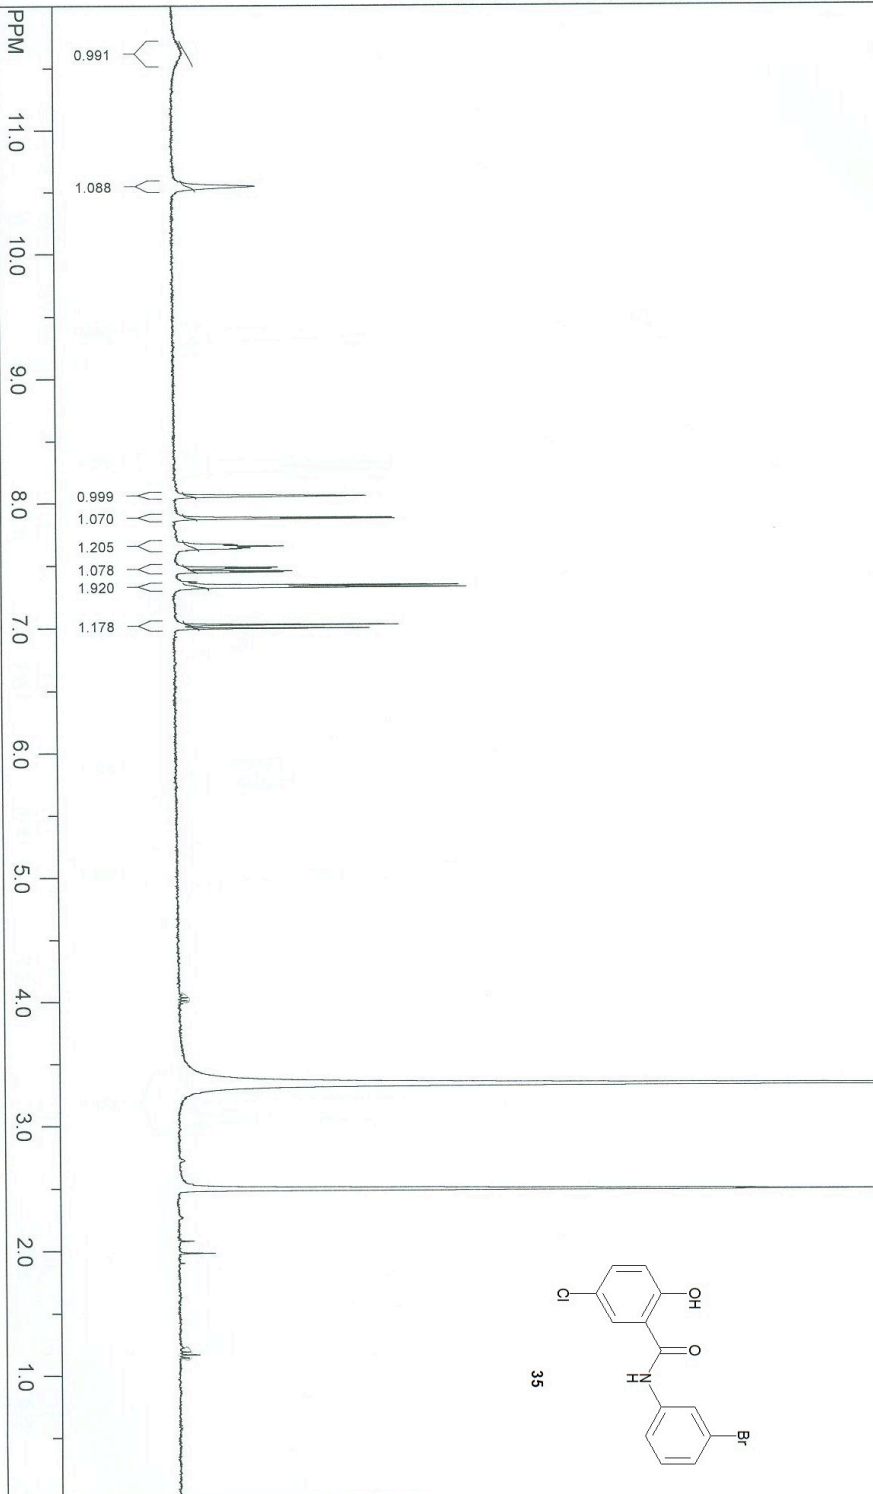

file: C:\min\KRT1179.fid\fid block# 1 expt "szpul"  
 transmitter freq.: 299.950076 MHz  
 time domain size: 19698 points  
 width: 4807.69 Hz = 16.028308 ppm = 0.244070 Hz/pt  
 number of scans: 8

freq. of 0 ppm: 299.948273 MHz  
 processed size: 65536 complex points  
 LB: 0.200 GB: 0.0000  
 HZ/cm: 143.854 ppm/cm: 0.47959

SpinWorks 2.4: KRT1176

11.6030  
11.6000  
11.5978  
11.5945  
11.5913  
11.5896  
11.5864  
11.5832

10.6212

8.2030  
7.9584  
7.8683  
7.6222  
7.5939  
7.5893  
7.5818  
7.5561  
7.4930  
7.4842  
7.4637  
7.4549  
7.0443  
7.0150

3.3474  
3.3456  
3.3445  
3.3426  
3.3404  
3.3362  
3.2874  
2.4988

1.9835

1.1682

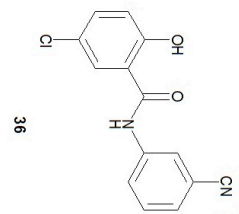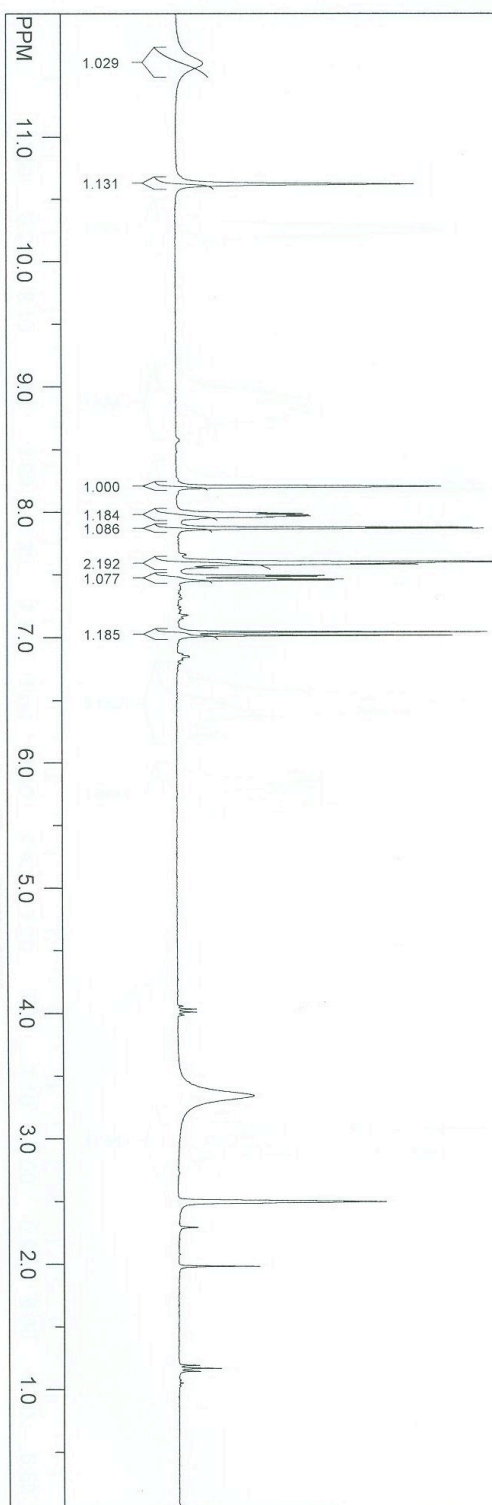

file: E:\NMR\KRT1176\fid\fid\_block#1 exp1: "s2pu1"  
transmitter freq.: 299.950076 MHz  
time domain size: 19698 points  
width: 4807.69 Hz = 16.028308 ppm = 0.244070 Hz/pt  
number of scans: 8

freq. of 0 ppm: 299.948272 MHz  
processed size: 65536 complex points  
LB: 0.000 GB: 0.0000  
Hz/cm: 143.439 ppm/cm: 0.47821

SpinWorks 2.4:

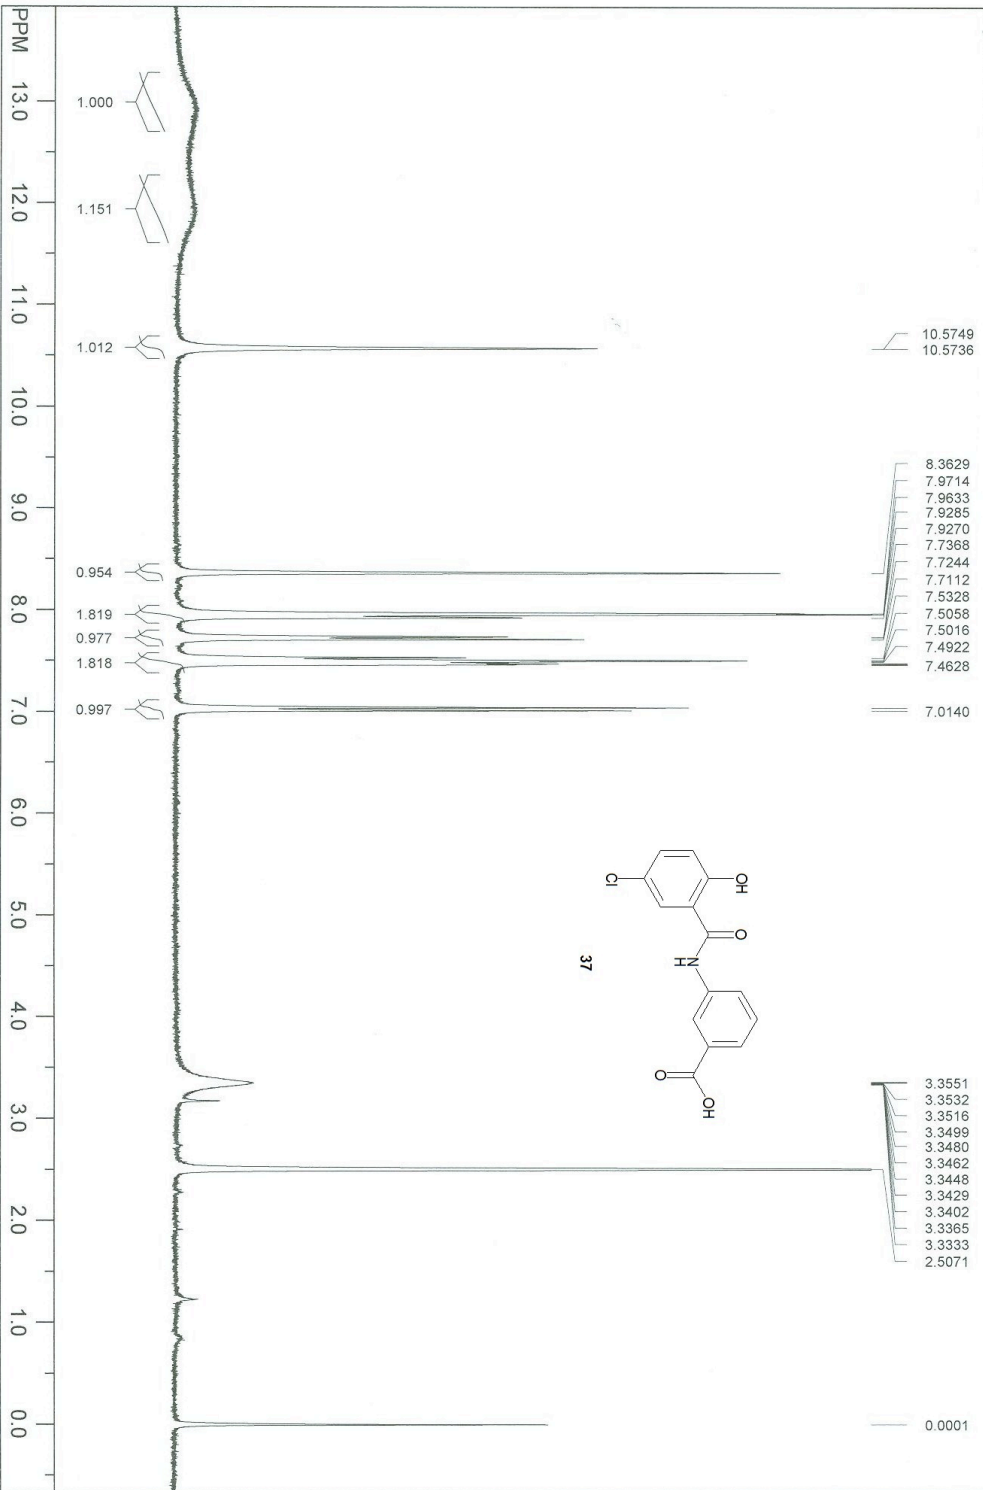

file: C:\Users\Administrator\Desktop\KRT1255.fid\fid\_block# 1 exp: "s2pul"  
 transmitter freq.: 299.970271 MHz  
 time domain size: 19698 points  
 width: 4807.69 Hz = 16.027229 ppm = 0.244070 Hz/pt  
 number of scans: 8

freq. of 0 ppm: 299.968468 MHz  
 processed size: 65536 complex points  
 LB: 0.000 GB: 0.0000  
 Hz/cm: 175.236 ppm/cm: 0.58418

SpinWorks 2.4: N-308

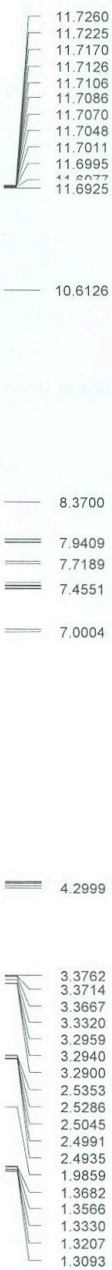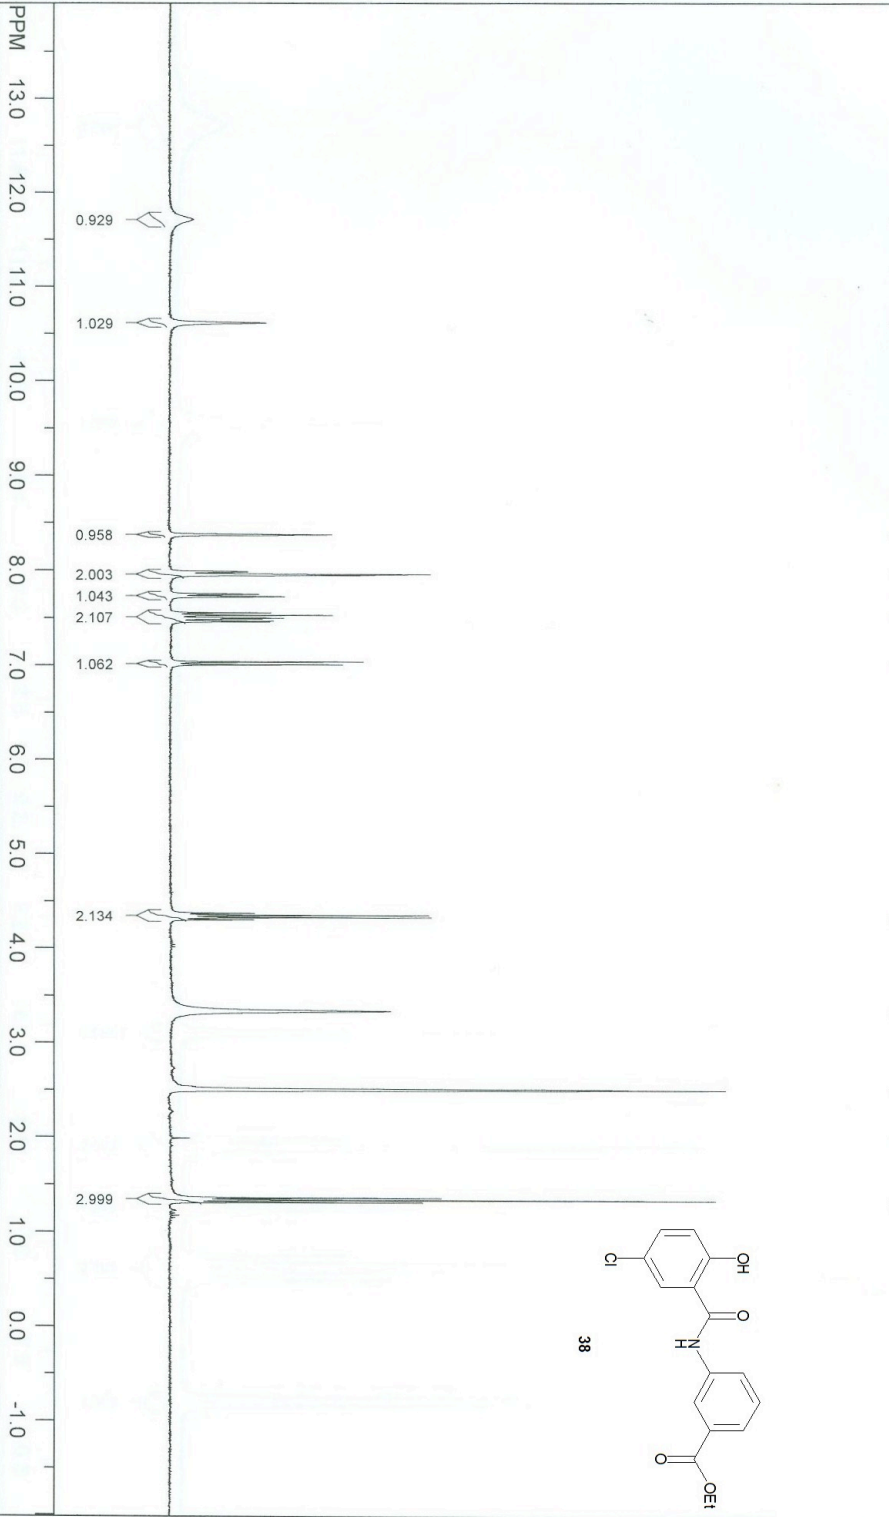

file: D:\남보리\N-308.fid\fid block# 1 exp: "s2pu"

transmitter freq.: 299.970343 MHz

time domain size: 19698 points

width: 4807.69 Hz = 16.027225 ppm = 0.244070 Hz/pt

number of scans: 8

freq. of 0 ppm: 299.968544 MHz

processed size: 65536 complex points

LB: 0.200 GB: 0.0000

HZ/cm: 192.308 ppm/cm: 0.64109

SpinWorks 2.4: KRT1276

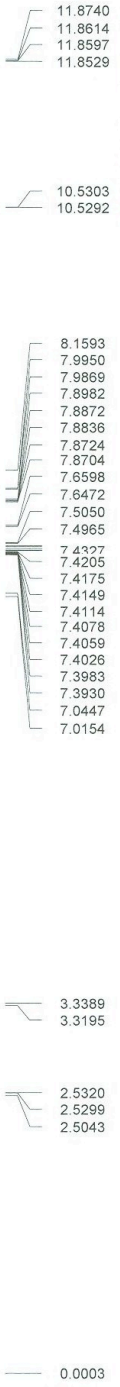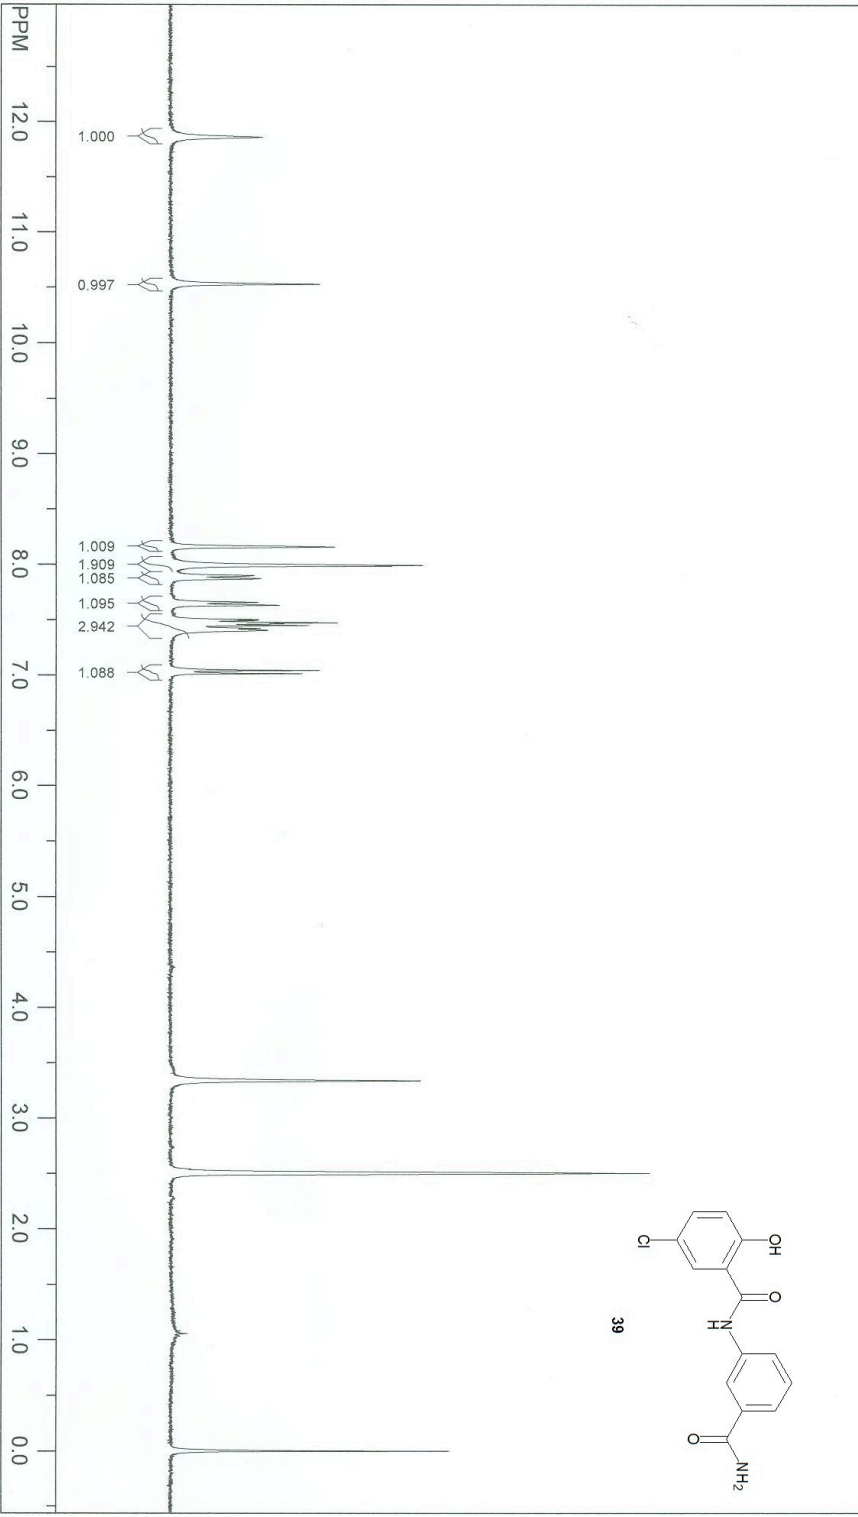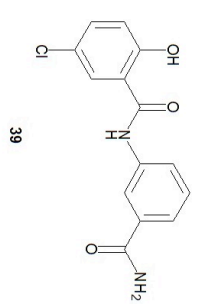

file: C:\Users\Administrator\Desktop\KRT1276.fid\fid\_block# 1 exp1 "s2pu1"  
 transmitter freq.: 299.970271 MHz  
 time domain size: 19698 points  
 width: 4807.69 Hz = 16.027229 ppm = 0.244070 Hz/pt  
 number of scans: 8  
 freq. of 0 ppm: 299.969468 MHz  
 processed size: 65536 complex points  
 LB: 0.000 GB: 0.0000  
 Hz/cm: 163.487 ppm/cm: 0.54501



KRT1841

File: Proton  
Pulse Sequence: szpu1

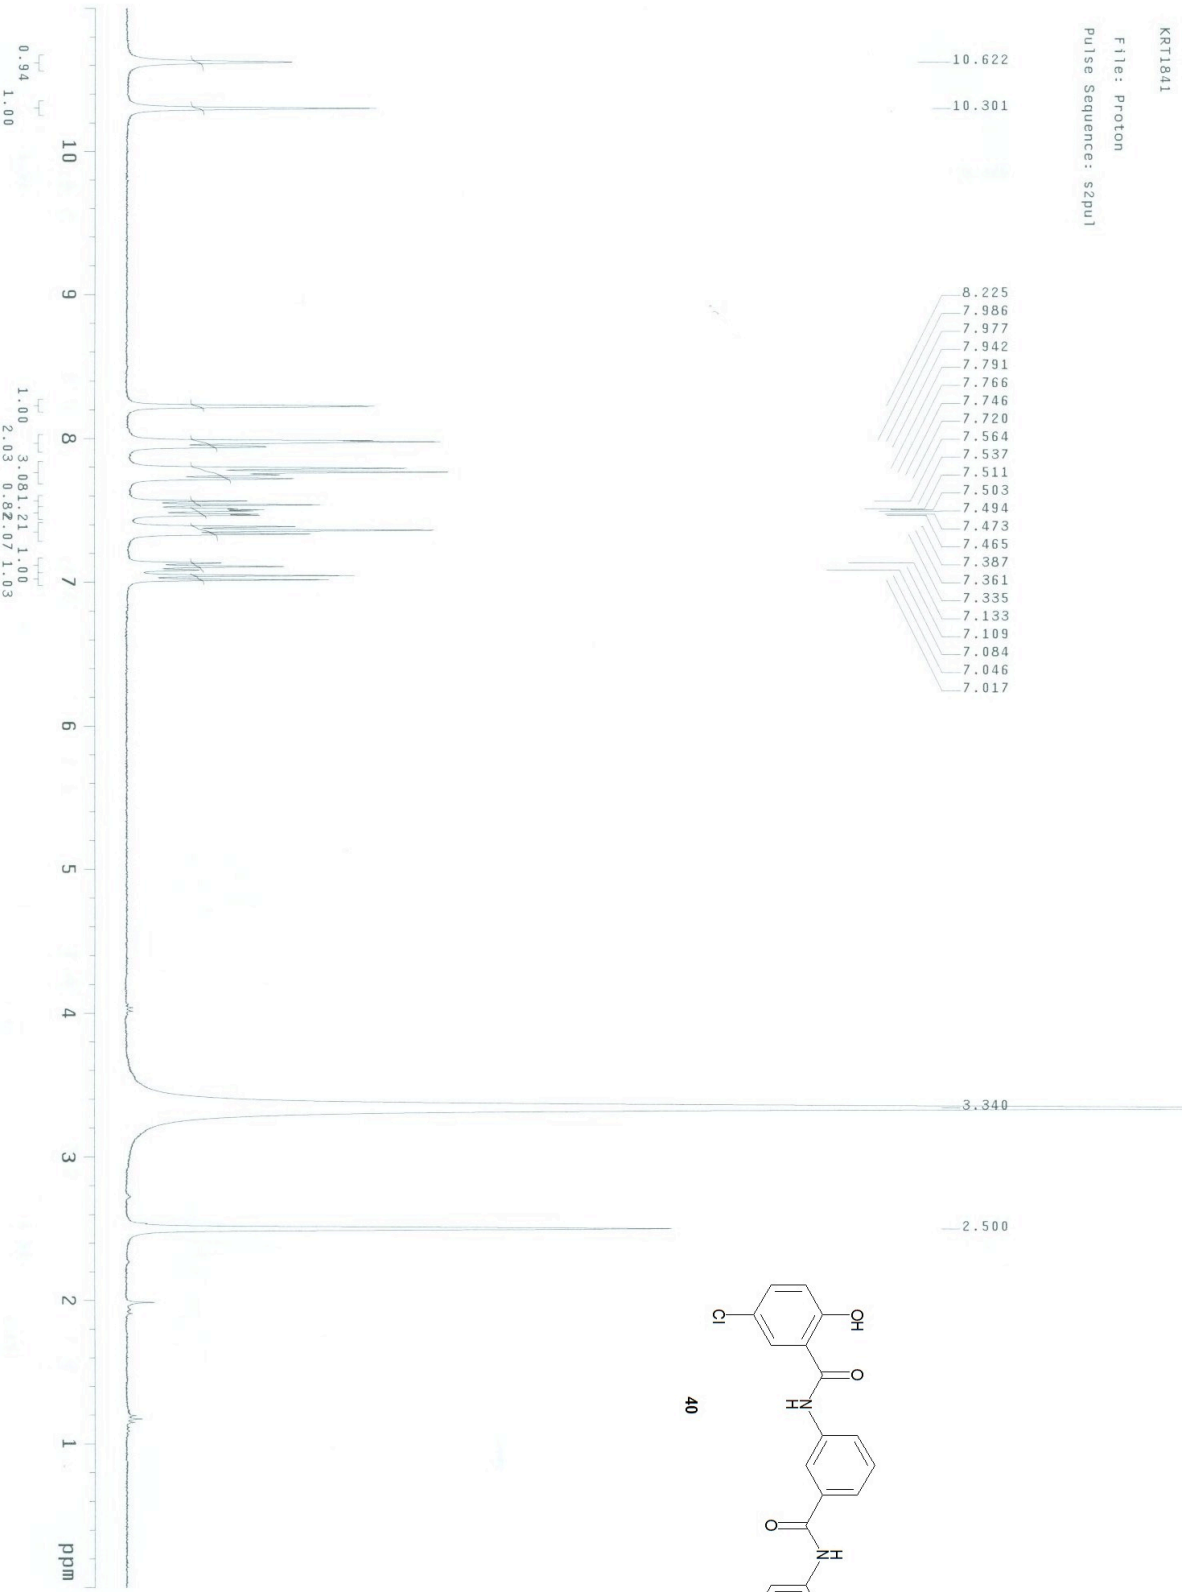

SpinWorks 2.4: KRT1165

11.8596  
11.8392  
11.8339  
11.8243  
11.8218  
11.7997  
11.7865  
11.7788  
10.5358  
10.5323  
10.5303  
10.5285  
10.5270  
10.5188  
10.5139  
10.4680

7.9312  
7.6837  
7.4395  
7.1778  
6.9913

3.1229  
2.9023  
2.7209  
2.4457  
2.4375  
2.4328  
2.4296  
2.2772  
2.2752  
2.2721  
2.2699  
2.2682  
2.2650  
2.2636  
1.9093

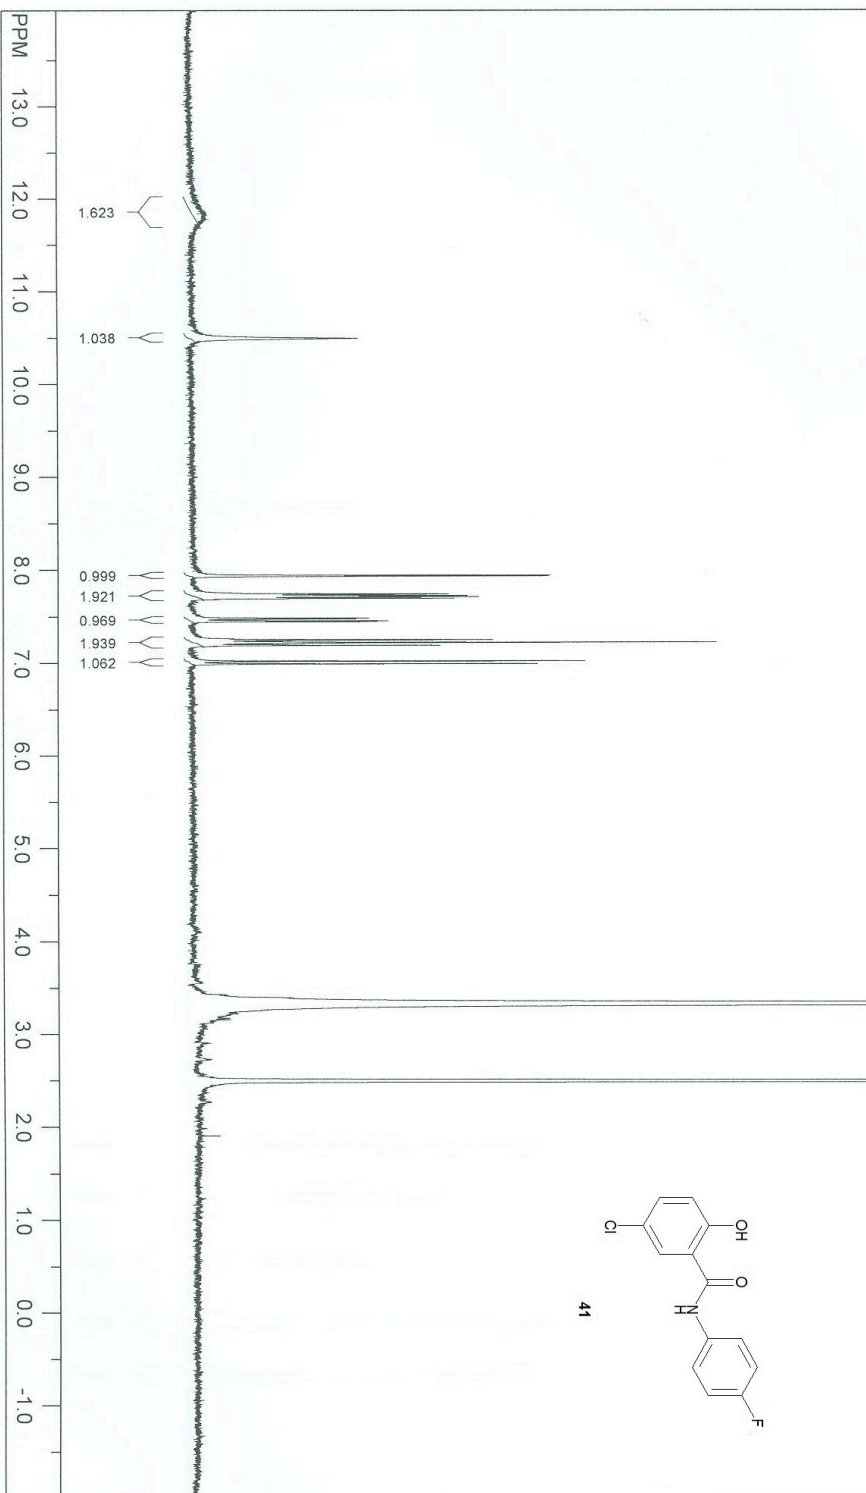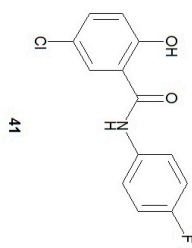

file: C:\min\KRT1165.fid\fid block# 1 exp: "s2pu"  
transmitter freq.: 299.950076 MHz  
time domain size: 19698 points  
width: 4807.69 Hz = 16.028308 ppm = 0.244070 Hz/pt  
number of scans: 8

freq. of 0 ppm: 299.948289 MHz  
processed size: 65536 complex points  
LB: 0.200 GB: 0.0000  
HZ/cm: 192.308 ppm/cm: 0.64113

SpinWorks 2.4: N-340

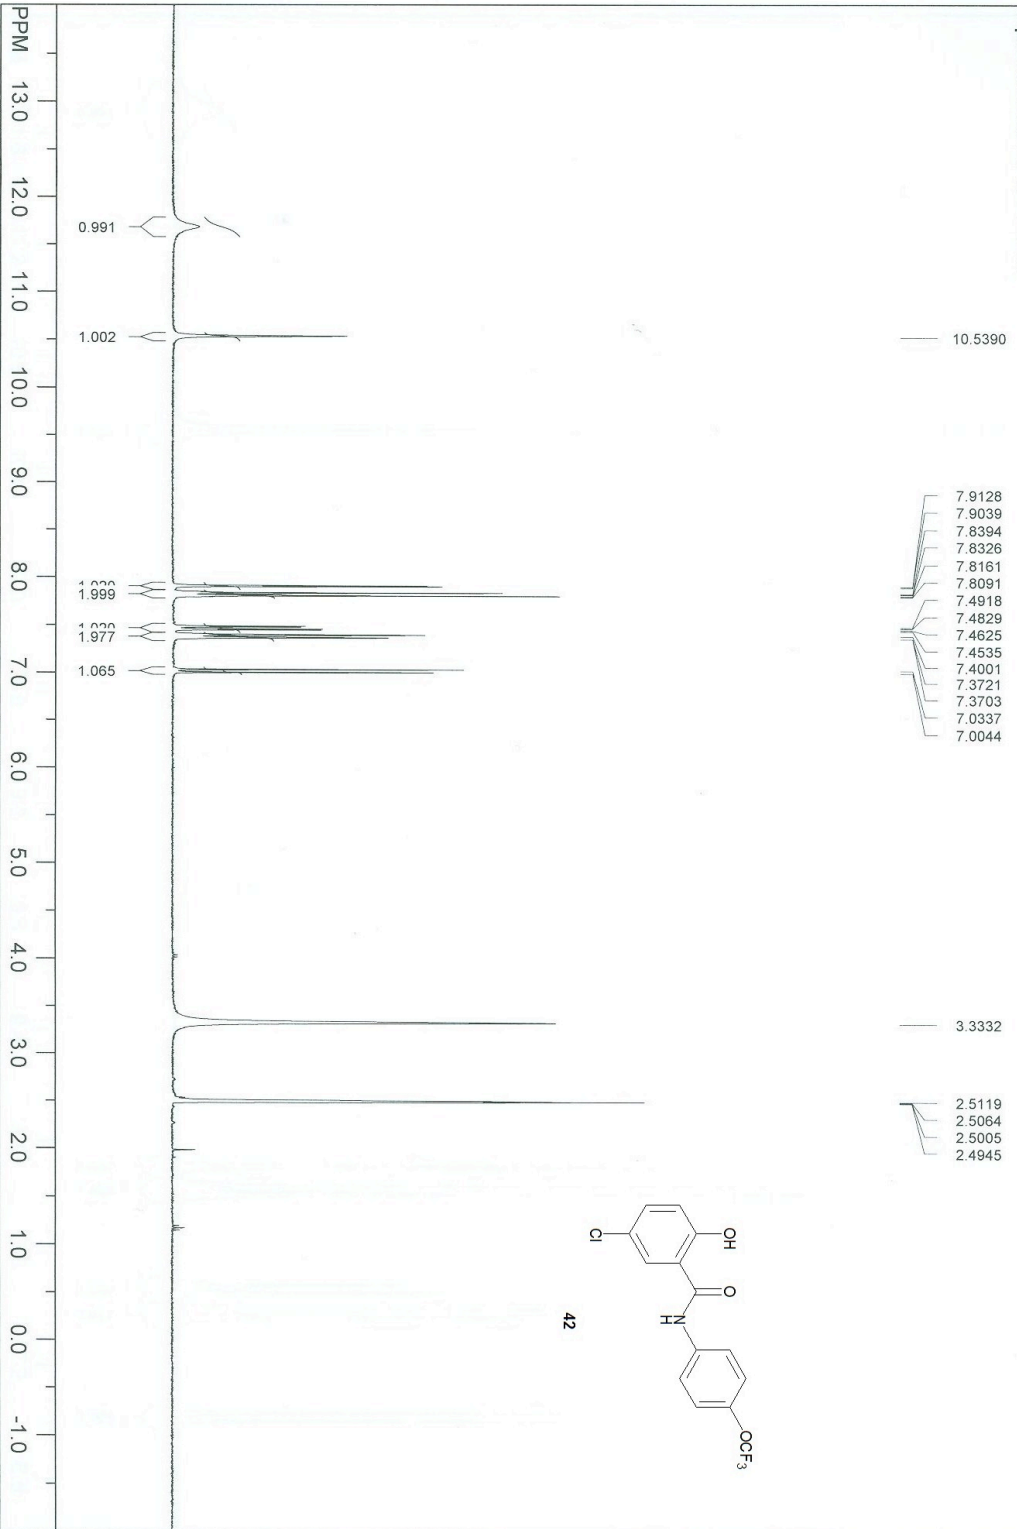

file: C:\Documents and Settings\한국화학연구원\바탕 화면\NMR-bora\N-340.fid fid block# 1 exp1: "s2pu" freq: of 0 ppm: 299.968543 MHz  
transmitter freq: 299.970343 MHz  
time domain size: 19698 points  
width: 4807.69 Hz = 16.027225 ppm = 0.244070 Hz/pt  
number of scans: 8

processed size: 65536 complex points  
LB: 0.200 GB: 0.0000  
Hz/cm: 192.308 ppm/cm: 0.64109

SpinWorks 2.4: KRT1180

10.8328  
10.8313  
10.8279  
10.8249

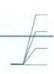

7.9306  
7.9017  
7.8452  
7.8235  
7.8159  
7.4745  
7.4660  
7.4454  
7.4367

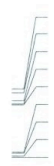

7.0298  
7.0005

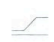

3.4761  
3.4741  
3.4716  
3.4679  
3.4658  
3.4617  
3.4596  
3.4579

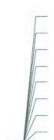

3.2859  
3.2821  
3.2784  
3.2769  
3.2712  
3.2693  
3.2644  
3.2596  
3.2554  
3.2535  
3.2498  
2.5000

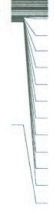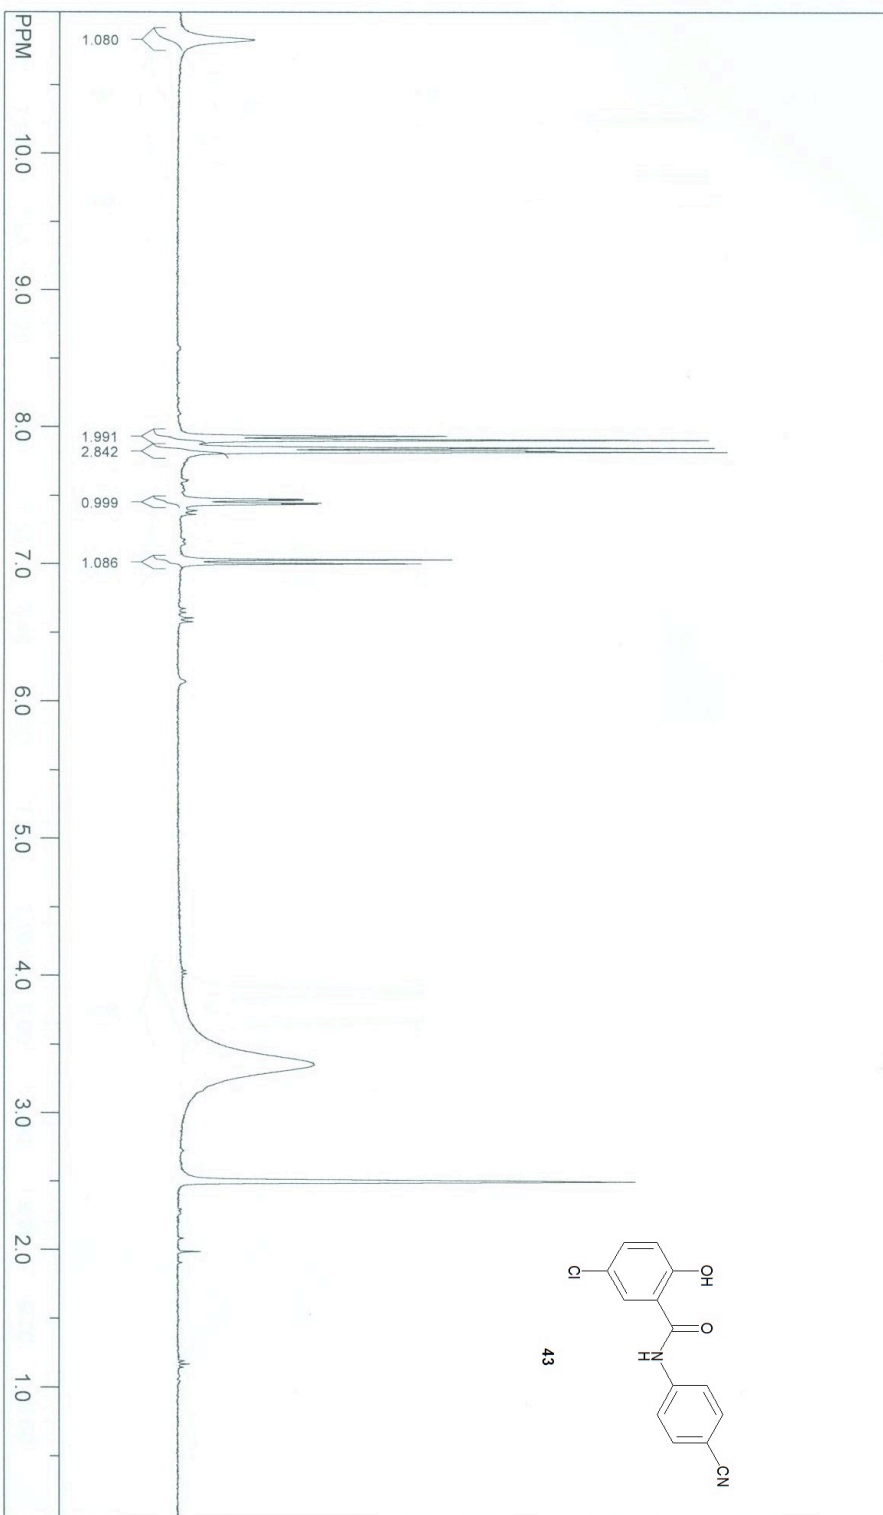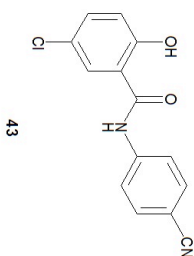

file: E:\바탕\KRT1180.fid\fid block# 1 expt: "s2pu"  
transmitter freq.: 299.950076 MHz  
time domain size: 19698 points  
width: 4807.69 Hz = 16.028308 ppm = 0.244070 Hz/pi  
number of scans: 8

freq. of 0 ppm: 299.948273 MHz  
processed size: 65536 complex points  
LB: 0.000 GB: 0.0000  
Hz/cm: 132.278 ppm/cm: 0.44100



SpinWorks 2.4: KRT1174

- 11.9677
- 11.9661
- 11.9645
- 11.9621
- 11.9597
- 11.9562
- 10.3757
- 7.9889
- 7.9802
- 7.6210
- 7.5922
- 7.4869
- 7.4782
- 7.4577
- 7.4489
- 7.4021
- 7.3733
- 7.0192
- 6.9898

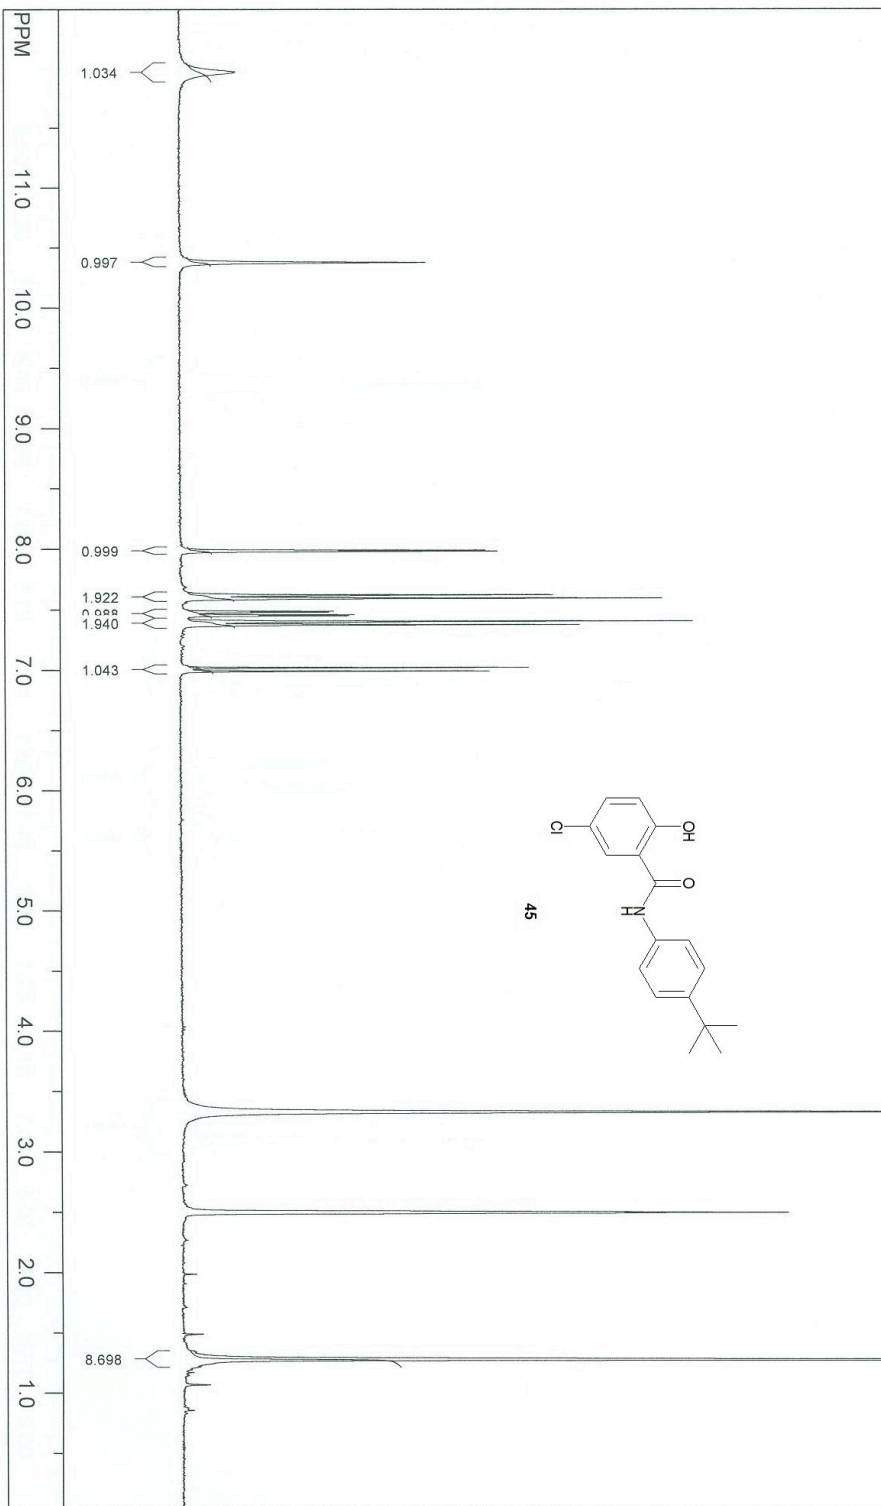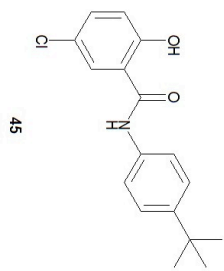

file: C:\p1\KRT1174.fid\td block# 1 exp: 'szpu'  
transmitter freq.: 299.950076 MHz  
time domain size: 19698 points  
width: 4807.69 Hz = 16.028308 ppm = 0.244070 Hz/pt  
number of scans: 8

freq. of 0 ppm: 299.948273 MHz  
processed size: 65536 complex points  
LB: 0.200 GB: 0.0000  
HZ/cm: 149.554 ppm/cm: 0.49860

SpinWorks 2.4: KRT1043

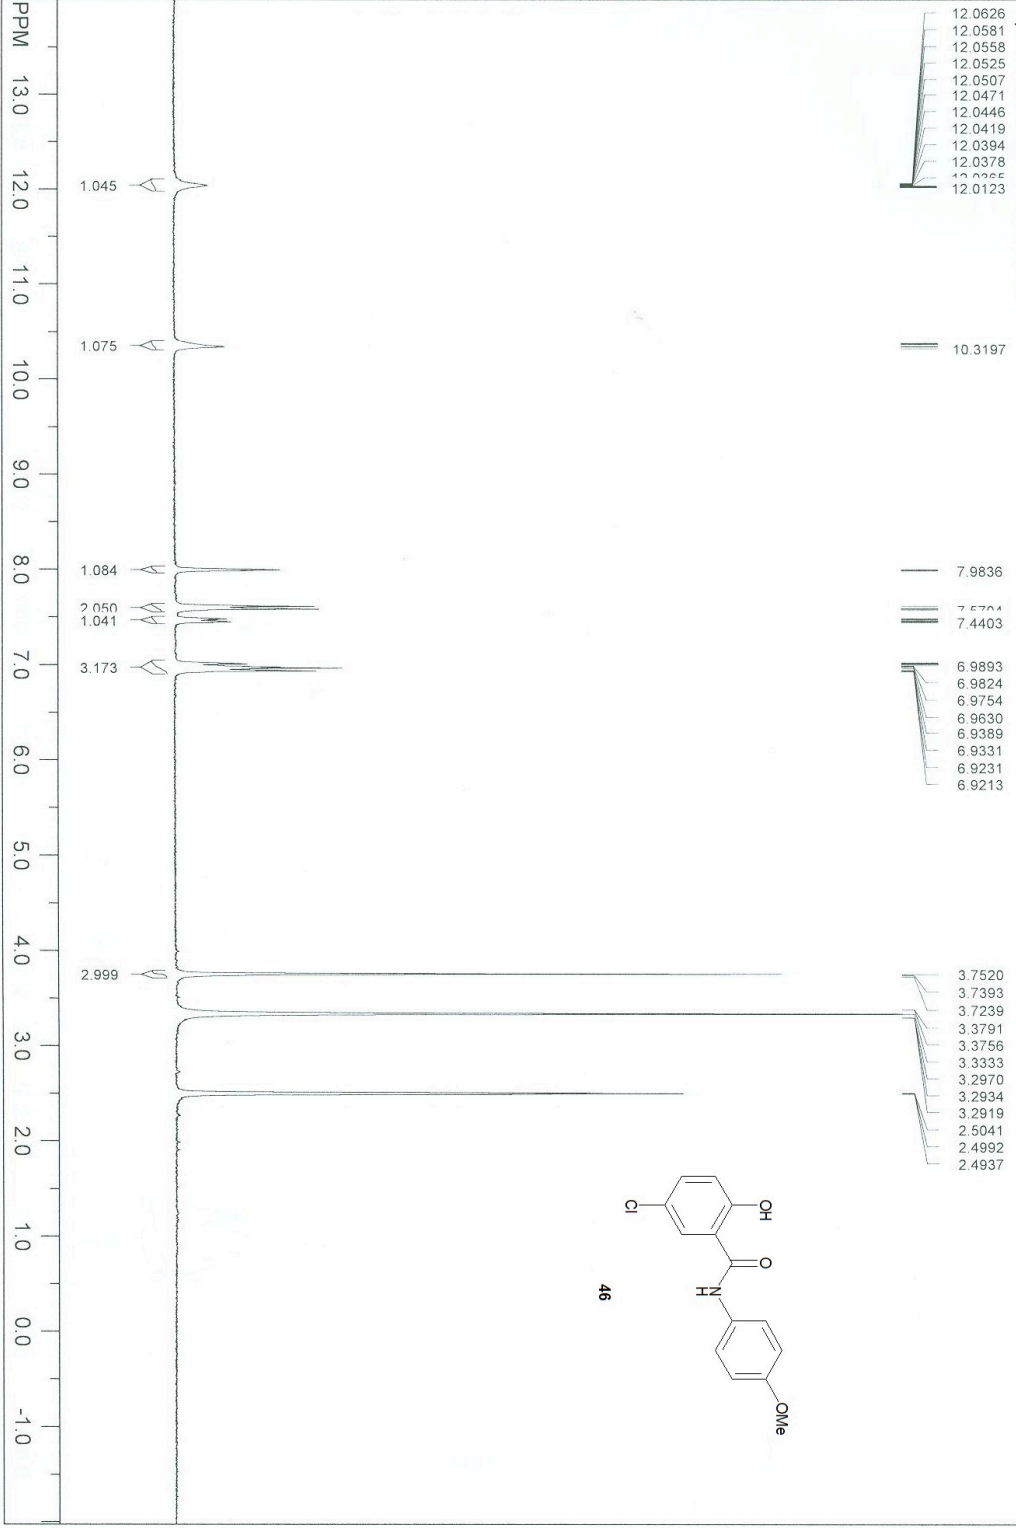

file: E:\민환\KRT1043\fid\fid\_block# 1 exp: "szpu"  
transmitter freq.: 299.950076 MHz  
time domain size: 19698 points  
width: 4807.69 Hz = 16.028308 ppm = 0.244070 Hz/pt  
number of scans: 8

freq. of 0 ppm: 299.9448280 MHz  
processed size: 65536 complex points  
LB: 0.000 GB: 0.0000  
Hz/cm: 192.308 ppm/cm: 0.64113

SpinWorks 2.4: KRT1264-DMSO

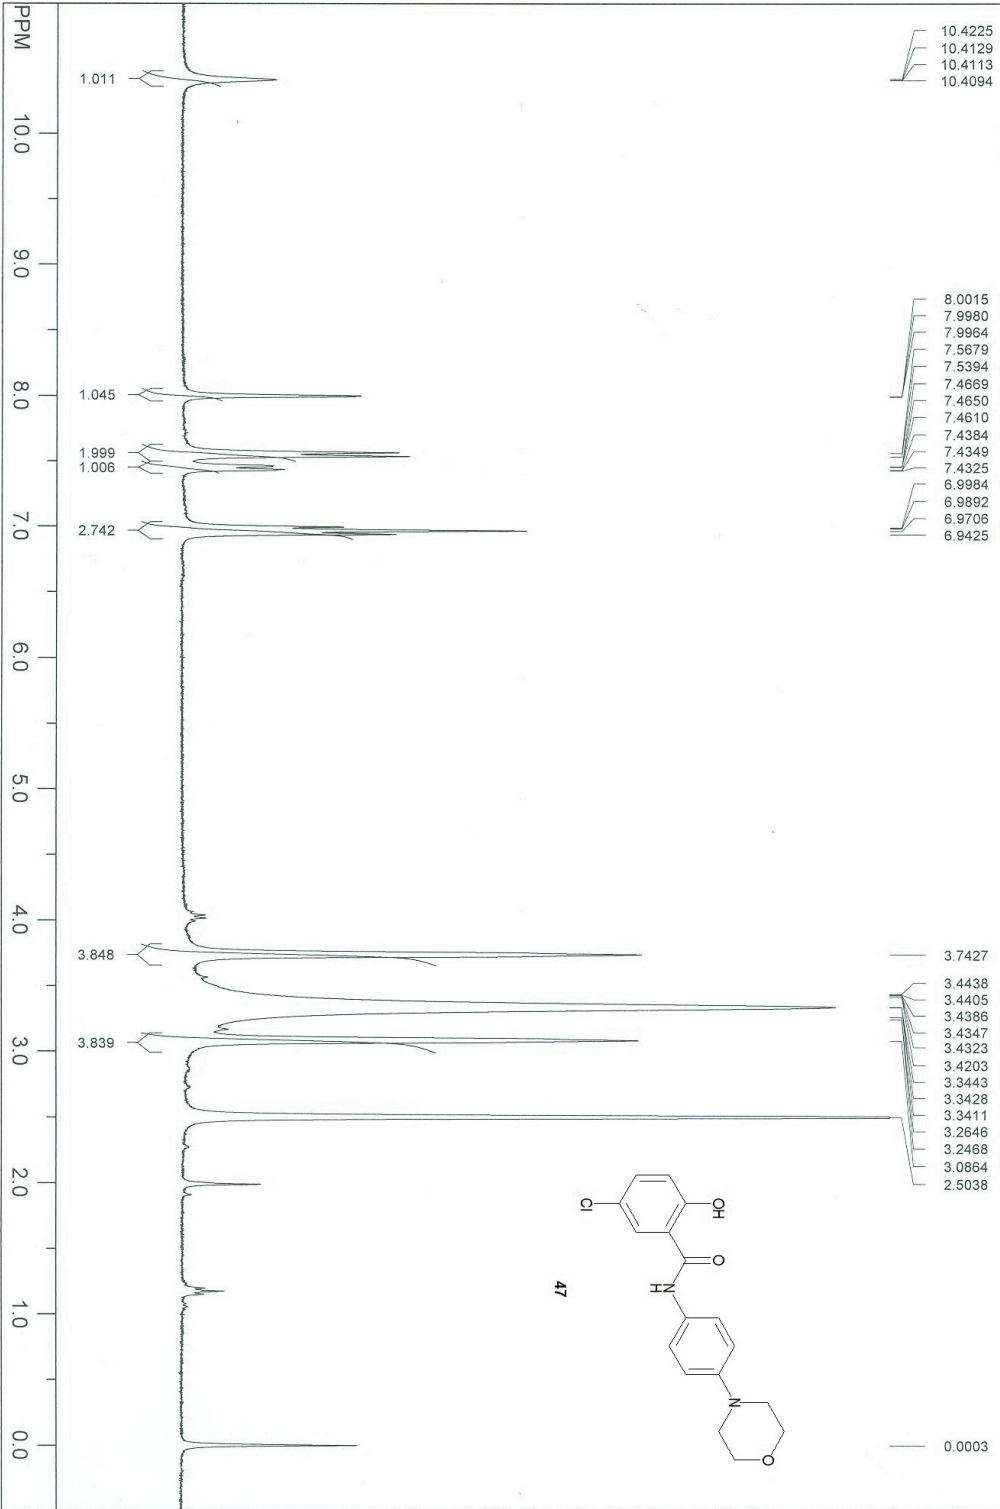

file: C:\Users\윤민환\Desktop\KRT1264-DMSO-121006.fid  
transmitter freq.: 299.970271 MHz  
time domain size: 13698 points  
width: 4807.69 Hz = 16.027229 ppm = 0.244070 Hz/pt  
number of scans: 64

freq. of 0 ppm: 299.968470 MHz  
processed size: 65536 complex points  
LB: 0.000 GB: 0.0000  
Hz/cm: 137.878 ppm/cm: 0.45964



SpinWorks 2.4: KRT1277

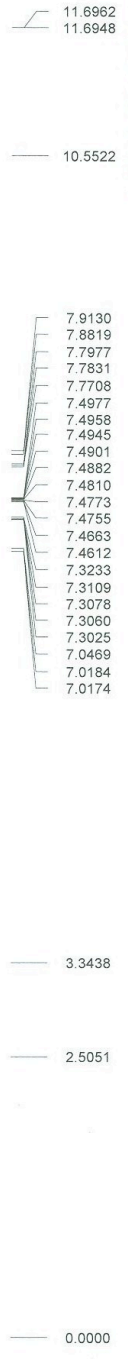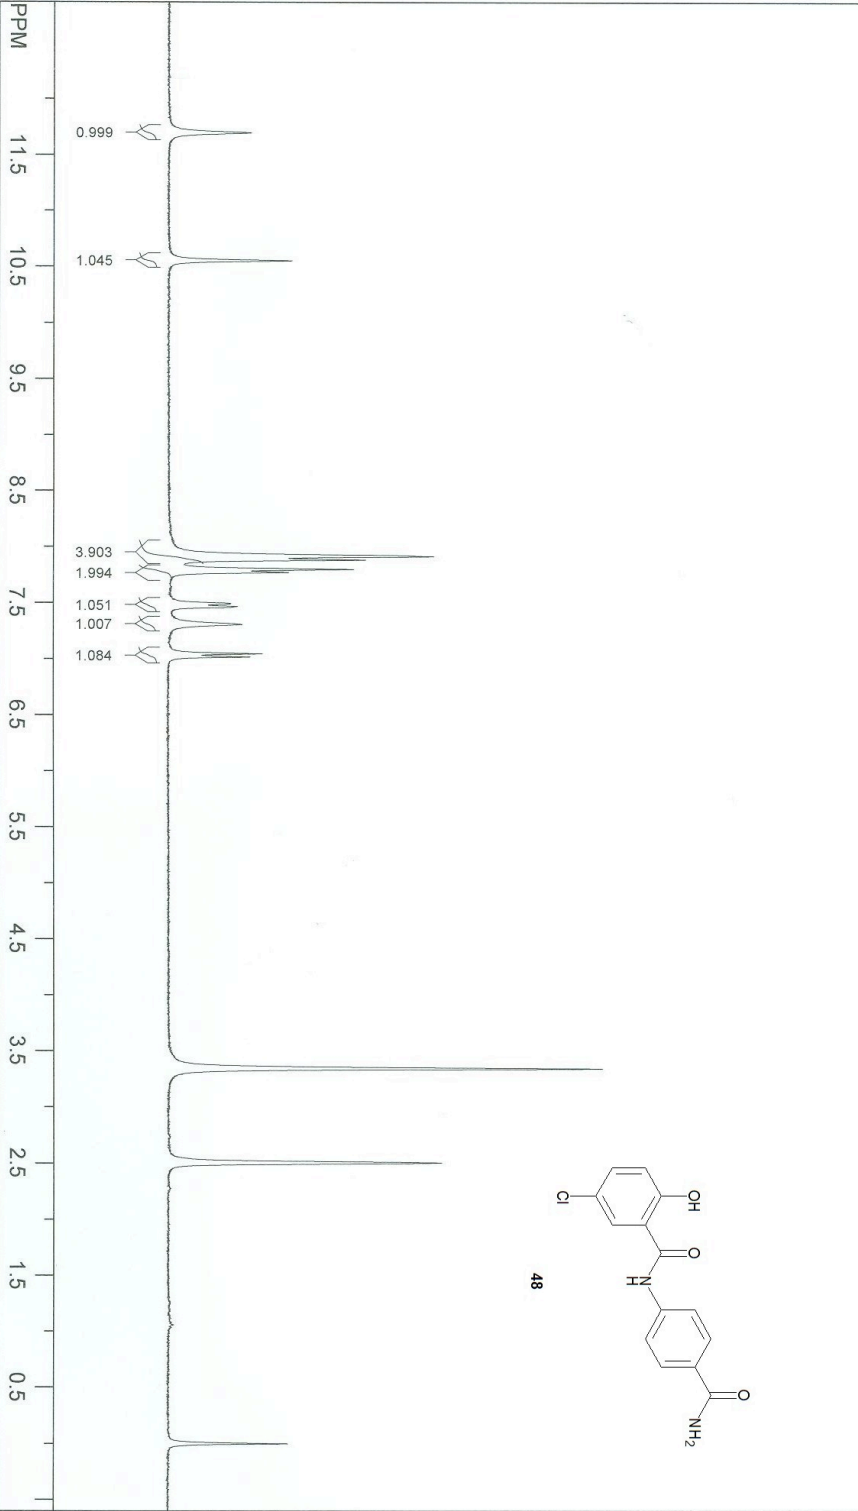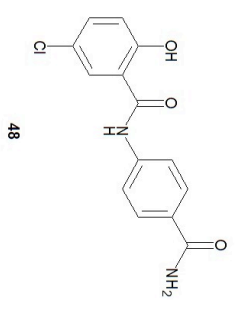

file: C:\Users\Administrator\Desktop\KRT1277.fid\tdi block# 1 exp1: "s2pul"  
 transmitter freq.: 299.970271 MHz  
 time domain size: 19698 points  
 width: 4807.69 Hz = 16.027229 ppm = 0.244070 Hz/pt  
 number of scans: 8  
 freq. of 0 ppm: 299.968470 MHz  
 processed size: 65536 complex points  
 LB: 0.000 GB: 0.0000  
 Hz/cm: 161.579 ppm/cm: 0.53985

SpinWorks 2.4: 0615-2

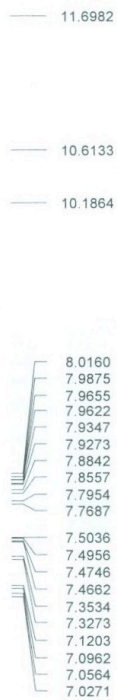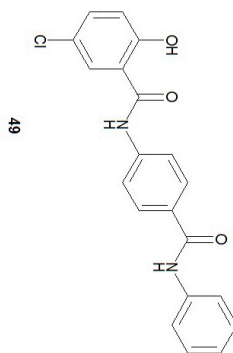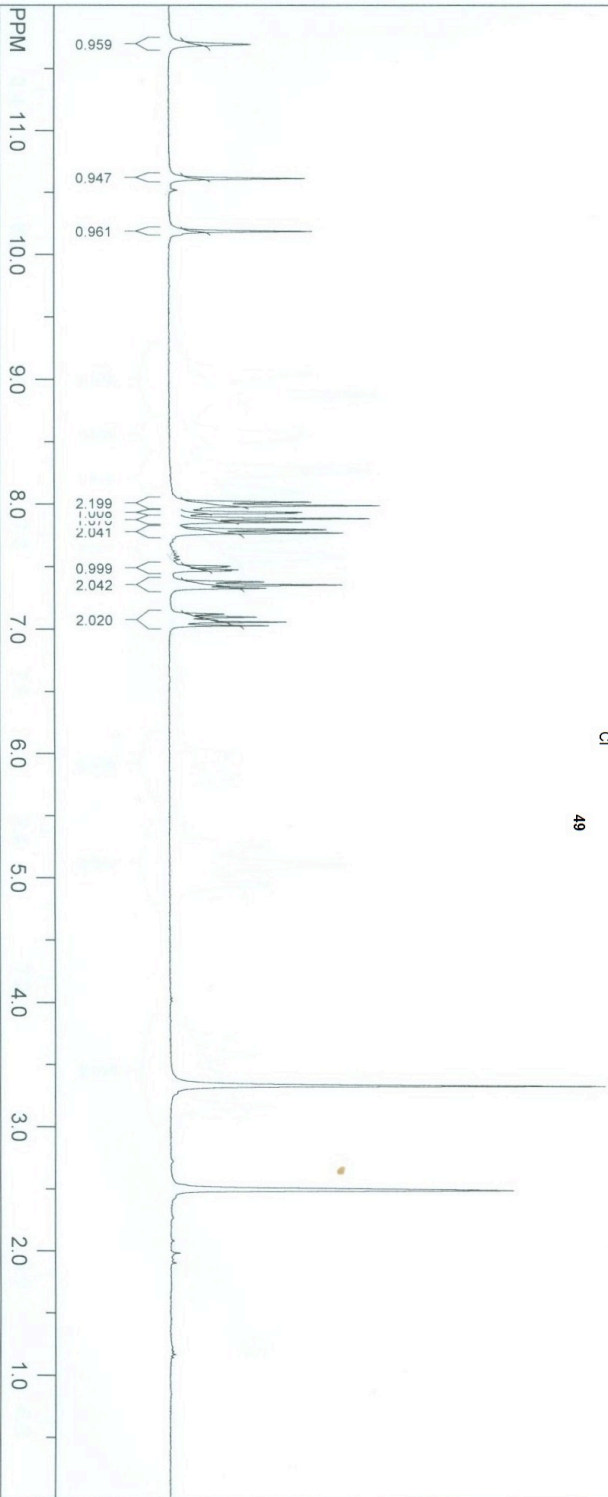

file: C:\1\0615-2.fid\fid block# 1 expt: "szpu"  
 transmitter freq.: 299.970343 MHz  
 time domain size: 19698 points  
 width: 4807.69 Hz = 16.027225 ppm = 0.244070 Hz/pt  
 number of scans: 8

freq. of 0 ppm: 299.968544 MHz  
 processed size: 65536 complex points  
 LB: 0.200 GB: 0.0000  
 Hz/cm: 144.189 ppm/cm: 0.48068

KR1831-1

File: Proton  
Pulse Sequence: s2pu1

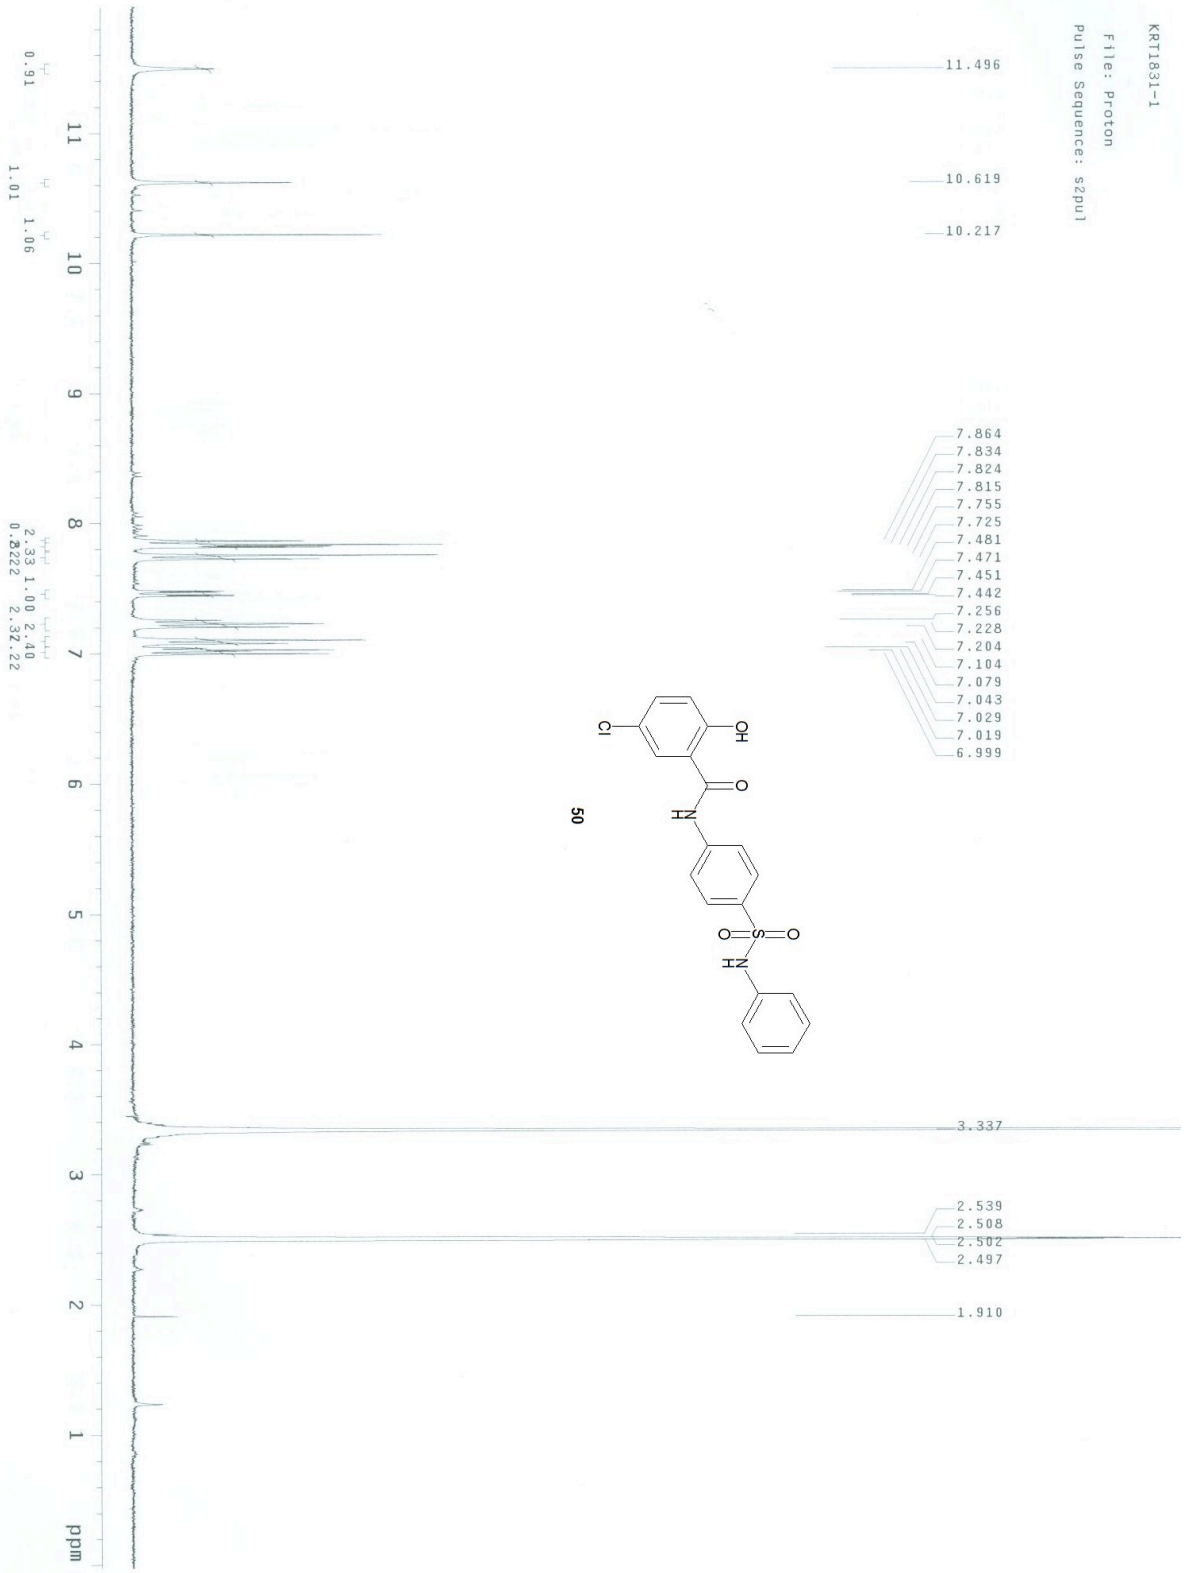

SpinWorks 2.4: KRT1826

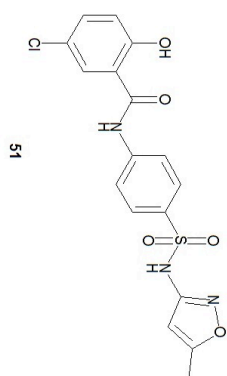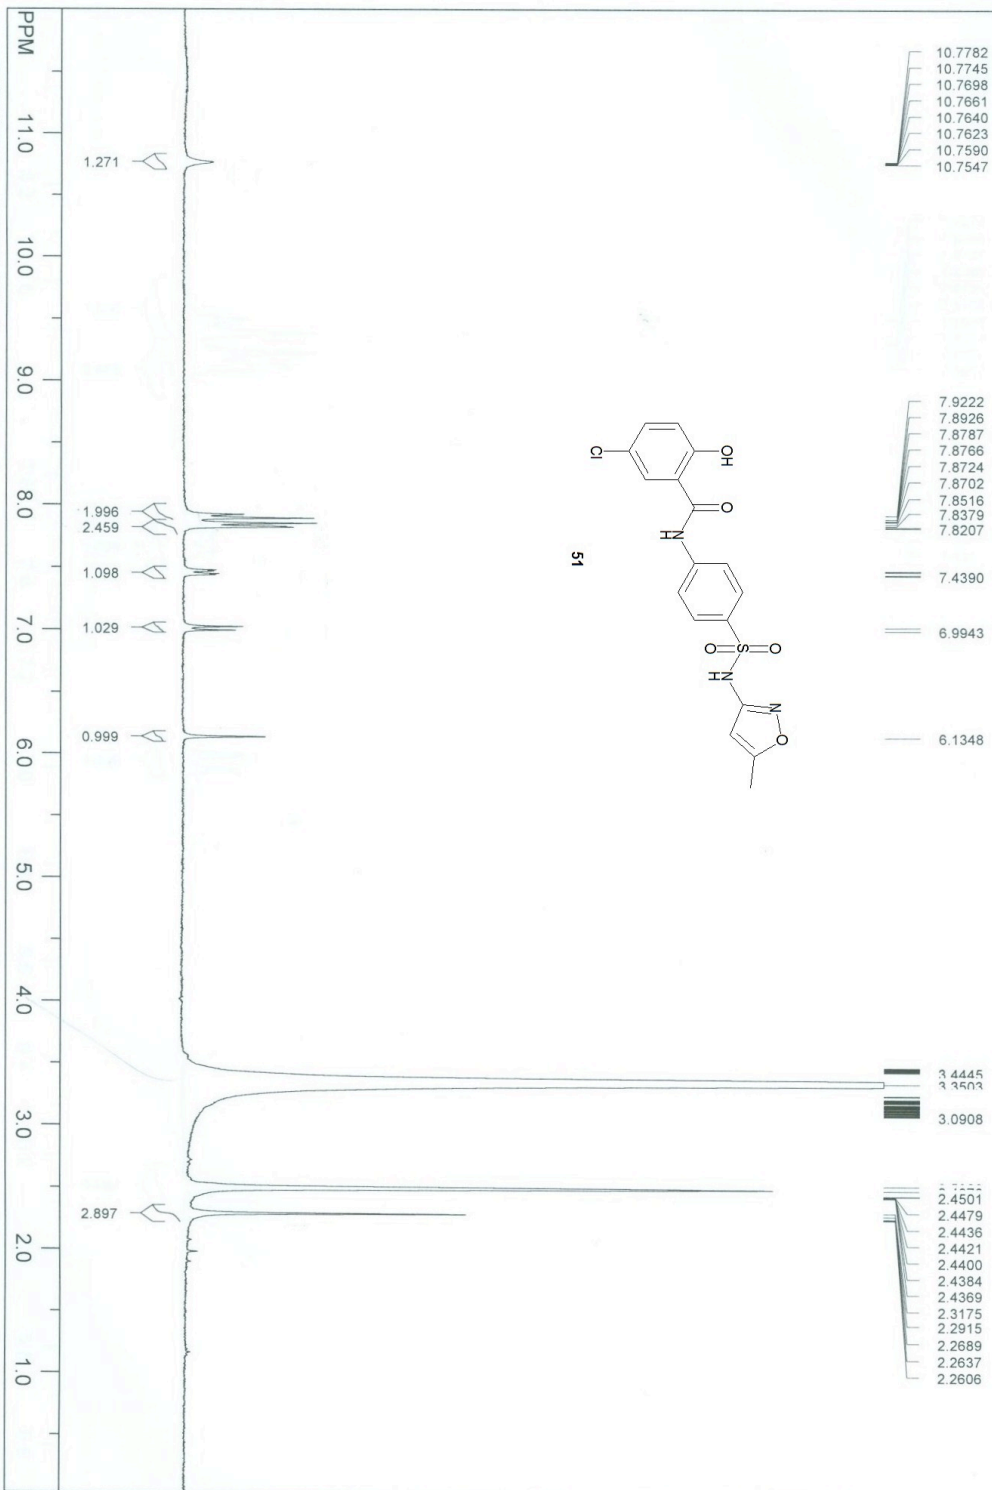

file: D:\민환\민환\NMR\Run\KRT1826\fid\fid\_block# 1 exp1 "s2pul"  
 transmitter freq.: 299.970343 MHz  
 time domain size: 19698 points  
 width: 4807.69 Hz = 16.027225 ppm = 0.244070 Hz/pt  
 number of scans: 8

freq. of 0 ppm: 299.968545 MHz  
 processed size: 65536 complex points  
 LB: 0.200 GB: 0.0000  
 Hz/cm: 143.741 ppm/cm: 0.47918

SpinWorks 2.4: KRT1187

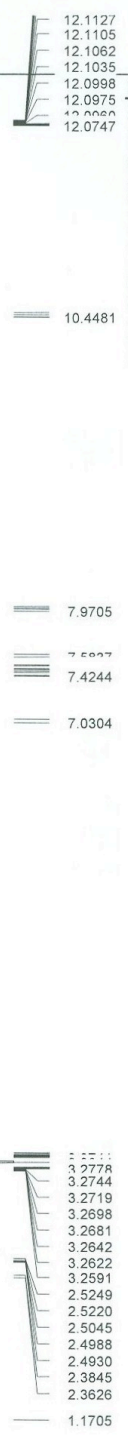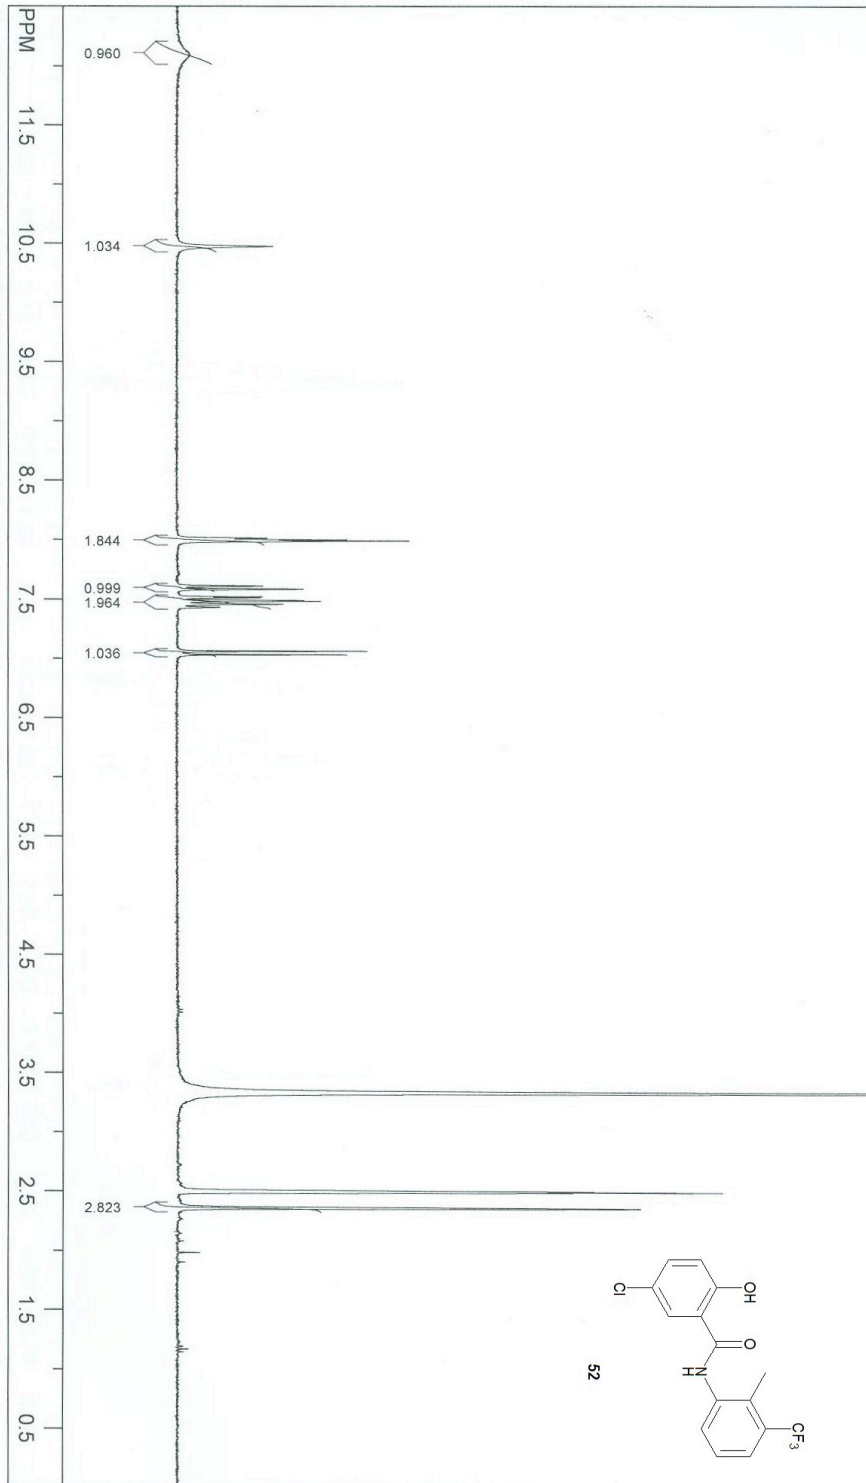

file: C:\Documents and Settings\김영준\104호\네임 화면\검경화\8.fid\fid block# 1 exp: "s2pu"

transmitter freq.: 299.950076 MHz

time domain size: 19698 points

width: 4807.69 Hz = 16.028308 ppm = 0.244070 Hz/pt

number of scans: 8

freq. of 0 ppm: 299.948275 MHz

processed size: 65536 complex points

LB: 0.000 GB: 0.0000

HZ/cm: 150.075 ppm/cm: 0.50033

SpinWorks 2.4: KRT-1843 in DMSO

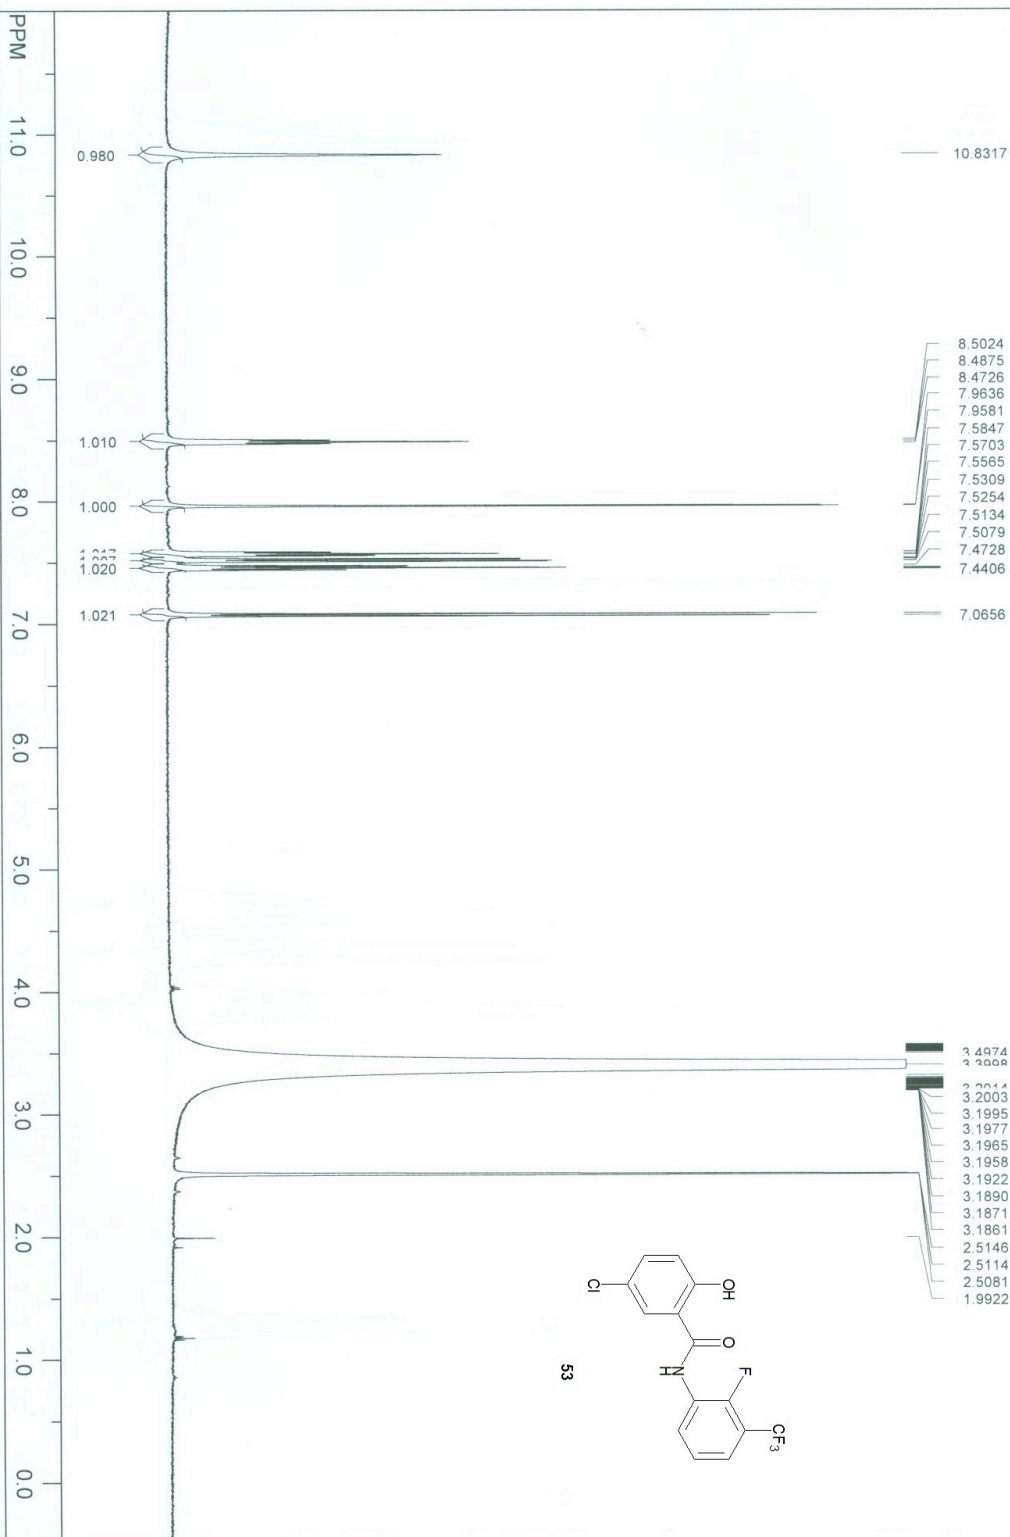

file: C:\Users\Administrator\Desktop\KRT-1843\2\fid exp1 <zg30>  
 transmitter freq.: 500.133251 MHz  
 time domain size: 65536 points  
 width: 7507.51 Hz = 15.011015 ppm = 0.114555 Hz/pt  
 number of scans: 16

freq. of 0 ppm: 500.130000 MHz  
 processed size: 32768 complex points  
 LB: 0.300 GB: 0.0000  
 Hz/cm: 250.433 ppm/cm: 0.50073

SpinWorks 2.4: KRT1162-1

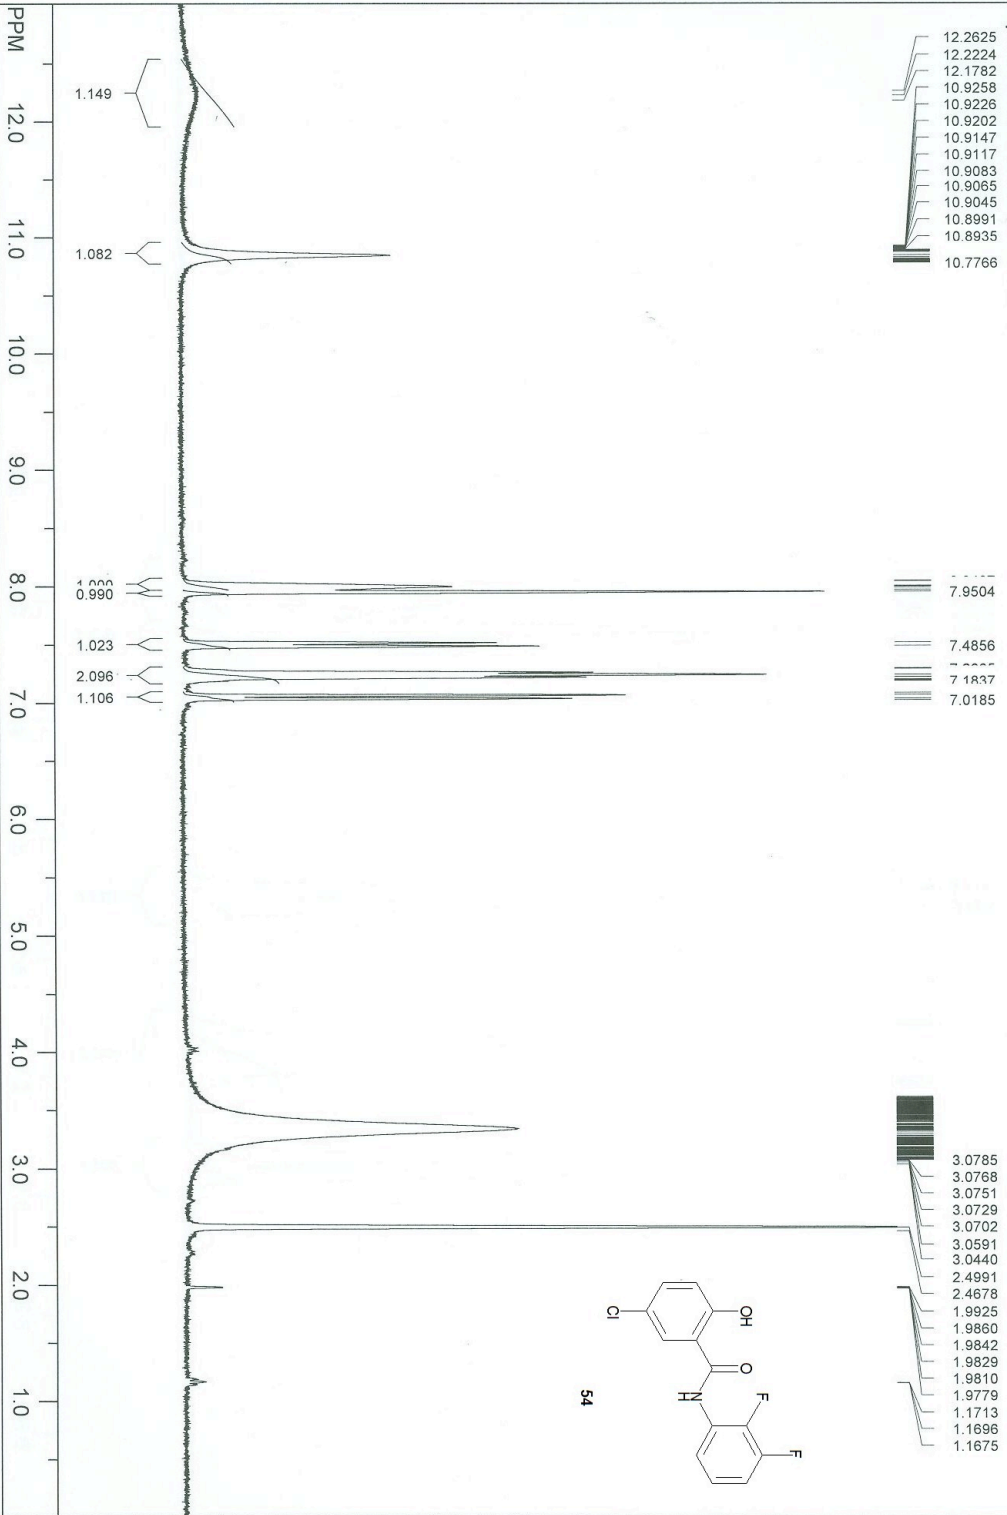

file: C:\man\KRT1162-1.fid\fid block# 1 expt: "szpu"  
 transmitter freq.: 299.950076 MHz  
 time domain size: 19698 points  
 width: 4807.69 Hz = 16.028308 ppm = 0.244070 Hz/pt  
 number of scans: 8

freq. of 0 ppm: 299.948190 MHz  
 processed size: 65536 complex points  
 LB: 0.200 GB: 0.0000  
 Hz/cm: 156.093 ppm/cm: 0.52040

SpinWorks 2.4: KRT1812-1

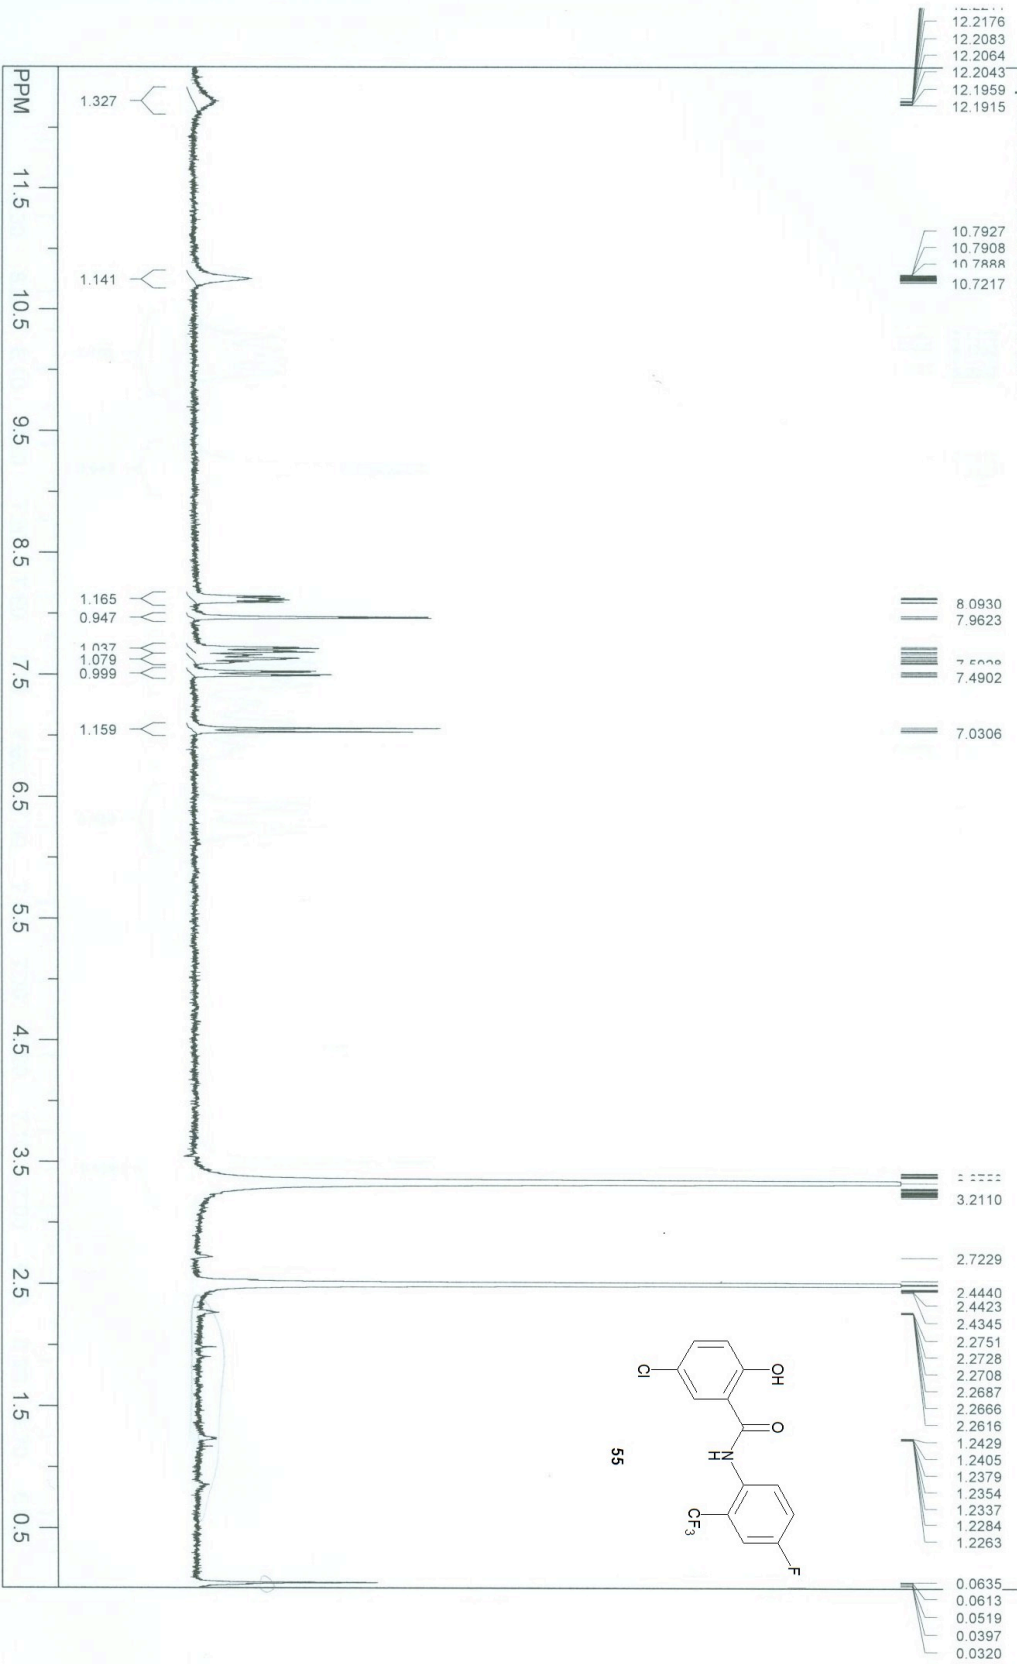

file: C:\min\KRT1812-1.fid\fid block# 1 exp: "s2pu"

transmitter freq.: 299.970343 MHz

time domain size: 19698 points

width: 4807.69 Hz = 16.027225 ppm = 0.244070 Hz/pt

number of scans: 8

freq. of 0 ppm: 299.968544 MHz

processed size: 65536 complex points

LB: 0.200 GB: 0.0000

HZ/cm: 149.889 ppm/cm: 0.49868



KR11816-1

File: Proton

Pulse Sequence: szpu1

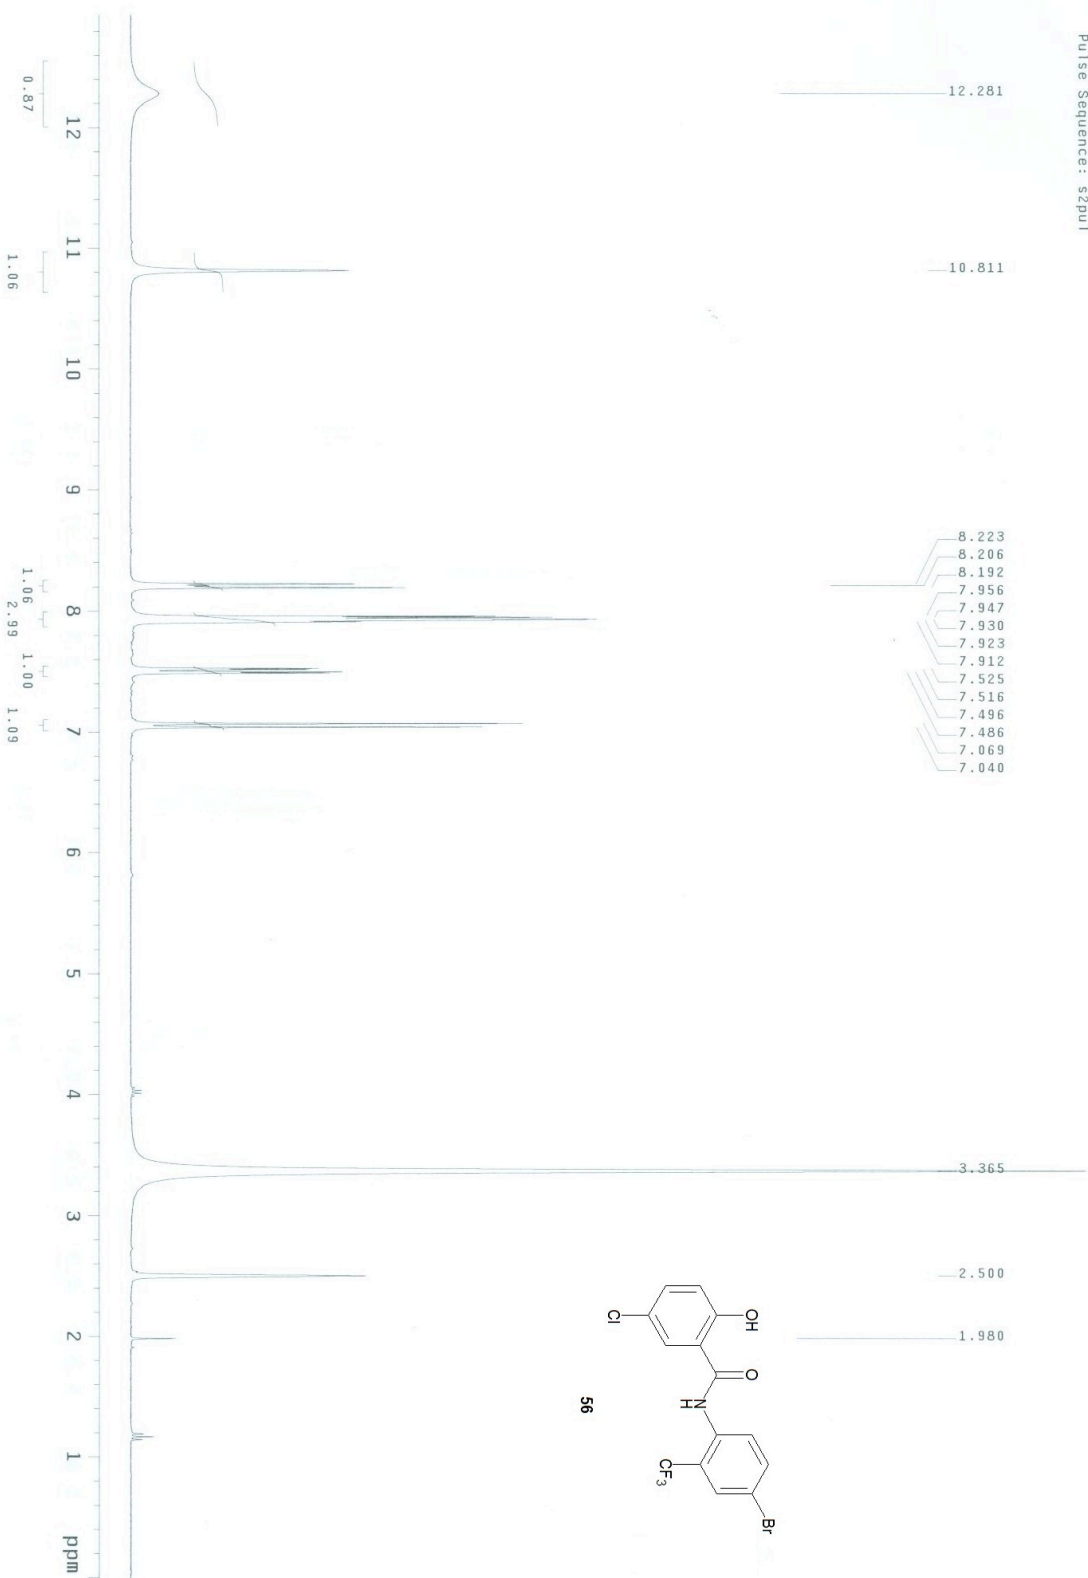

SpinWorks 2.4: N-331

12.4774  
12.4757  
12.4736  
12.4721  
12.4687  
12.4654  
12.4636

11.2222

8.7929  
8.7642  
8.0468  
8.0422  
8.0294  
8.0201  
7.8563  
7.8510  
7.8271  
7.8221  
7.5999  
7.5904  
7.5707  
7.5612  
7.1568  
7.1276

3.3856

2.5632  
2.5576  
2.5517  
2.5458

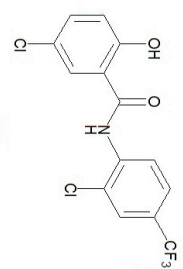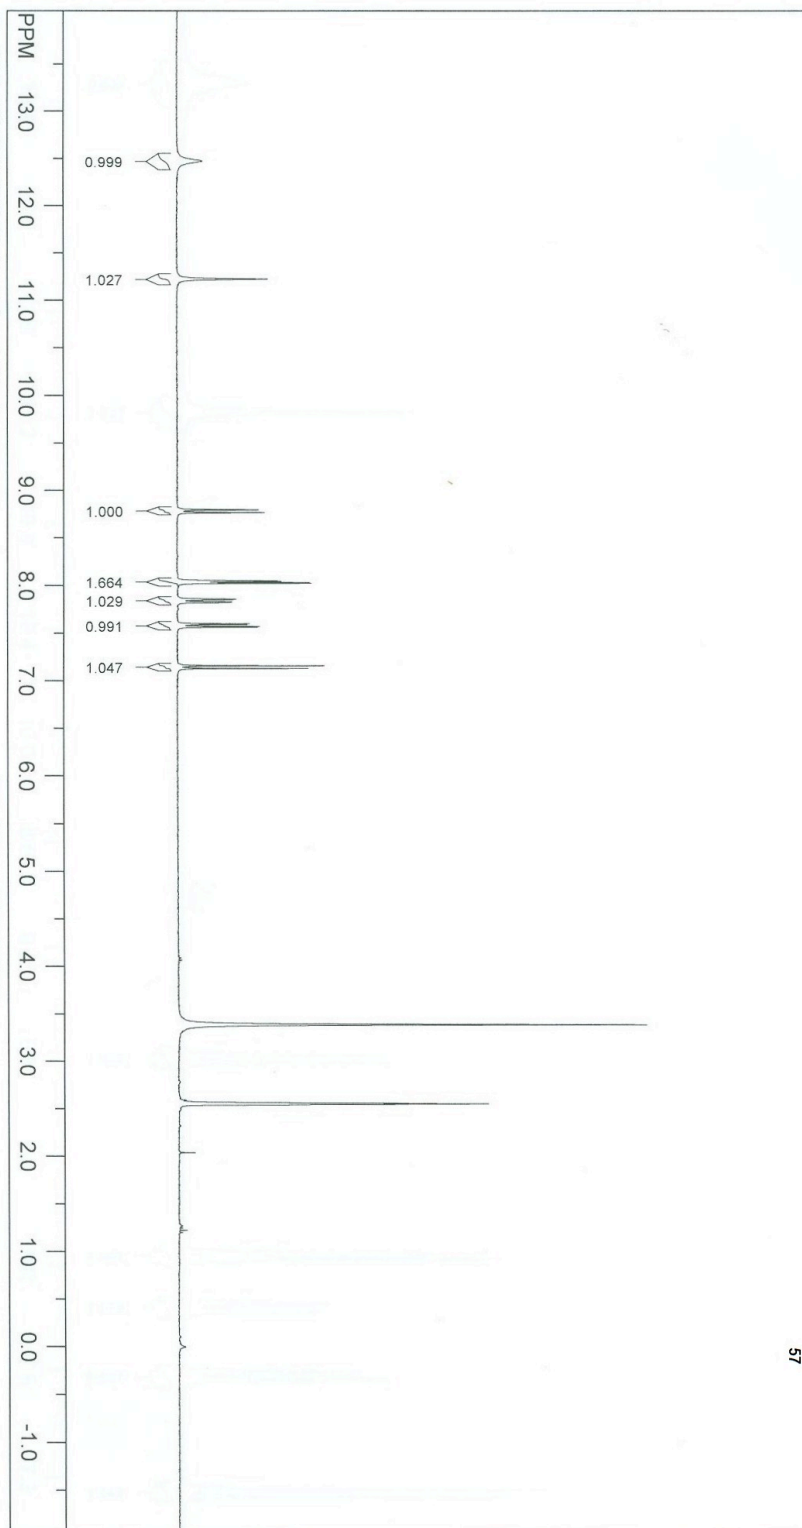

file: D:\남보리\NMR\N-331.fid\fid block# 1 exp1: "s2pu1"  
transmitter freq.: 299.970343 MHz  
time domain size: 19698 points  
width: 4807.69 Hz = 16.027225 ppm = 0.244070 Hz/pt  
number of scans: 8

freq. of 0 ppm: 299.968529 MHz  
processed size: 65536 complex points  
LB: 0.200 GB: 0.0000  
Hz/cm: 192.308 ppm/cm: 0.64109

SpinWorks 2.4: KRT1164

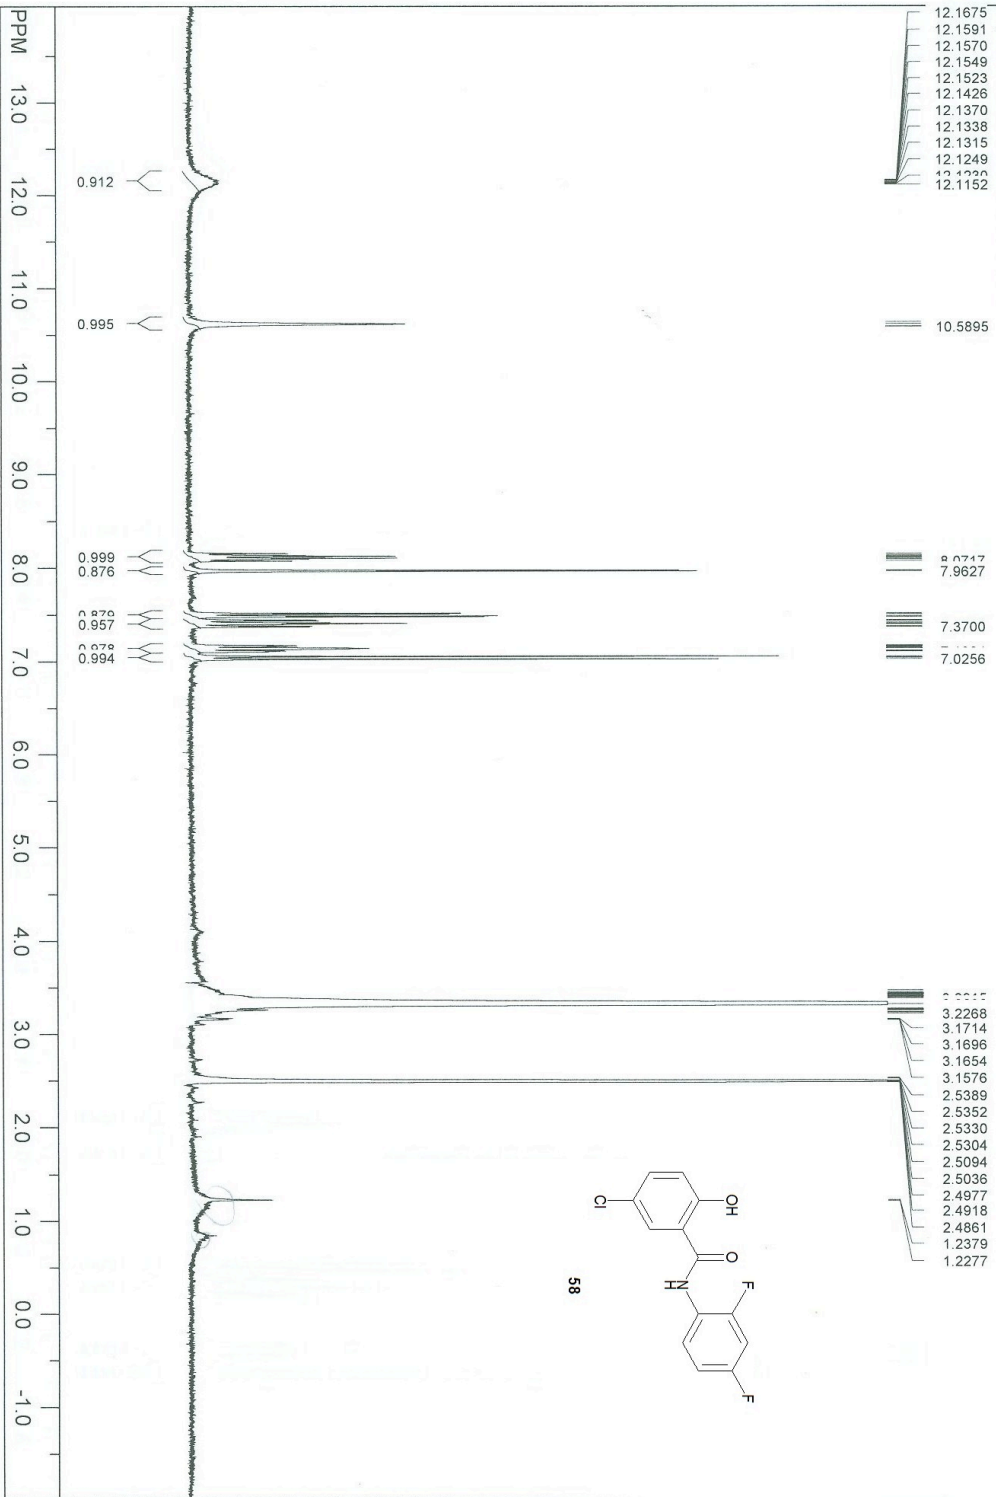

file: C:\M\KRT1164.fid block# 1 exp: "s2pu1"  
 transmitter freq.: 299.950076 MHz  
 time domain size: 19698 points  
 width: 4807.69 Hz = 16.028308 ppm = 0.244070 Hz/pt  
 number of scans: 8

freq. of 0 ppm: 299.948270 MHz  
 processed size: 65536 complex points  
 LB: 0.200 GB: 0.0000  
 Hz/cm: 192.308 ppm/cm: 0.64113

SpinWorks 2.4: KRT1195

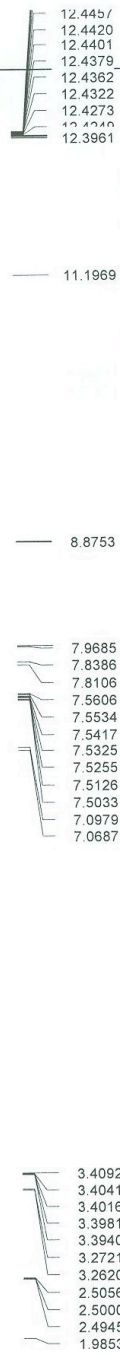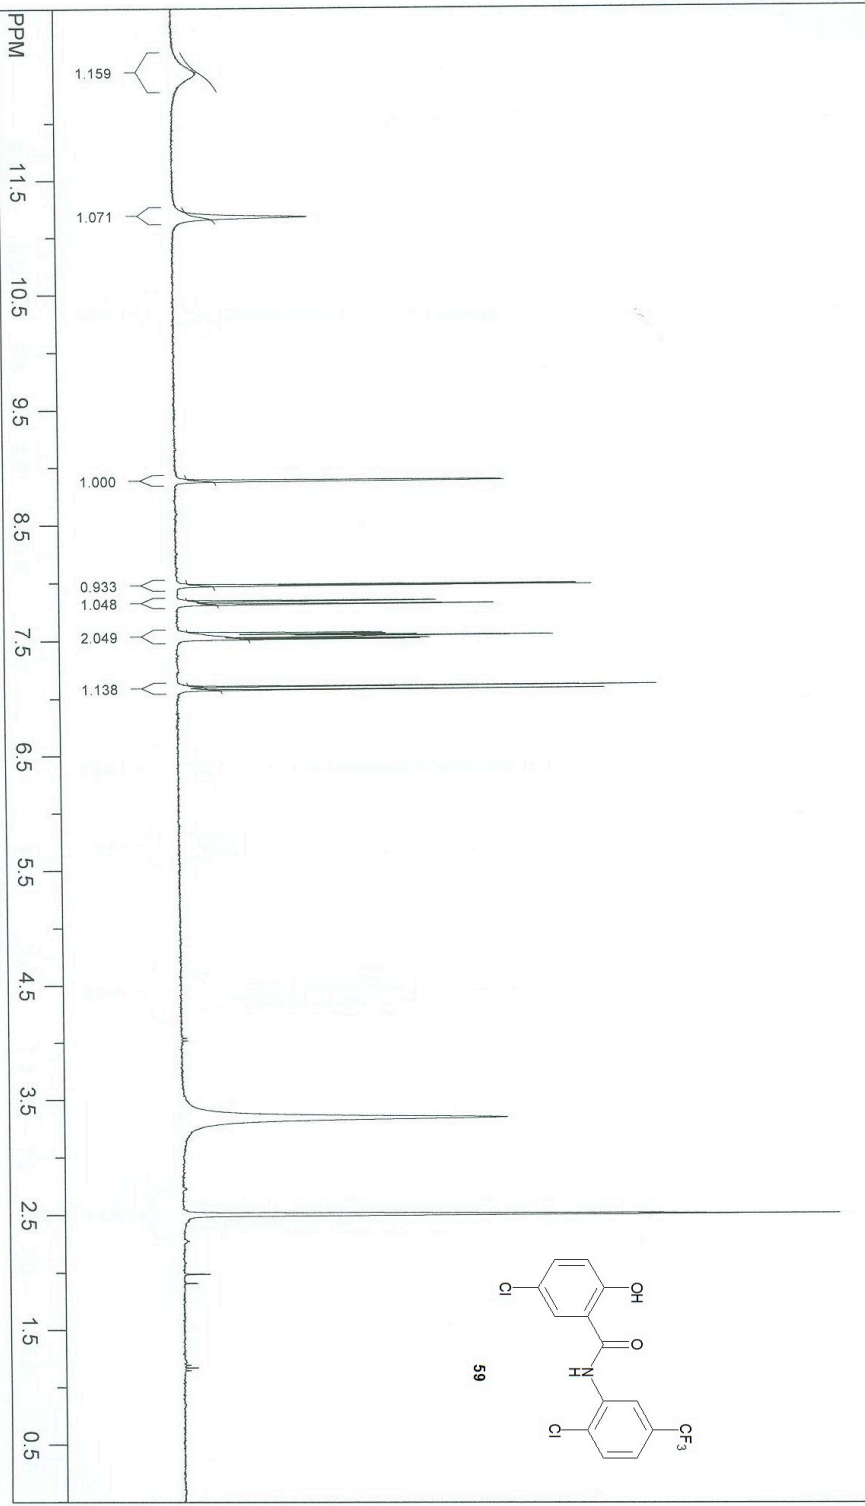

file: C:\bin\KRT1195.fid\fid block# 1 exp: "szpu"

transmitter freq.: 299.950076 MHz

time domain size: 19696 points

width: 4807.69 Hz = 16.028308 ppm = 0.244070 Hz/pt

number of scans: 8

freq. of 0 ppm: 299.948272 MHz

processed size: 65536 complex points

LB: 0.200 GB: 0.0000

HZ/cm: 155.925 ppm/cm: 0.51984

SpinWorks 2.4: KRT1192

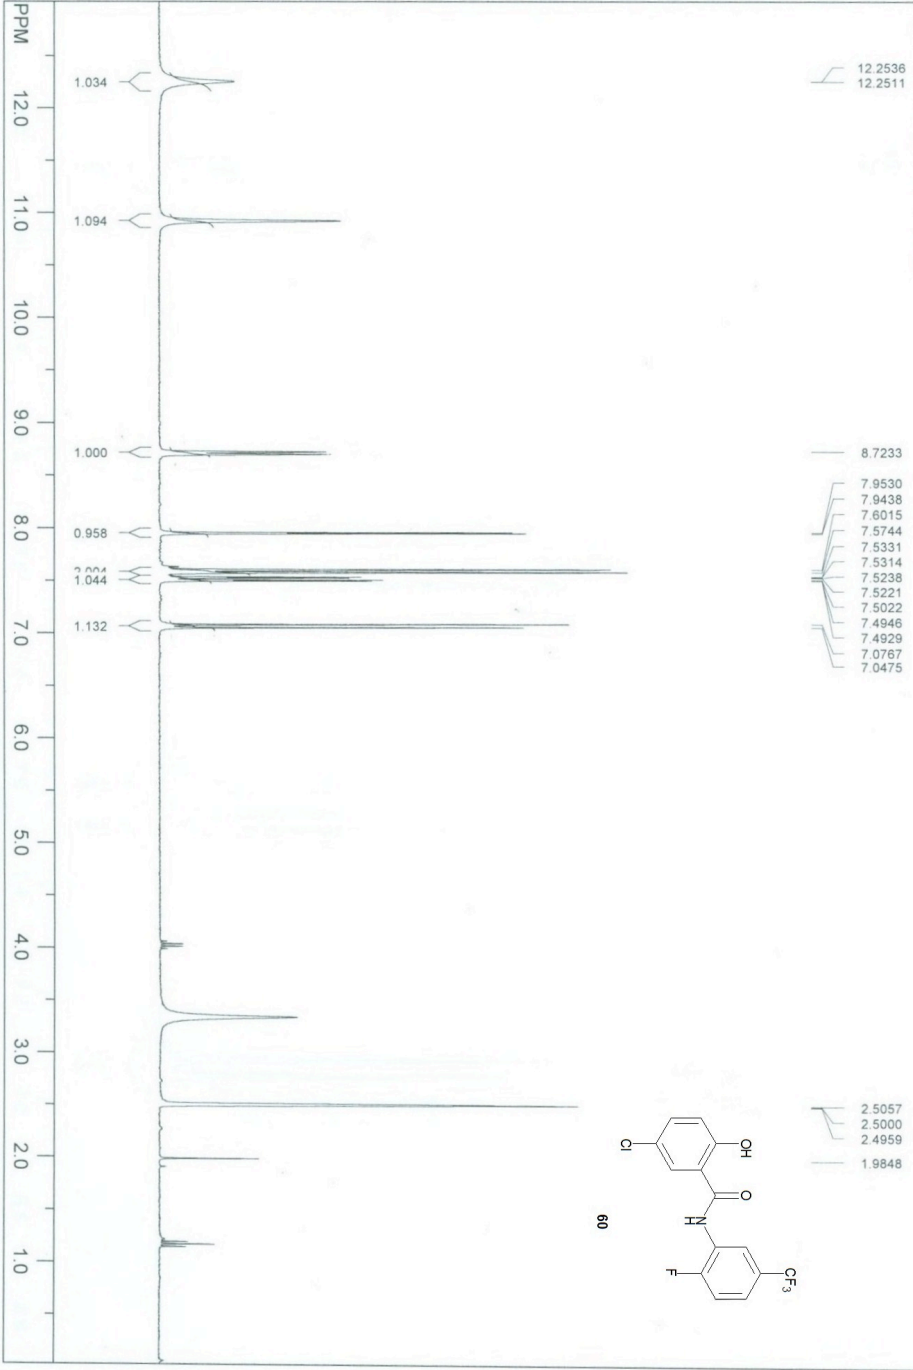

file: C:\PI\KRT1192\fid\fid\_block#1.expt: "sqpu"  
transmitter freq.: 299.950076 MHz  
time domain size: 19698 points  
width: 4807.69 Hz = 16.028308 ppm = 0.244070 Hz/pt  
number of scans: 8

freq. of 0 ppm: 299.948272 MHz  
processed size: 65536 complex points  
LB: 0.200 GB: 0.0000  
Hz/cm: 155.925 ppm/cm: 0.51984

SpinWorks 2.4: KRT1191

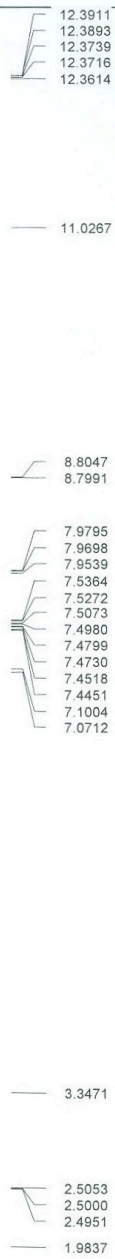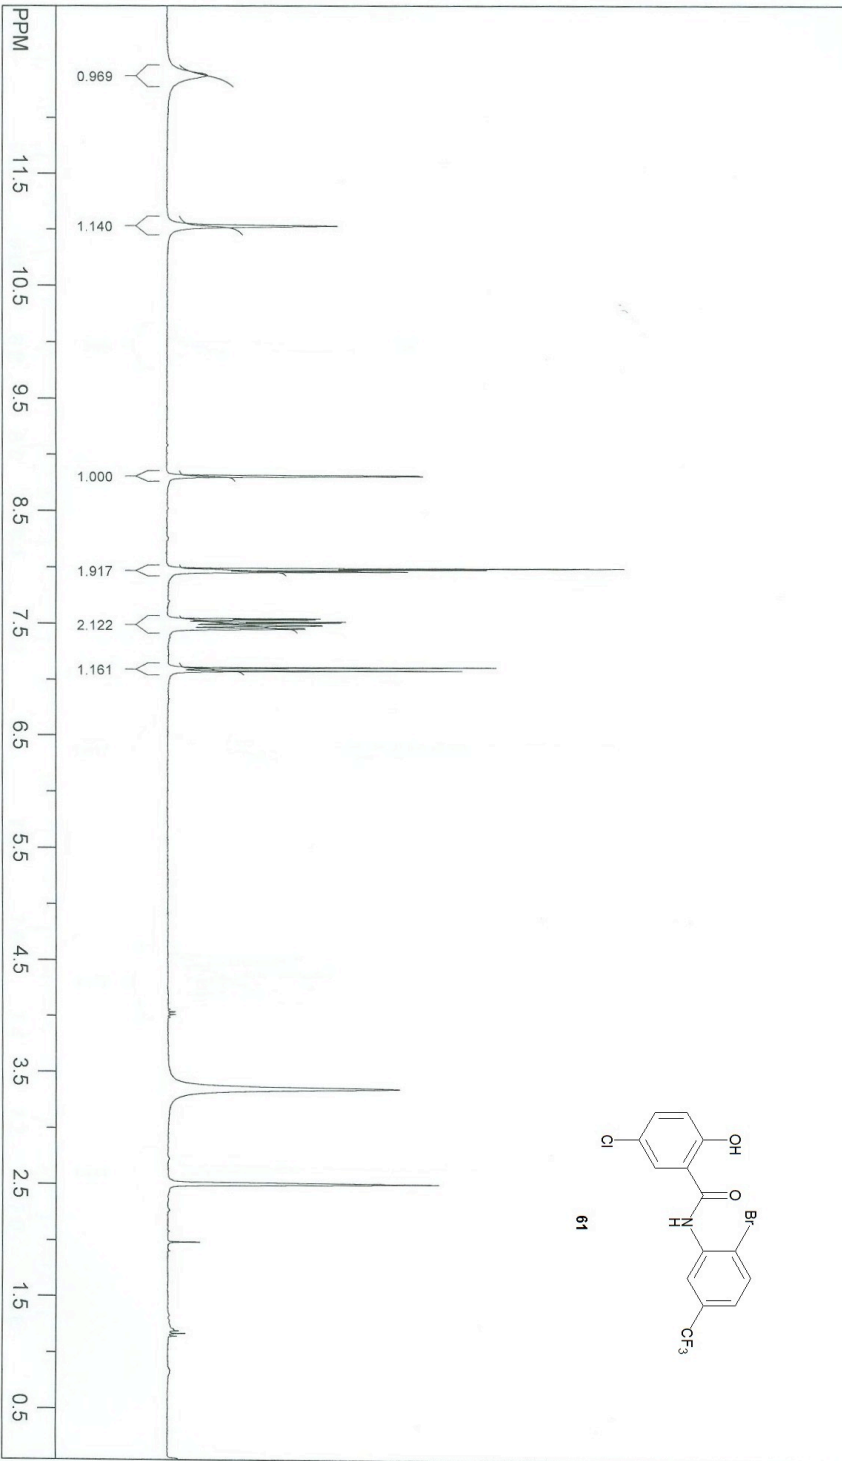

file: C:\E\KRT1191.fid\fid block# 1 exp: "s2pul"  
 transmitter freq.: 299.990076 MHz  
 time domain size: 19698 points  
 width: 4807.69 Hz = 16.028308 ppm = 0.244070 Hz/pt  
 number of scans: 8

freq. of 0 ppm: 299.948275 MHz  
 processed size: 65536 complex points  
 LB: 0.200 GB: 0.0000  
 Hz/cm: 155.422 ppm/cm: 0.51816

SpinWorks 2.4: KRT1814

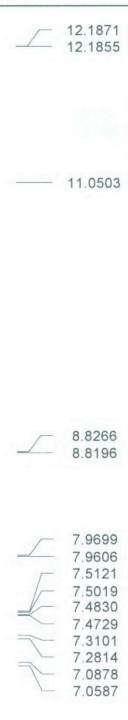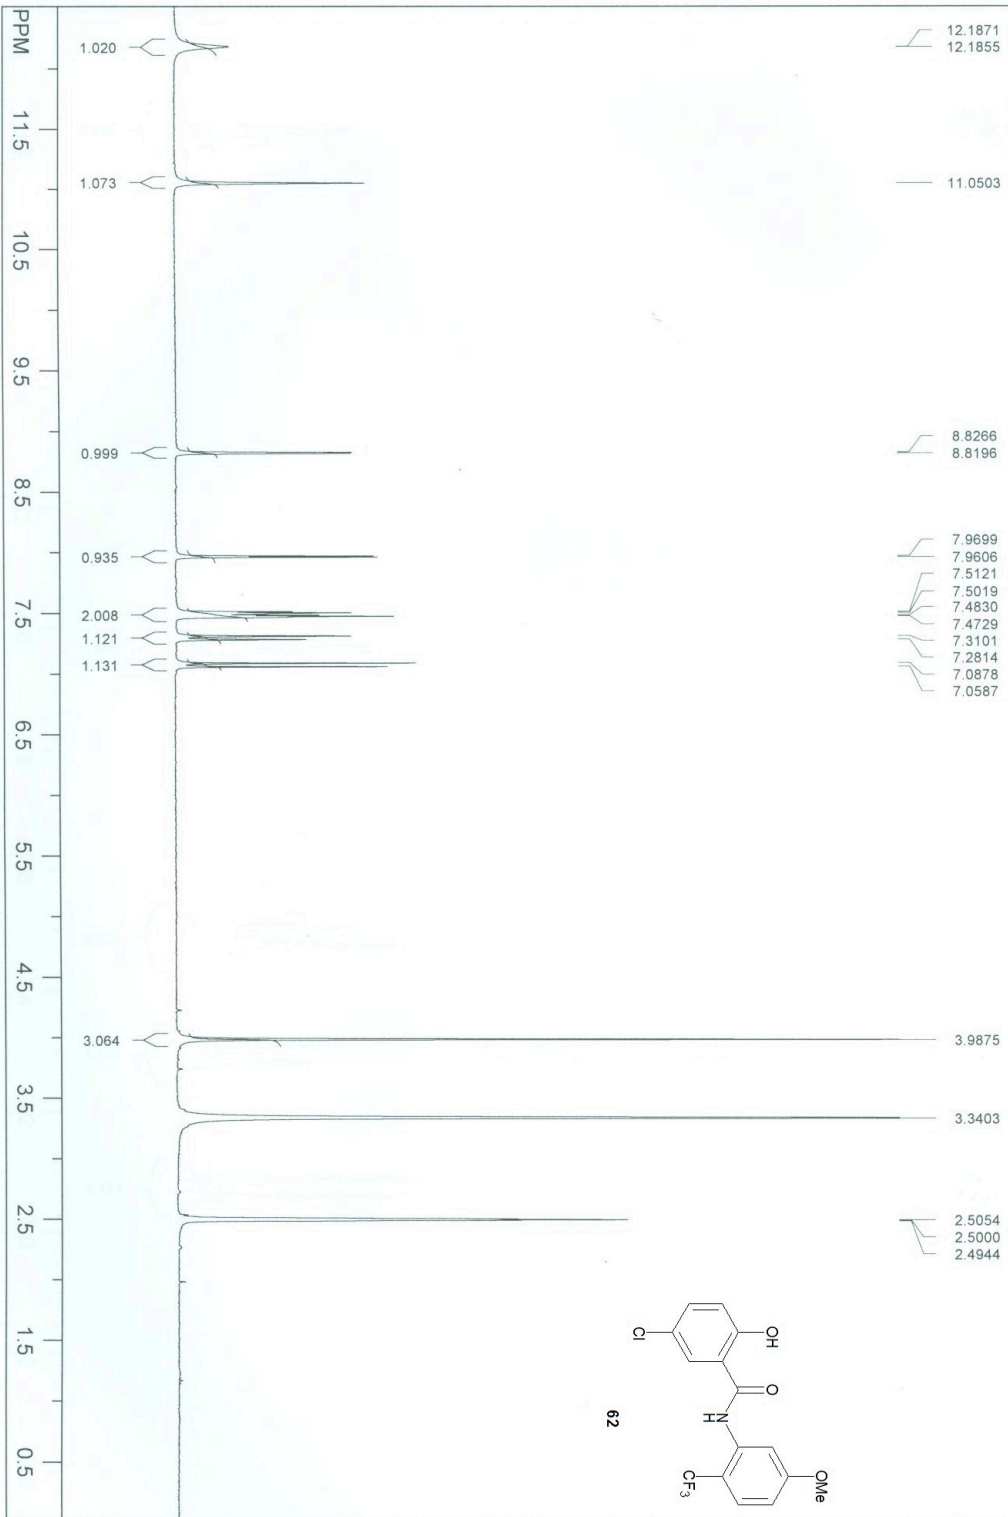

file: C:\mri\KRT1814\ftid\block#1 exp1: "s2pul"  
 transmitter freq.: 299.970343 MHz  
 time domain size: 19698 points  
 width: 4807.69 Hz = 16.027225 ppm = 0.244070 Hz/pt  
 number of scans: 8

freq. of 0 ppm: 299.968543 MHz  
 processed size: 65536 complex points  
 LB: 0.200 GB: 0.0000  
 Hz/cm: 149.889 ppm/cm: 0.49968

SpinWorks 2.4: N-327

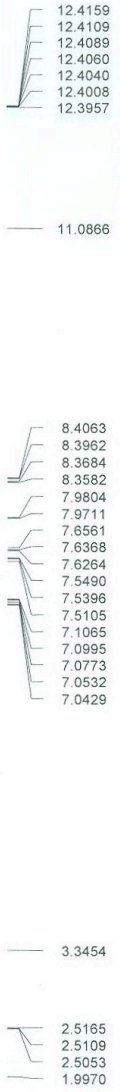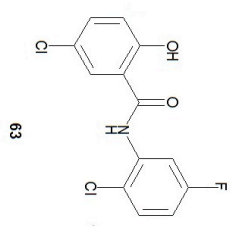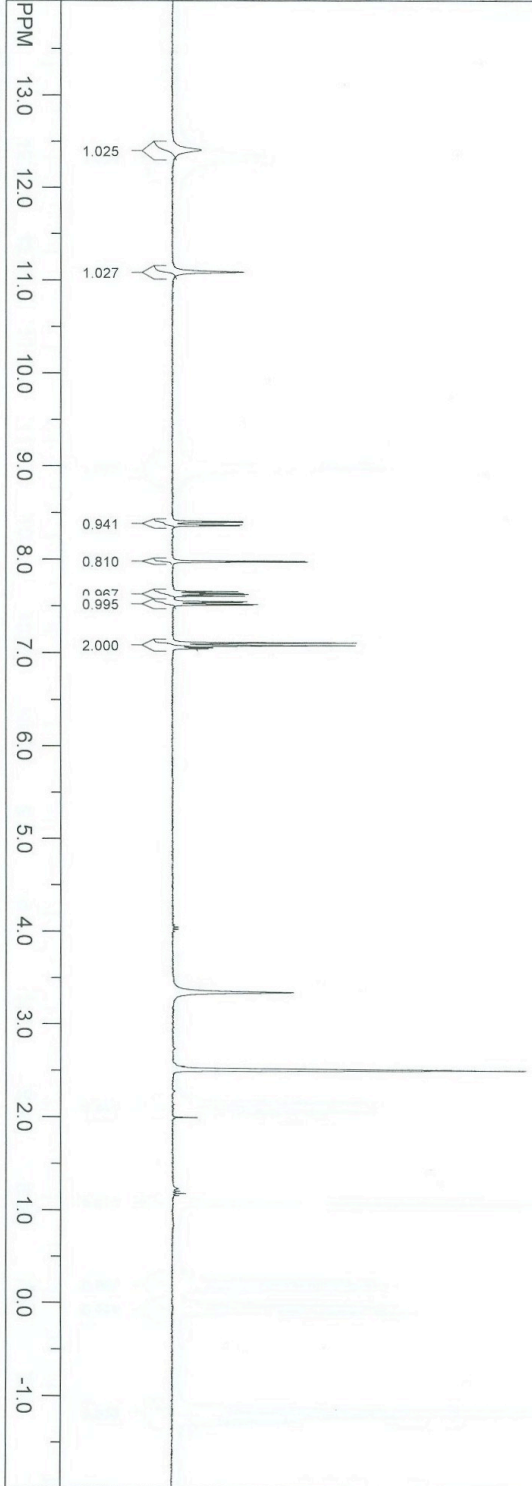

file: D:\남포리\N-327\fid\fid block# 1 exp1 "s2pu1"  
 transmitter freq.: 299.970343 MHz  
 time domain size: 19698 points  
 width: 4807.69 Hz = 16.027225 ppm = 0.244070 Hz/pt  
 number of scans: 8

freq. of 0 ppm: 299.968541 MHz  
 processed size: 65536 complex points  
 LB: 0.200 GB: 0.0000  
 Hz/cm: 192.308 ppm/cm: 0.64109



SpinWorks 2.4: N-304

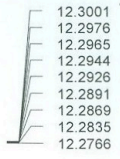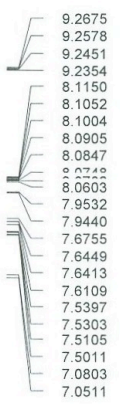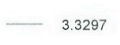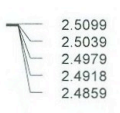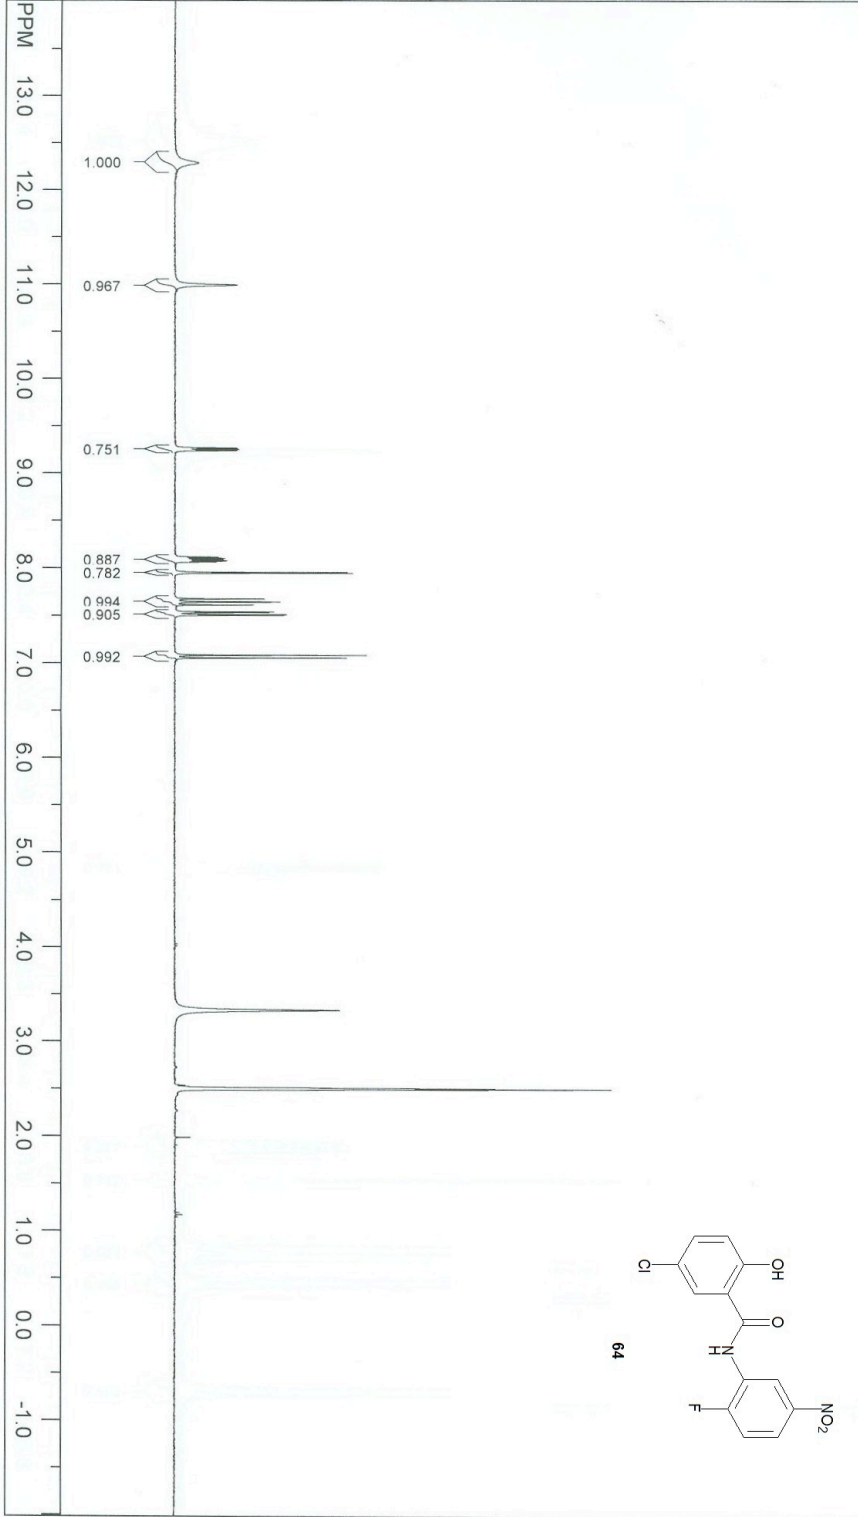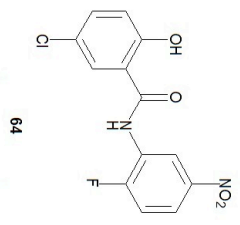

file: D:\남보리\N-304.fid\fid block# 1 expt: "szpu1"  
 transmitter freq.: 299.970343 MHz  
 time domain size: 19698 points  
 width: 4807.69 Hz = 16.027225 ppm = 0.244070 Hz/pt  
 number of scans: 8

freq. of 0 ppm: 299.968544 MHz  
 processed size: 65536 complex points  
 LB: 0.200 GB: 0.0000  
 Hz/cm: 192.308 ppm/cm: 0.64109

KR11196-0814

File: Proton

Pulse Sequence: s2pul1

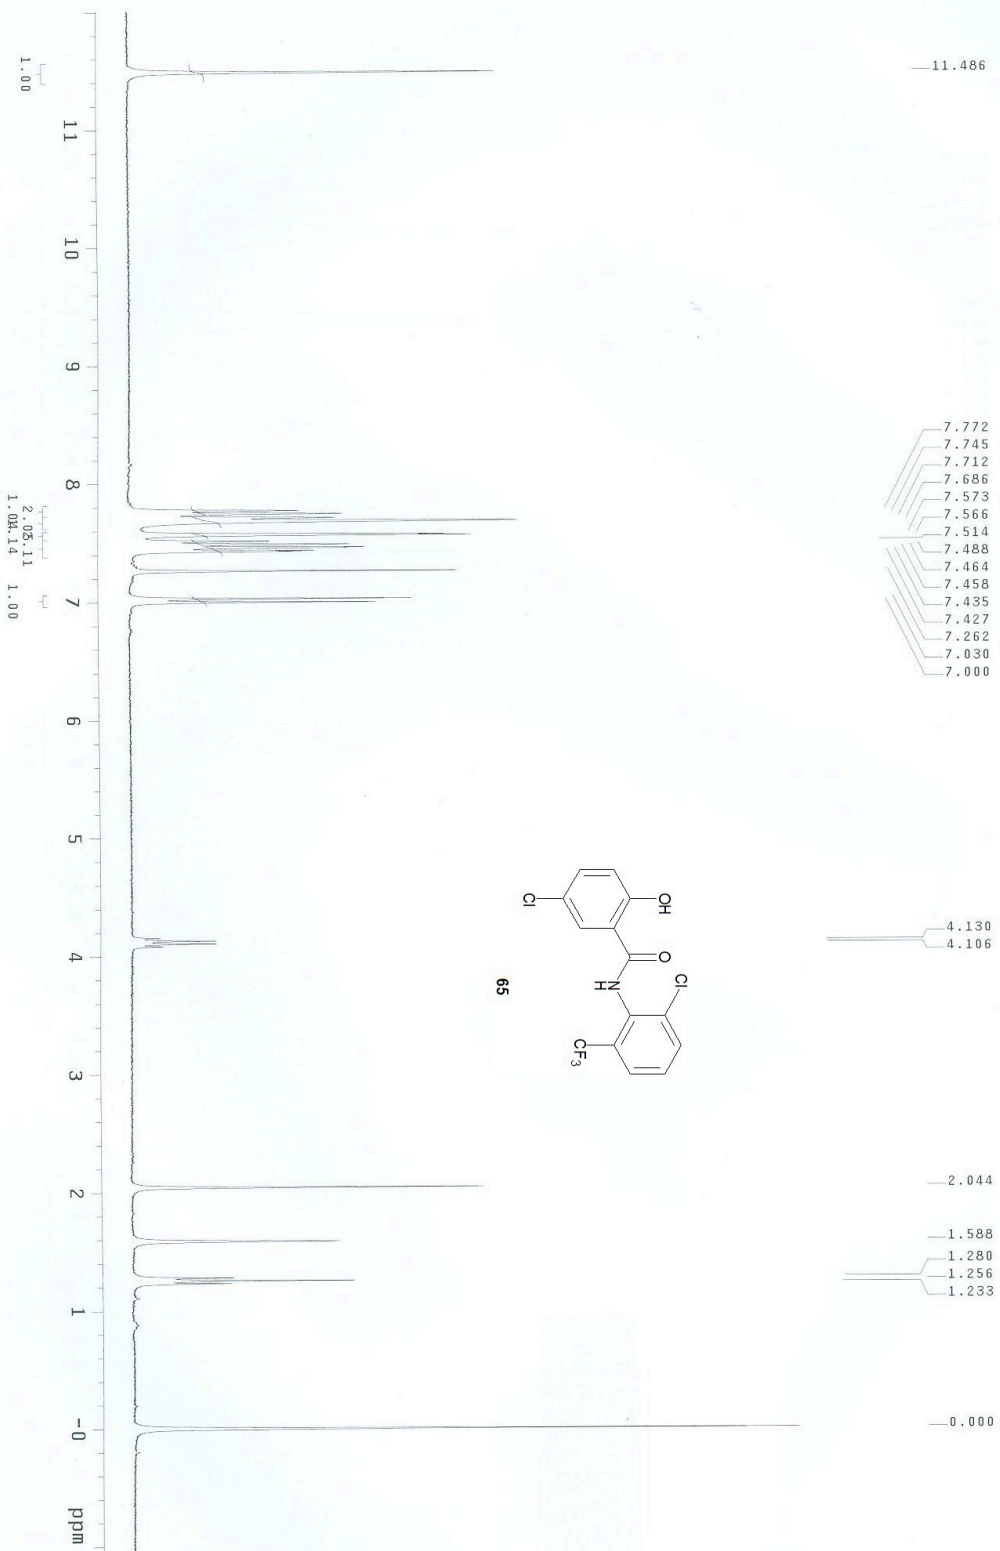

SpinWorks 2.4: KRT1163

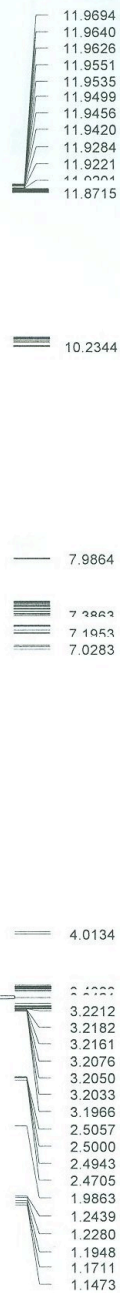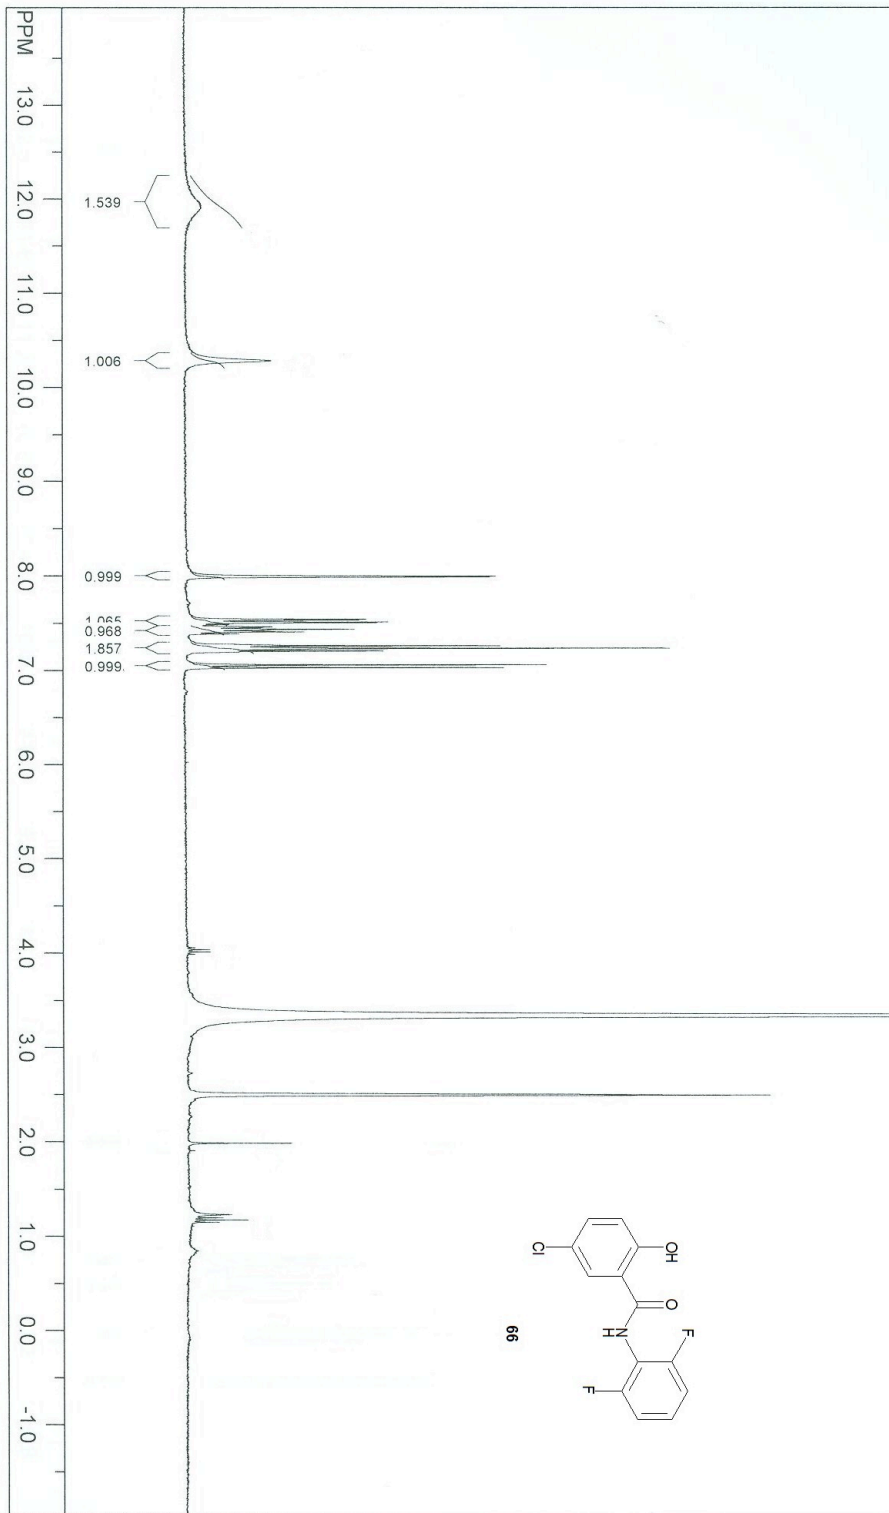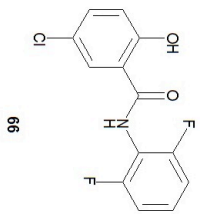

file: C:\msdchem\KRT1163\fid\fid\_block# 1 exp: "s2pu"  
 transmitter freq.: 299.950076 MHz  
 time domain size: 19698 points  
 width: 4807.69 Hz = 16.028308 ppm = 0.244070 Hz/pt  
 number of scans: 8

freq. of 0 ppm: 299.948269 MHz  
 processed size: 65536 complex points  
 LB: 0.200 GB: 0.0000  
 Hz/cm: 192.308 ppm/cm: 0.64113

SpinWorks 2.4: KRT1048

11.5925  
11.5871  
11.5848  
11.5830  
11.5810  
11.5780  
11.5761  
11.5738  
11.5716  
11.5702  
11.5683  
11.5663  
11.5502

10.6265

8.1943  
8.0237  
8.0121  
7.9838  
7.8878  
7.8794  
7.5685  
7.5357  
7.5161  
7.5024  
7.4939  
7.4852  
7.4642  
7.4559  
7.0373  
7.0079

3.4256  
3.4216  
3.3487

2.5014

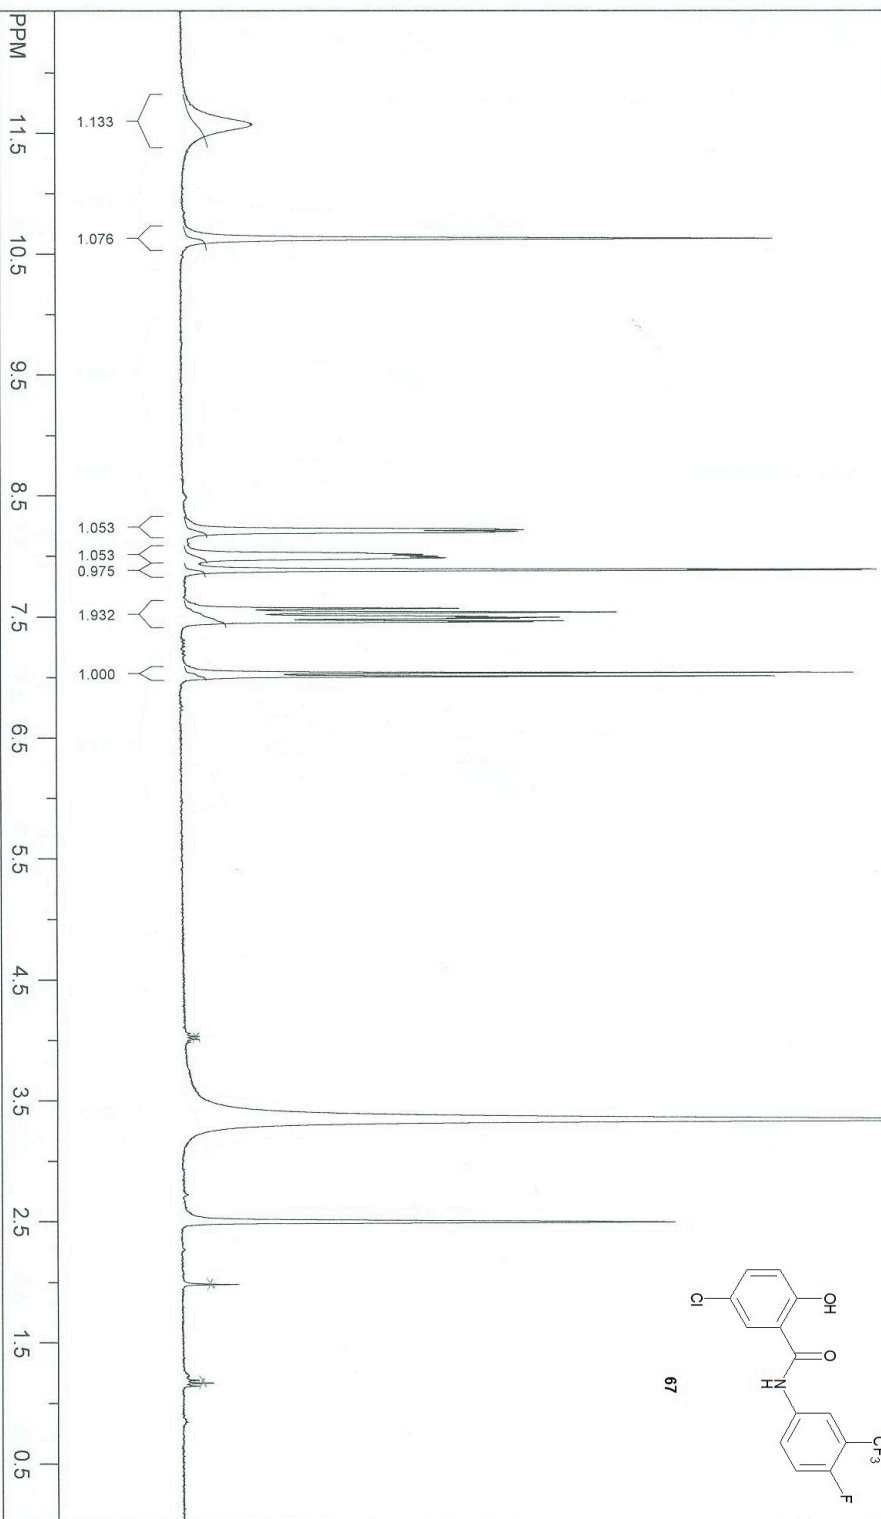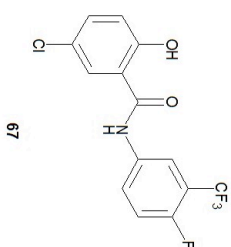

file: C:\min\KRT1048.fid\fid block# 1 exp: "szpu"  
transmitter freq.: 299.950076 MHz  
time domain size: 19698 points  
width: 4807.69 Hz = 16.028308 ppm = 0.244070 Hz/pt  
number of scans: 8  
freq. of 0 ppm: 299.948282 MHz  
processed size: 65536 complex points  
LB: 0.200 GB: 0.0000  
Hz/cm: 150.225 ppm/cm: 0.50083

File: Proton  
Pulse Sequence: s2pu1

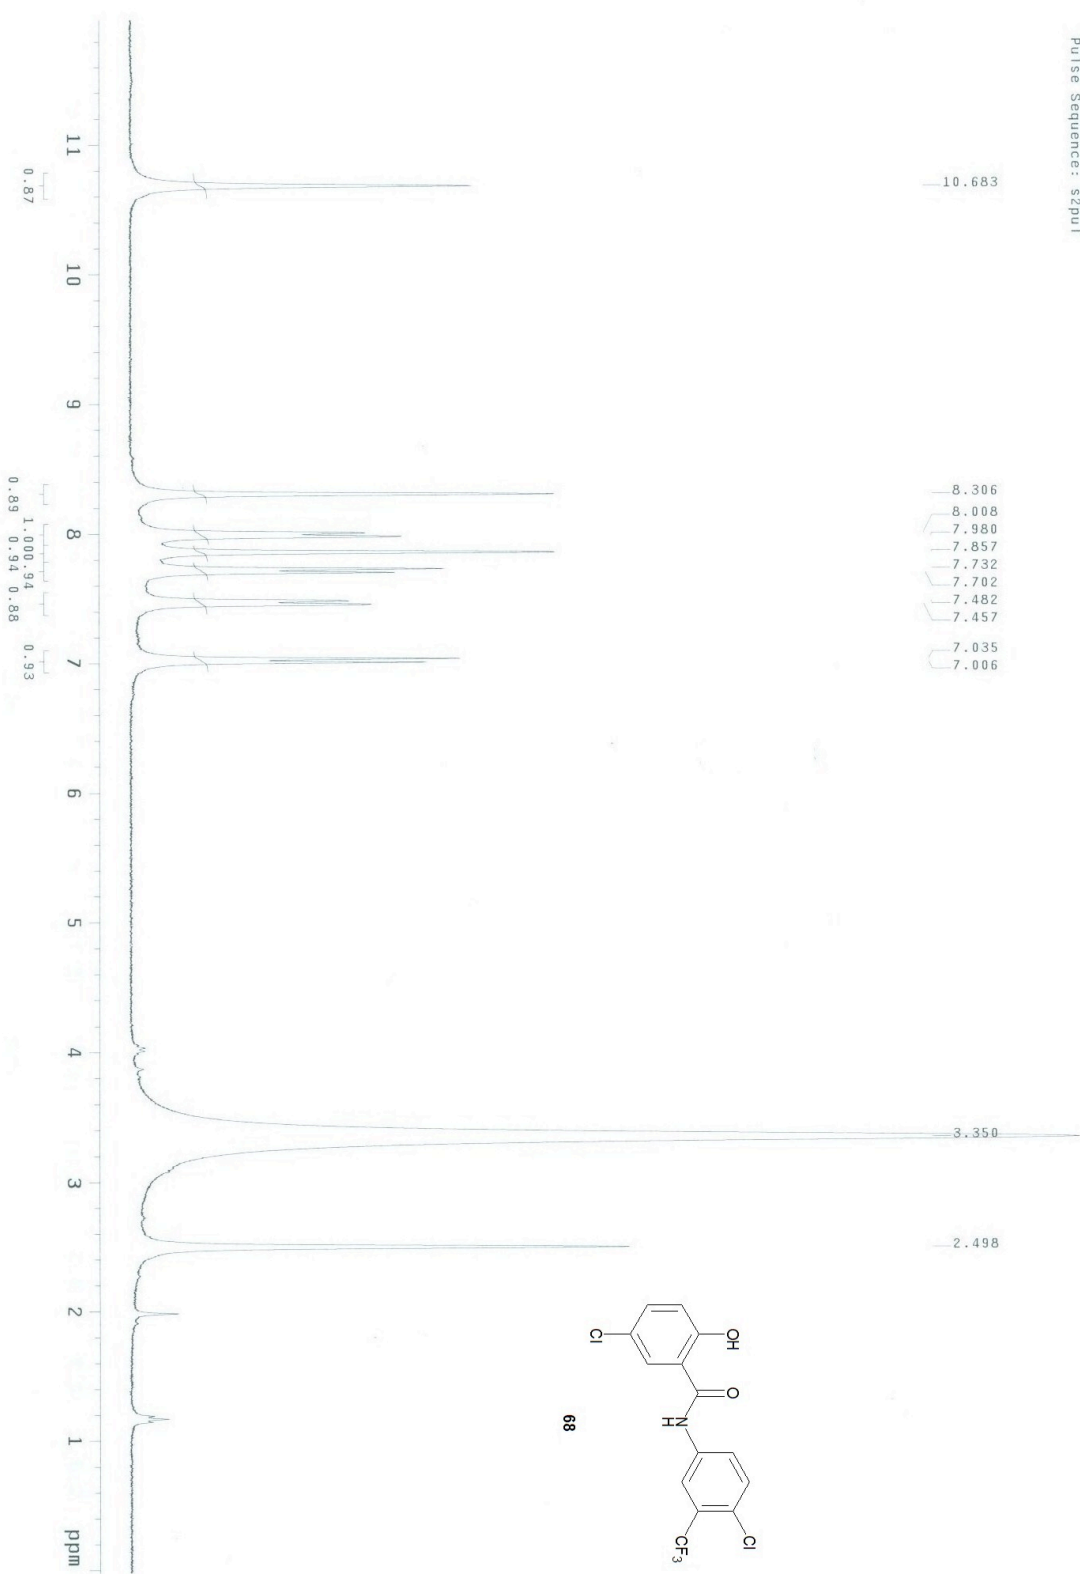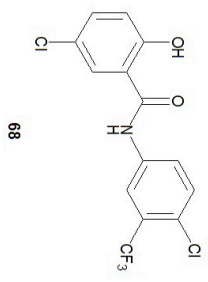

SpinWorks 2.4: KRT1185

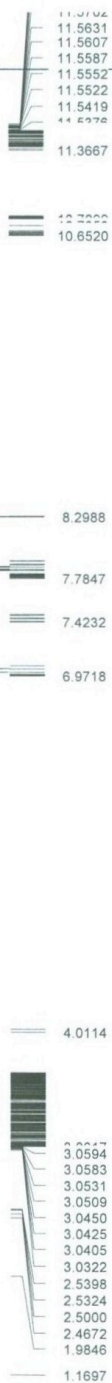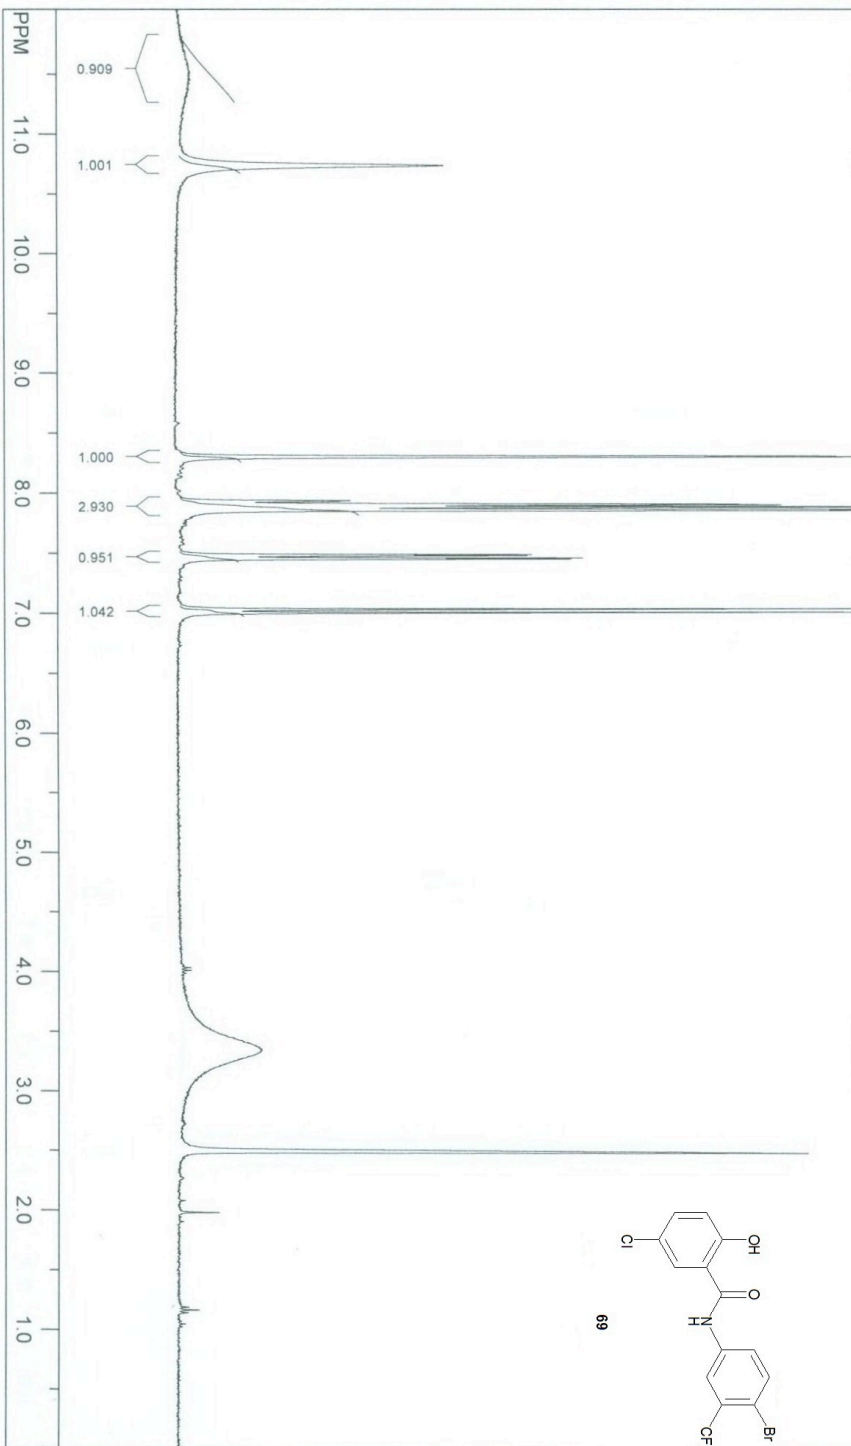

file: C:\1\1\KRT1185.fid\fid block# 1 expt "s2pul"  
 transmitter freq.: 299.950076 MHz  
 time domain size: 19698 points  
 width: 4807.69 Hz = 16.028308 ppm = 0.244070 Hz/pt  
 number of scans: 8

freq. of 0 ppm: 299.948276 MHz  
 processed size: 65536 complex points  
 LB: 0.200 GB, 0.0000  
 Hz/cm: 144.692 ppm/cm: 0.48239

SpinWorks 2.4: KRT1189

11.3558  
11.3522  
11.3504  
11.3485  
11.3465  
11.3440  
11.3402  
11.3380  
11.3363  
11.3343  
11.3285  
11.3267  
11.3245  
10.9858  
10.9603

8.4244  
8.1913  
8.1854  
8.1603  
7.7973  
7.7887  
7.5013  
7.4927  
7.4831  
7.4719  
7.4634  
7.0510  
7.0372  
7.0217

3.4135  
3.4118  
3.4104  
3.4084  
3.3405  
3.2959  
3.2852  
3.2817  
2.5000

1.0867

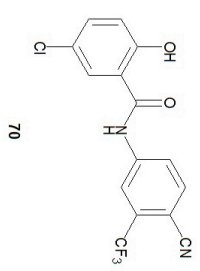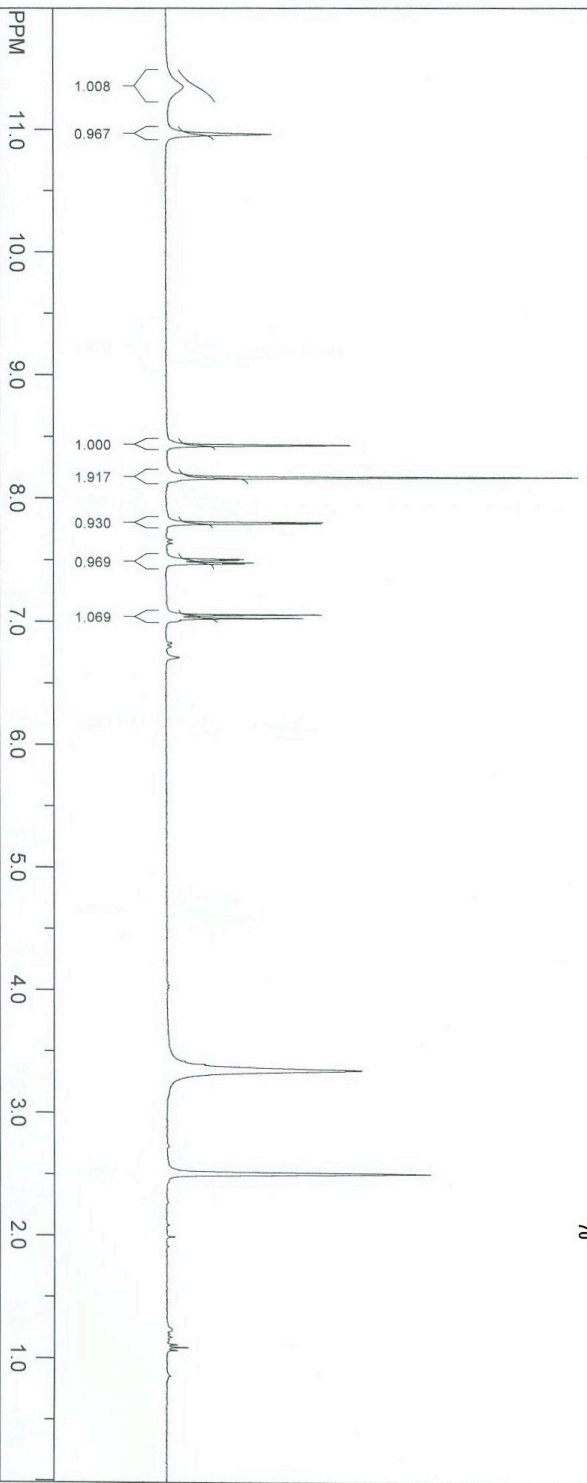

file: C:\min\KRT1189.fid\fid block# 1 exp1 "g2pu1"  
transmitter freq.: 299.950076 MHz  
time domain size: 19698 points  
width: 4807.69 Hz = 16.028308 ppm = 0.244070 Hz/pt  
number of scans: 8

freq. of 0 ppm: 299.948276 MHz  
processed size: 65536 complex points  
LB: 0.200 GB: 0.0000  
HZ/cm: 144.021 ppm/cm: 0.48015

SpinWorks 2.4: N-302

- 11.6088
- 10.5081
- 8.0407
- 8.0322
- 8.0178
- 8.0095
- 7.8792
- 7.8704
- 7.6714
- 7.6624
- 7.6571
- 7.6481
- 7.6412
- 7.6321
- 7.6272
- 7.6184
- 7.4885
- 7.4797
- 7.4636
- 7.4596
- 7.4504
- 7.4338
- 7.4034
- 7.0318
- 7.0024
- 3.3276
- 2.5037
- 2.4980
- 2.4925

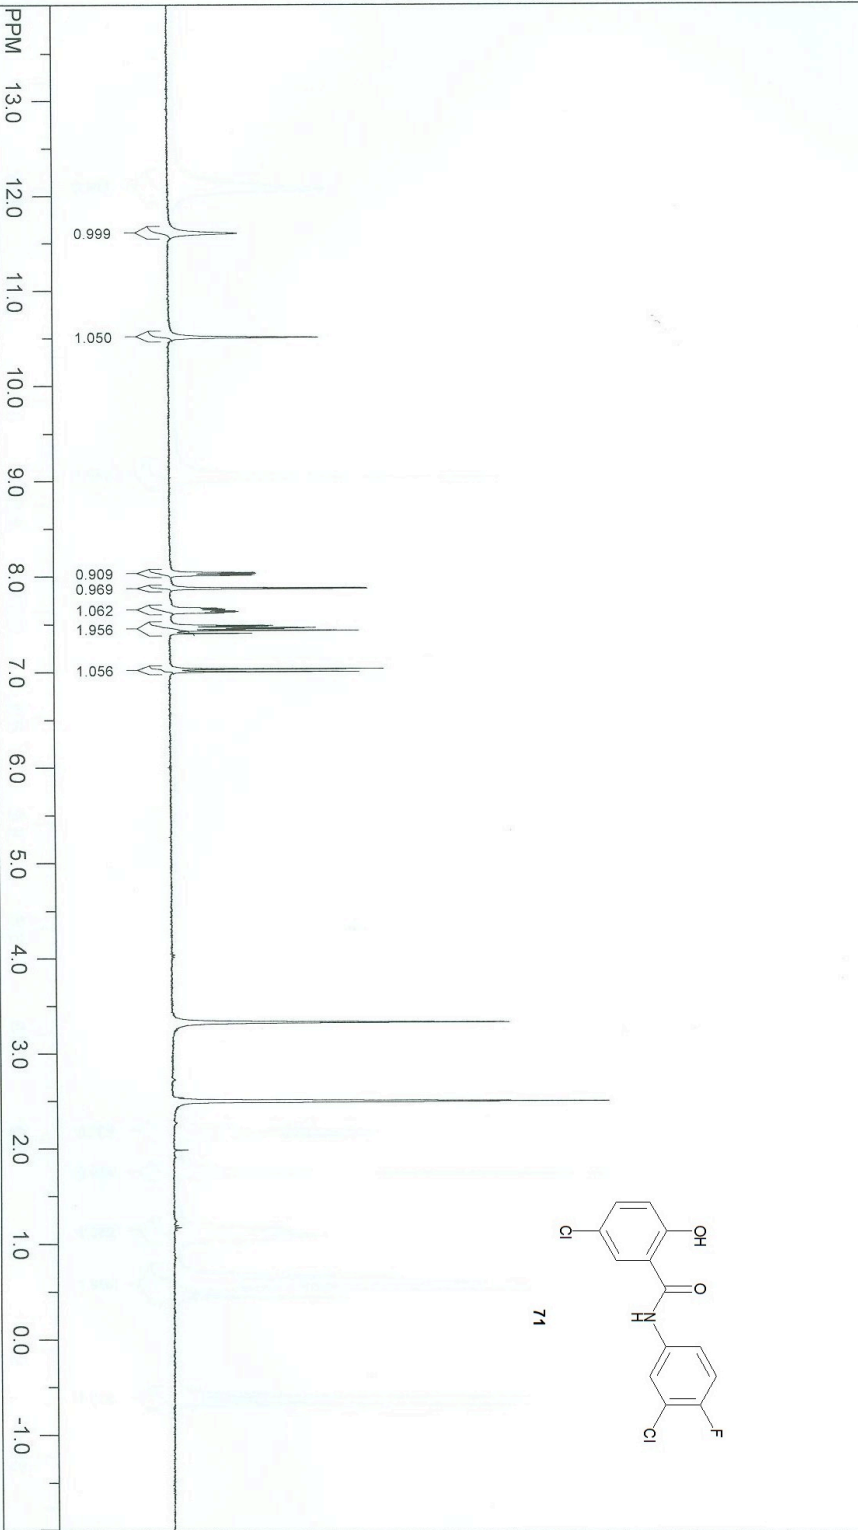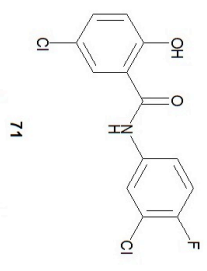

file: D:\남보리\N-302.fid\fid\_block#1 exp1: "s2pu1"  
transmitter freq.: 299.970343 MHz  
time domain size: 19698 points  
width: 4807.69 Hz = 16.027225 ppm = 0.244070 Hz/pt  
number of scans: 8  
freq. of 0 ppm: 299.968544 MHz  
processed size: 65536 complex points  
LB: 0.200 GB: 0.0000  
Hz/cm: 192.308 ppm/cm: 0.64109



SpinWorks 2.4: N-303

11.6168  
11.6146  
11.6127  
11.6110  
11.6089  
11.6071  
11.6039  
11.6017  
11.5998  
11.5971  
11.5955  
11.5875

10.5305

7.8487  
7.4450  
7.4210  
7.3907  
7.0262  
6.9969

3.3639  
3.3615  
3.3594  
3.3573  
3.3539  
3.3243  
3.3232  
3.2906  
3.2887  
2.5000  
2.4943  
2.4888  
1.9807  
1.1660

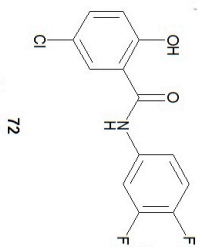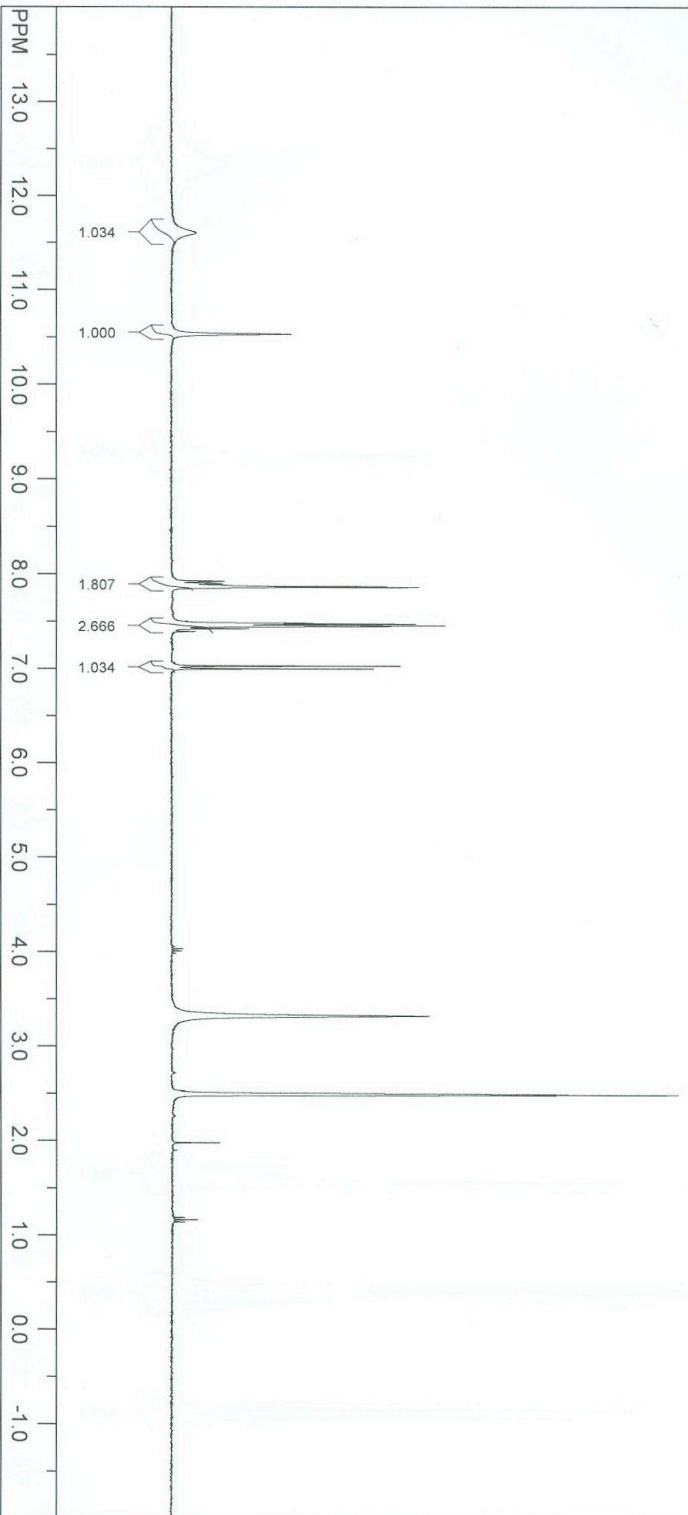

file: D:\남보리\N-303.fid\fid block# 1 expt: "s2pul"  
transmitter freq.: 299.970343 MHz  
time domain size: 19698 points  
width: 4807.69 Hz = 16.027225 ppm = 0.244070 Hz/pt  
number of scans: 8

freq. of 0 ppm: 299.968545 MHz  
processed size: 65536 complex points  
LB: 0.200 GB: 0.0000  
HZ/cm: 192.308 ppm/cm: 0.64109

SpinWorks 2.4: N-323

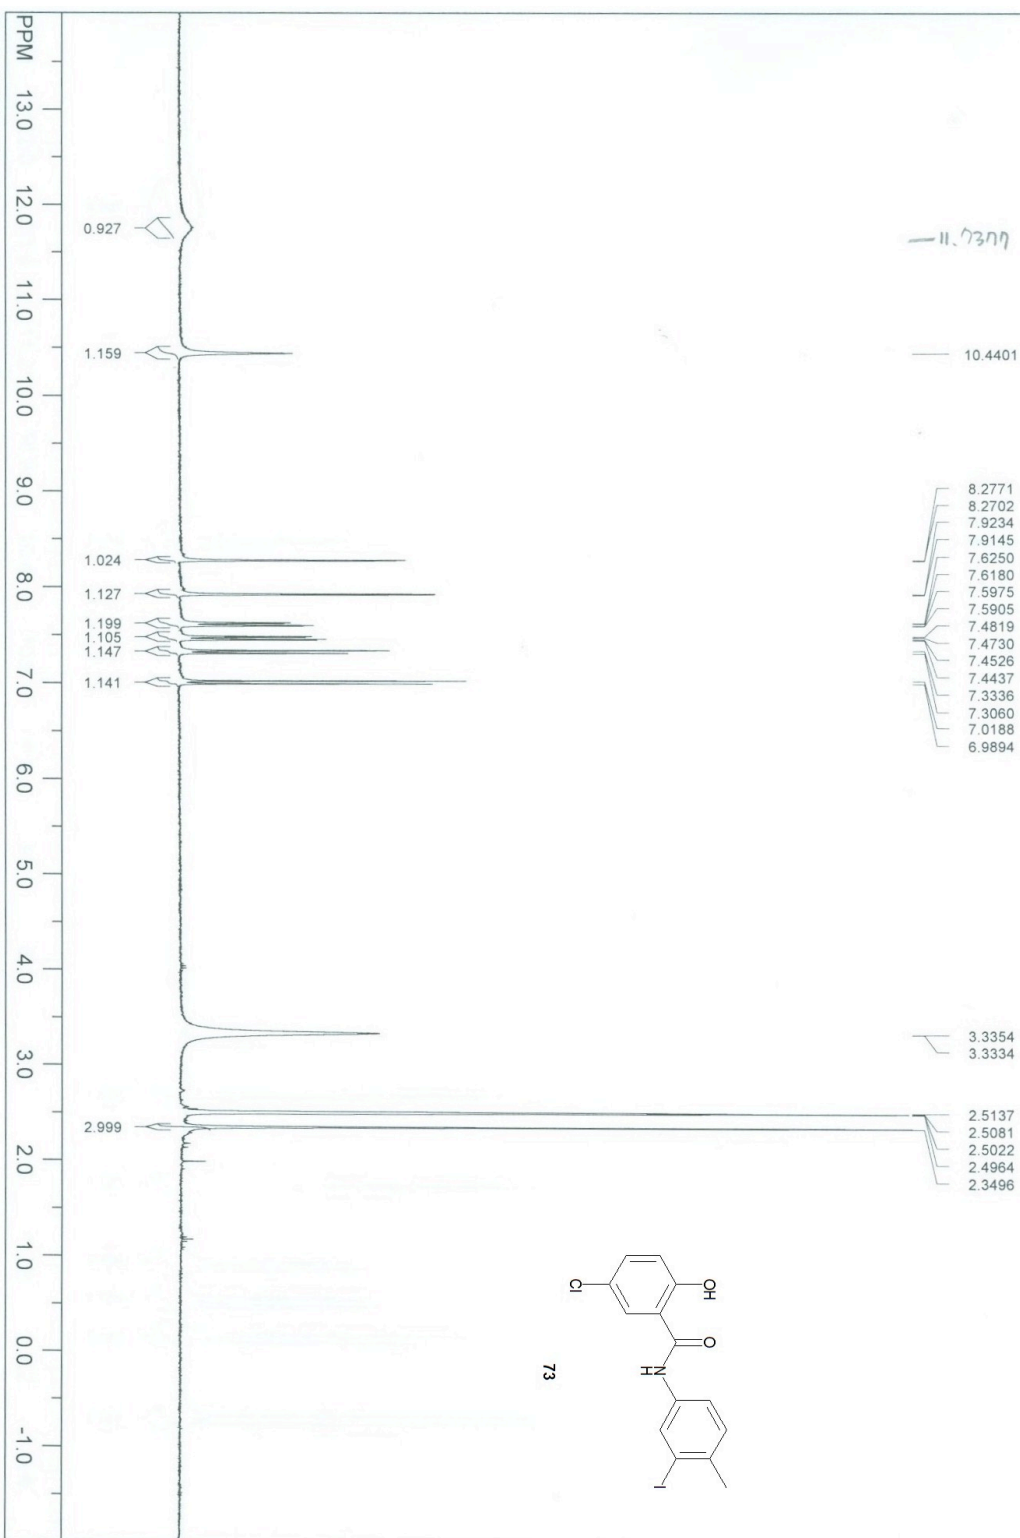

file: D:\남보리\N-323\fid\fid block# 1 exp1 "s2pul"  
 transmitter freq.: 299.970343 MHz  
 time domain size: 19698 points  
 width: 4807.69 Hz = 16.027225 ppm = 0.244070 Hz/pt  
 number of scans: 8

freq. of 0 ppm: 299.968543 MHz  
 processed size: 65536 complex points  
 LB: 0.200 GB: 0.0000  
 Hz/cm: 192.308 ppm/cm: 0.64109

SpinWorks 2.4: KRT1194

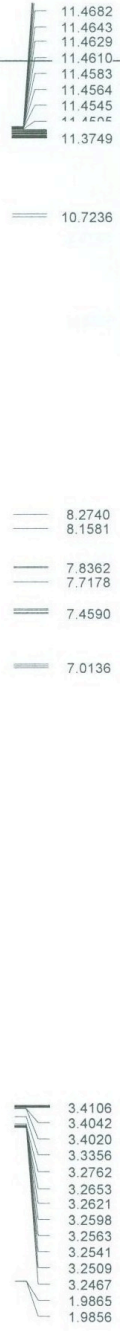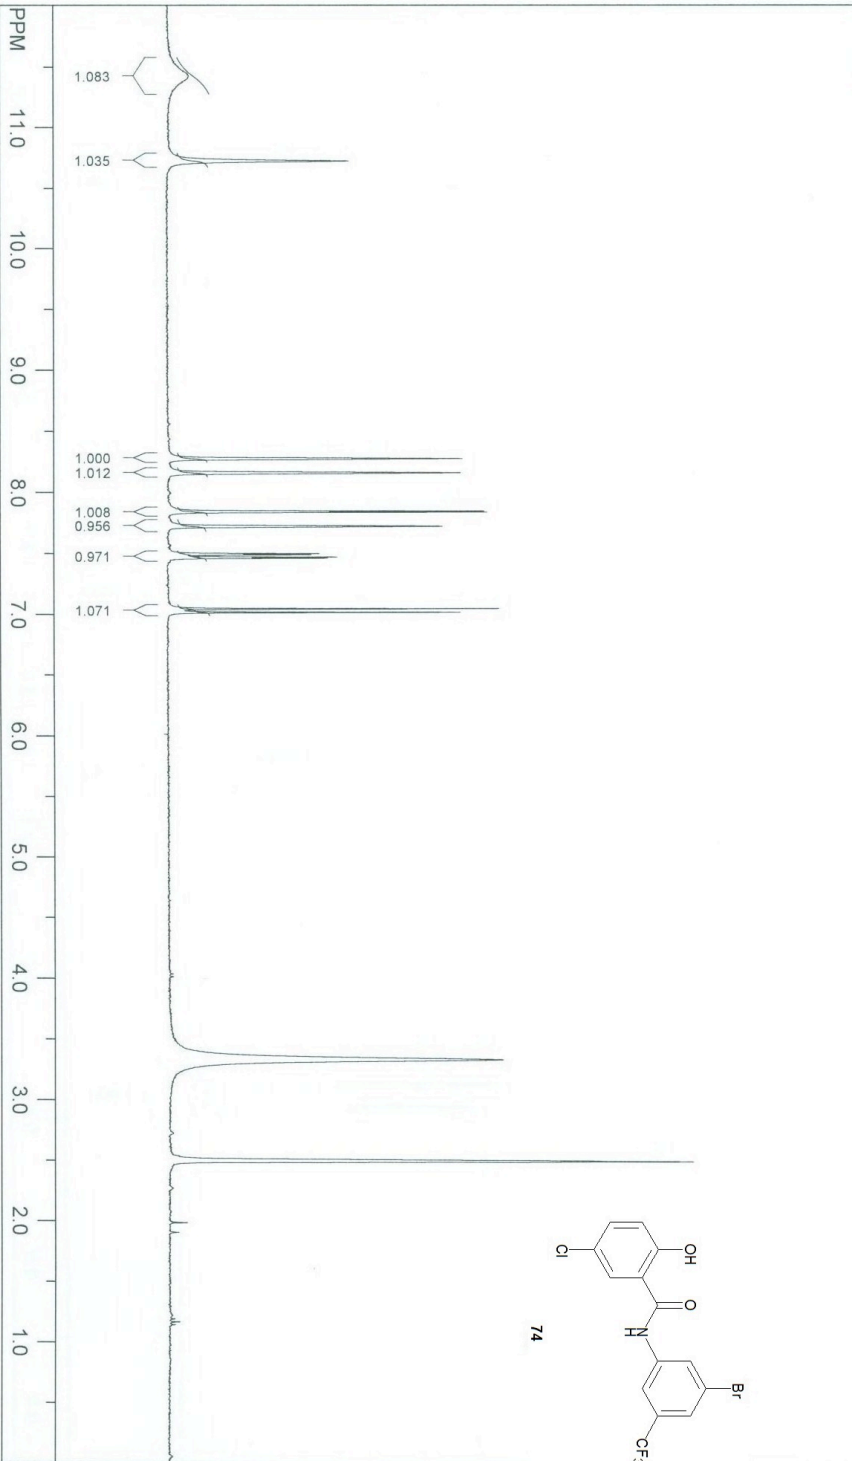

file: C:\bin\KRT1194.fid block# 1 exp# "s2pul"

transmitter freq.: 299.950076 MHz

time domain size: 19698 points

width: 4807.69 Hz = 16.028308 ppm = 0.244070 Hz/pt

number of scans: 8

freq. of 0 ppm: 299.948272 MHz

processed size: 65536 complex points

LB: 0.200 GB: 0.0000

HZ/cm: 144.189 ppm/cm: 0.48071

SpinWorks 2.4: dimethoxy

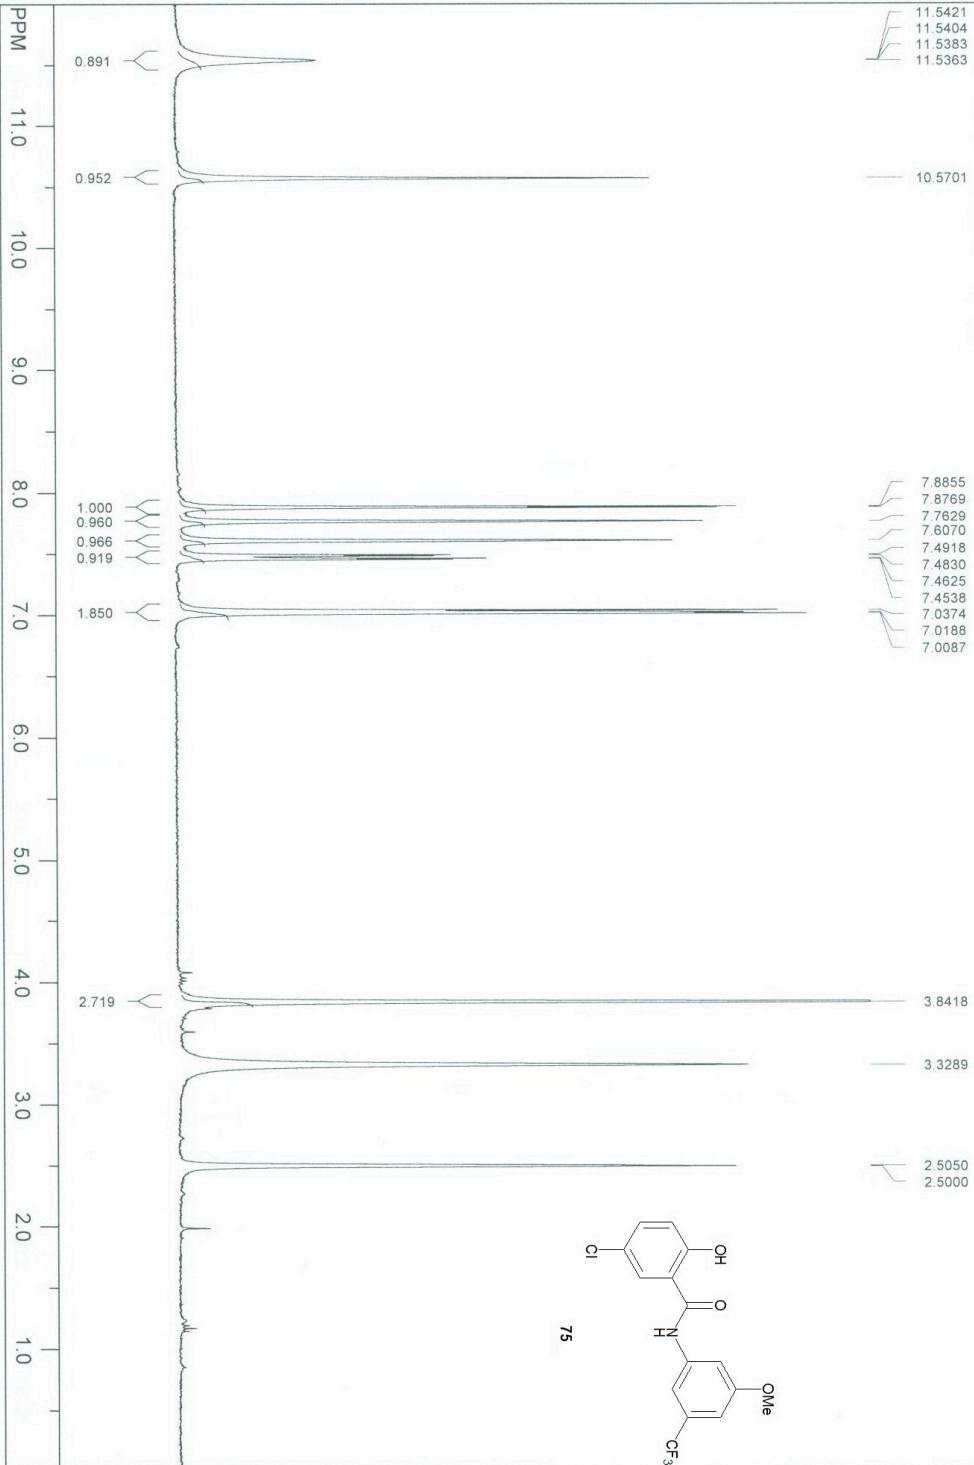

file: C:\M\dimethoxy.fid\fid block# 1 exp: "s2pu"  
 transmitter freq.: 299.950076 MHz  
 time domain size: 13698 points  
 width: 4807.69 Hz = 16.028308 ppm = 0.244070 Hz/pt  
 number of scans: 8

freq. of 0 ppm: 299.948281 MHz  
 processed size: 65536 complex points  
 LB: 0.200 GB: 0.0000  
 Hz/cm: 143.686 ppm/cm: 0.47903



SpinWorks 2.4: KRT1042

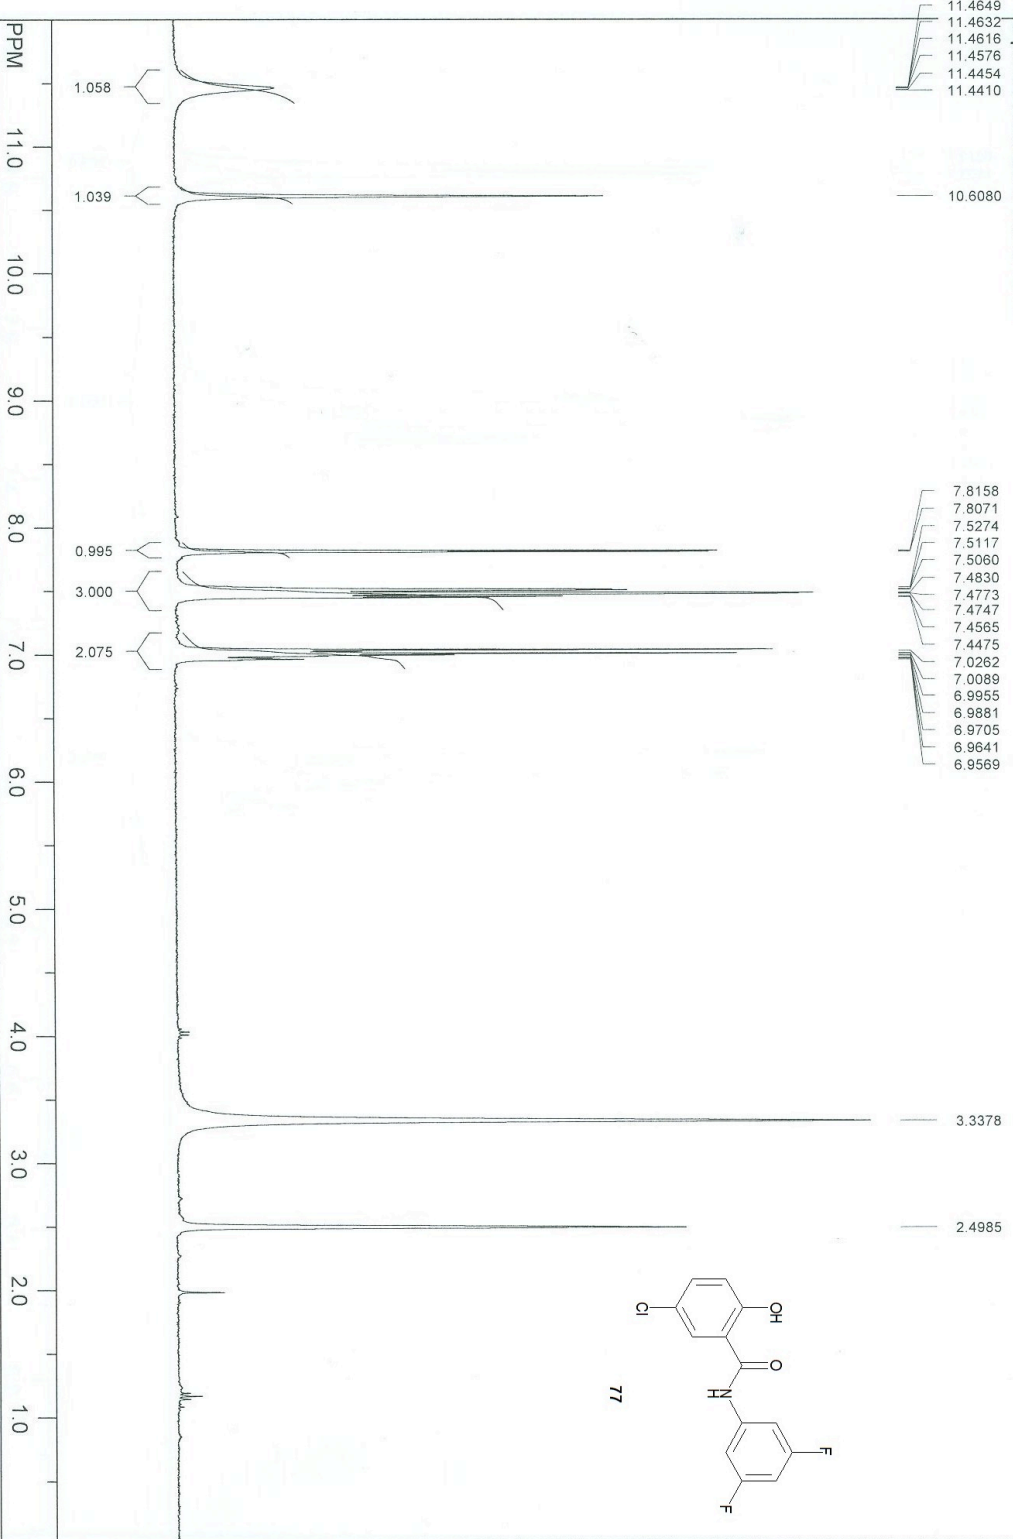

file: C:\min\KRT1042.fid block# 1 exp: "s2pul"  
transmitter freq.: 299.950076 MHz  
time domain size: 19698 points  
width: 4807.69 Hz = 16.028308 ppm = 0.244070 Hz/pt  
number of scans: 8

freq. of 0 ppm: 299.948272 MHz  
processed size: 65536 complex points  
LB: 0.200 GB: 0.0000  
Hz/cm: 143.686 ppm/cm: 0.47903

SpinWorks 2.4:

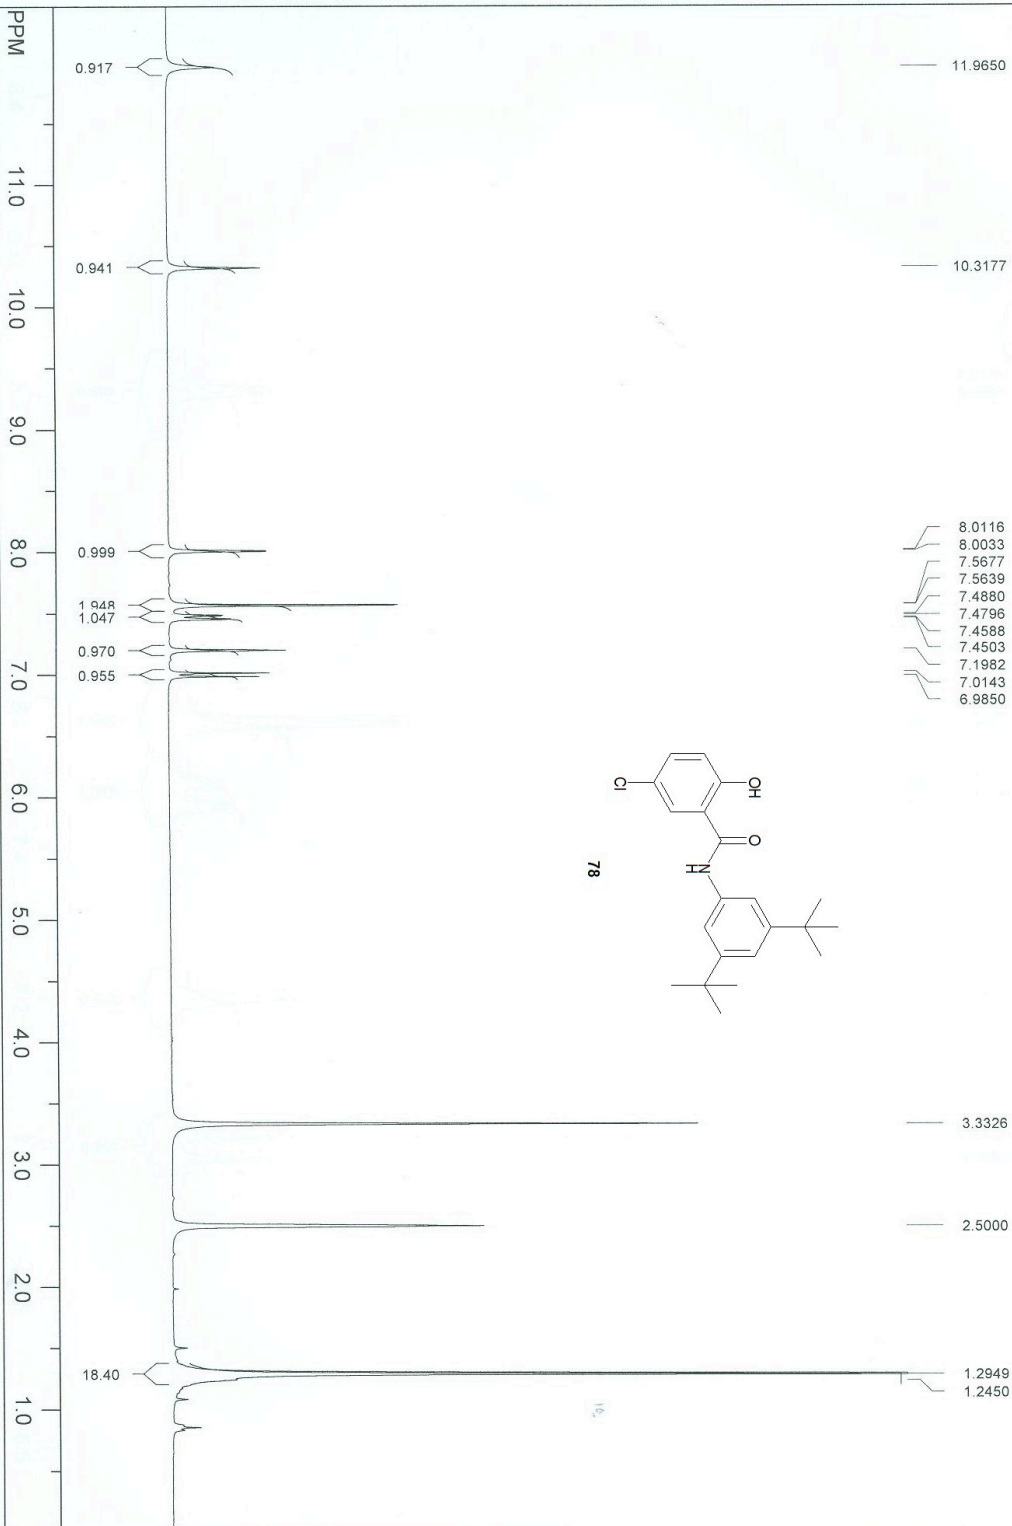

file: C:\min\KRT1806\11\fid exp: <zg30>  
 transmitter freq.: 300.131587 MHz  
 time domain size: 32768 points  
 width: 4496.40 Hz = 14.981438 ppm = 0.137219 Hz/pt  
 number of scans: 32

freq. of 0 ppm: 300.130001 MHz  
 processed size: 16384 complex points  
 LB: 1.000 GB: 0.0000  
 Hz/cm: 149.593 ppm/cm: 0.49842

SpinWorks 2.4: KRT1045

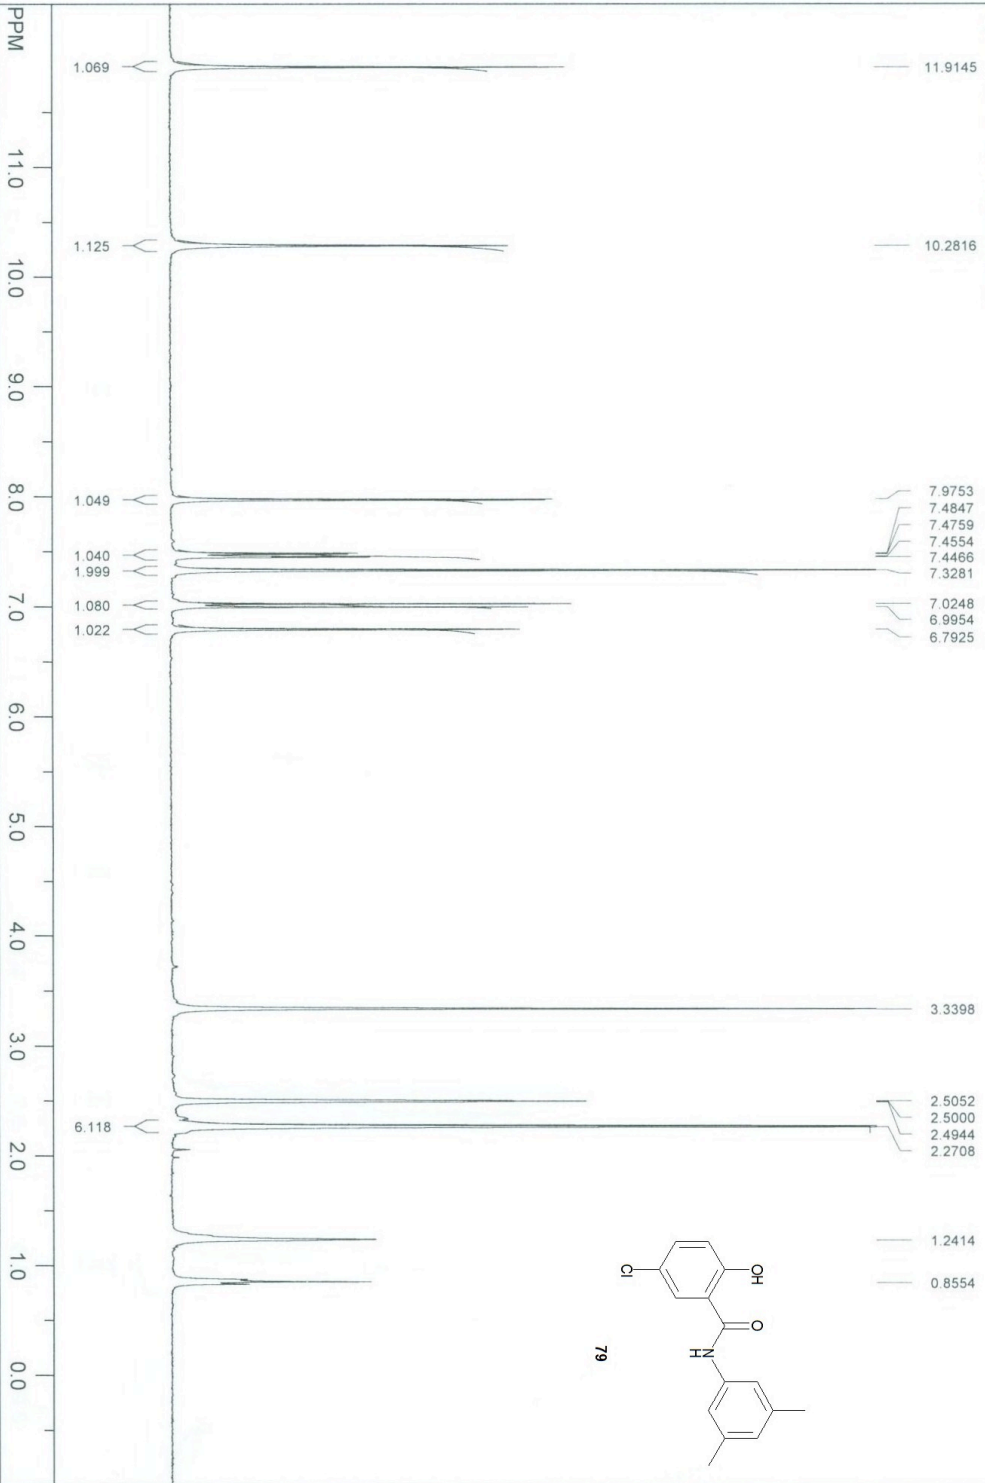

file: C:\PI\KRT1045.fid\data\_block#1 exp1: "s2pu1"  
 transmitter freq.: 299.950076 MHz  
 time domain size: 19698 points  
 width: 4807.69 Hz = 16.028308 ppm = 0.244070 Hz/pt  
 number of scans: 8

freq. of 0 ppm: 299.948280 MHz  
 processed size: 65536 complex points  
 LB: 0.200 GB: 0.0000  
 Hz/cm: 161.961 ppm/cm: 0.53996



SpinWorks 2.4: KRT1850

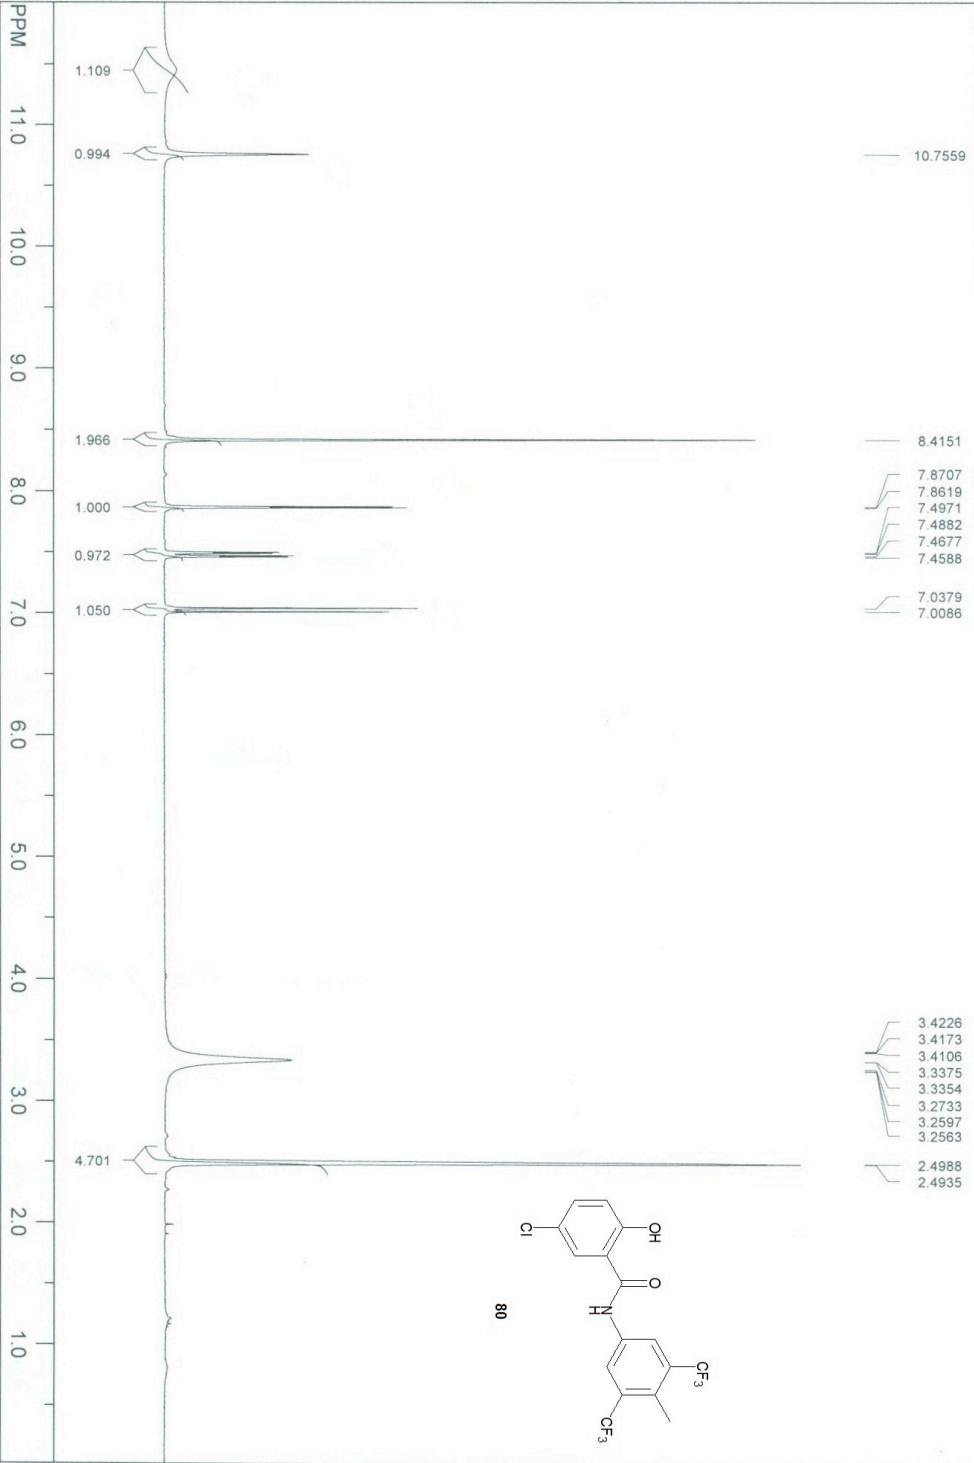

file: D:\민환\민환\NMR\min\KRT1850.fid\fid block# 1 expt: "s2pu"

transmitter freq.: 299.970343 MHz

time domain size: 19698 points

width: 4807.69 Hz = 16.027225 ppm = 0.244070 Hz/pl

number of scans: 8

freq. of 0 ppm: 299.968543 MHz

processed size: 65536 complex points

LB: 0.200 GB: 0.0000

Hz/cm: 143.891 ppm/cm: 0.47969

KRT1852

File: Proton

Pulse Sequence: szpu1

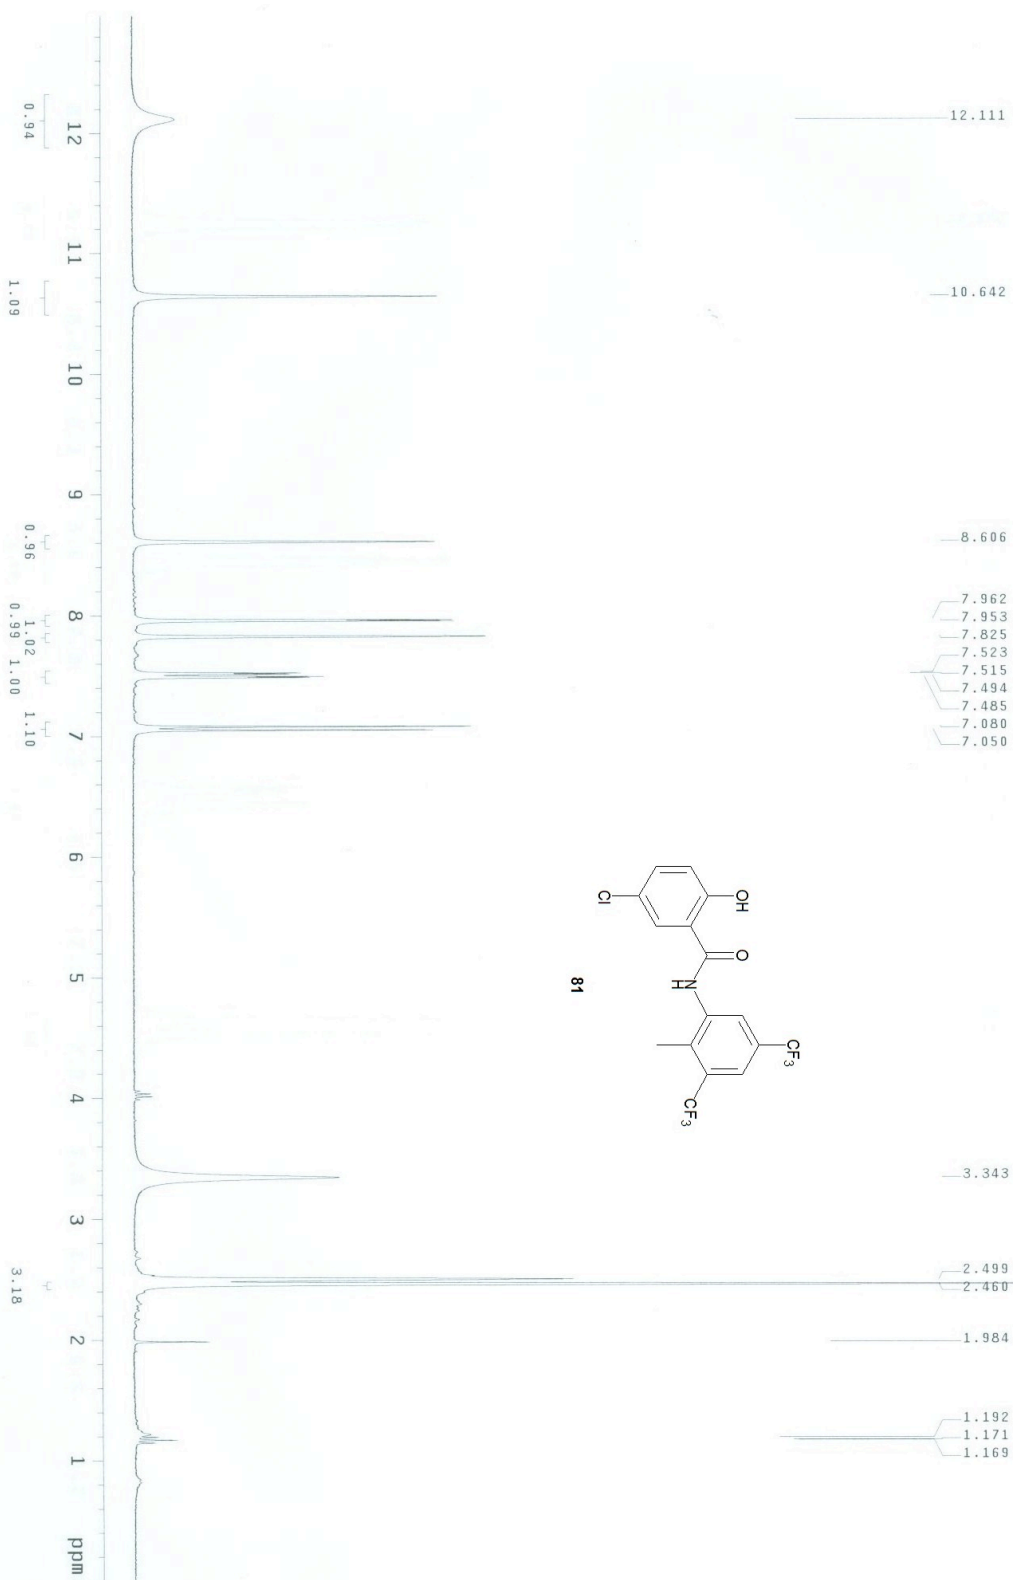

SpinWorks 2.4: KRT1267-4-1-DMSO

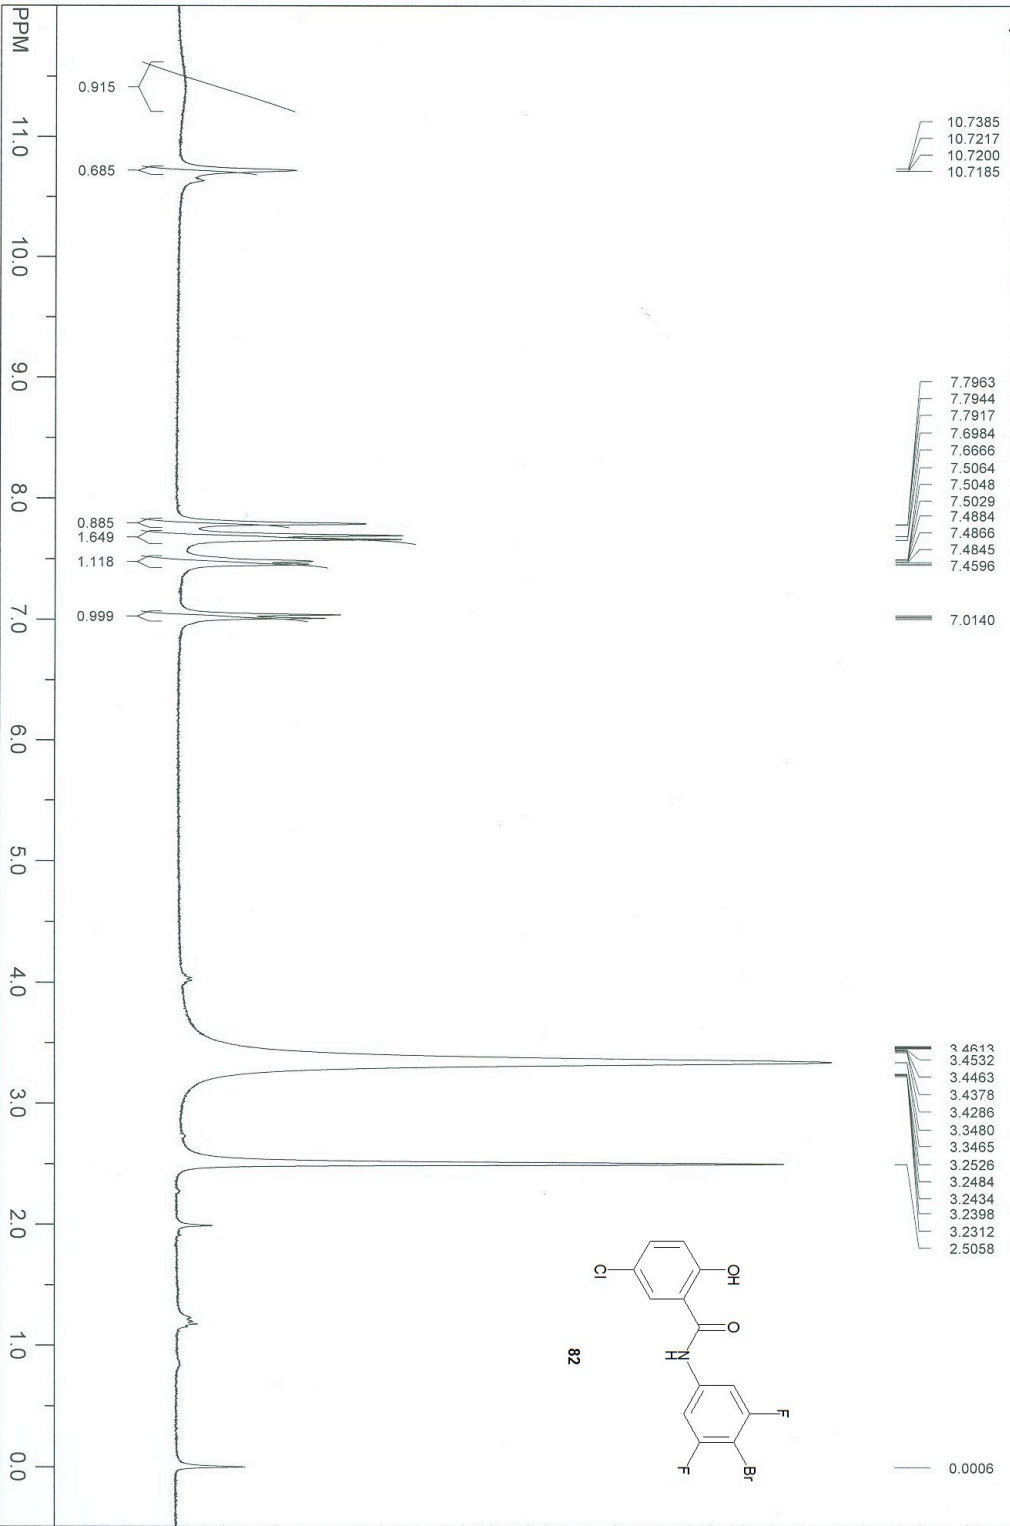

file: C:\Users\윤민준\Desktop\KRT1267-4-1-DMSO-121007.fid\td block# 1 exp: 's2pu'

transmitter freq: 299.970271 MHz

time domain size: 19698 points

width: 4807.69 Hz = 16.027229 ppm = 0.244070 Hz/pt

number of scans: 64

freq. of 0 ppm: 299.968469 MHz

processed size: 65536 complex points

LB: 0.000 GB: 0.0000

Hz/cm: 150.934 ppm/cm: 0.50316

SpinWorks 2.4: N-326

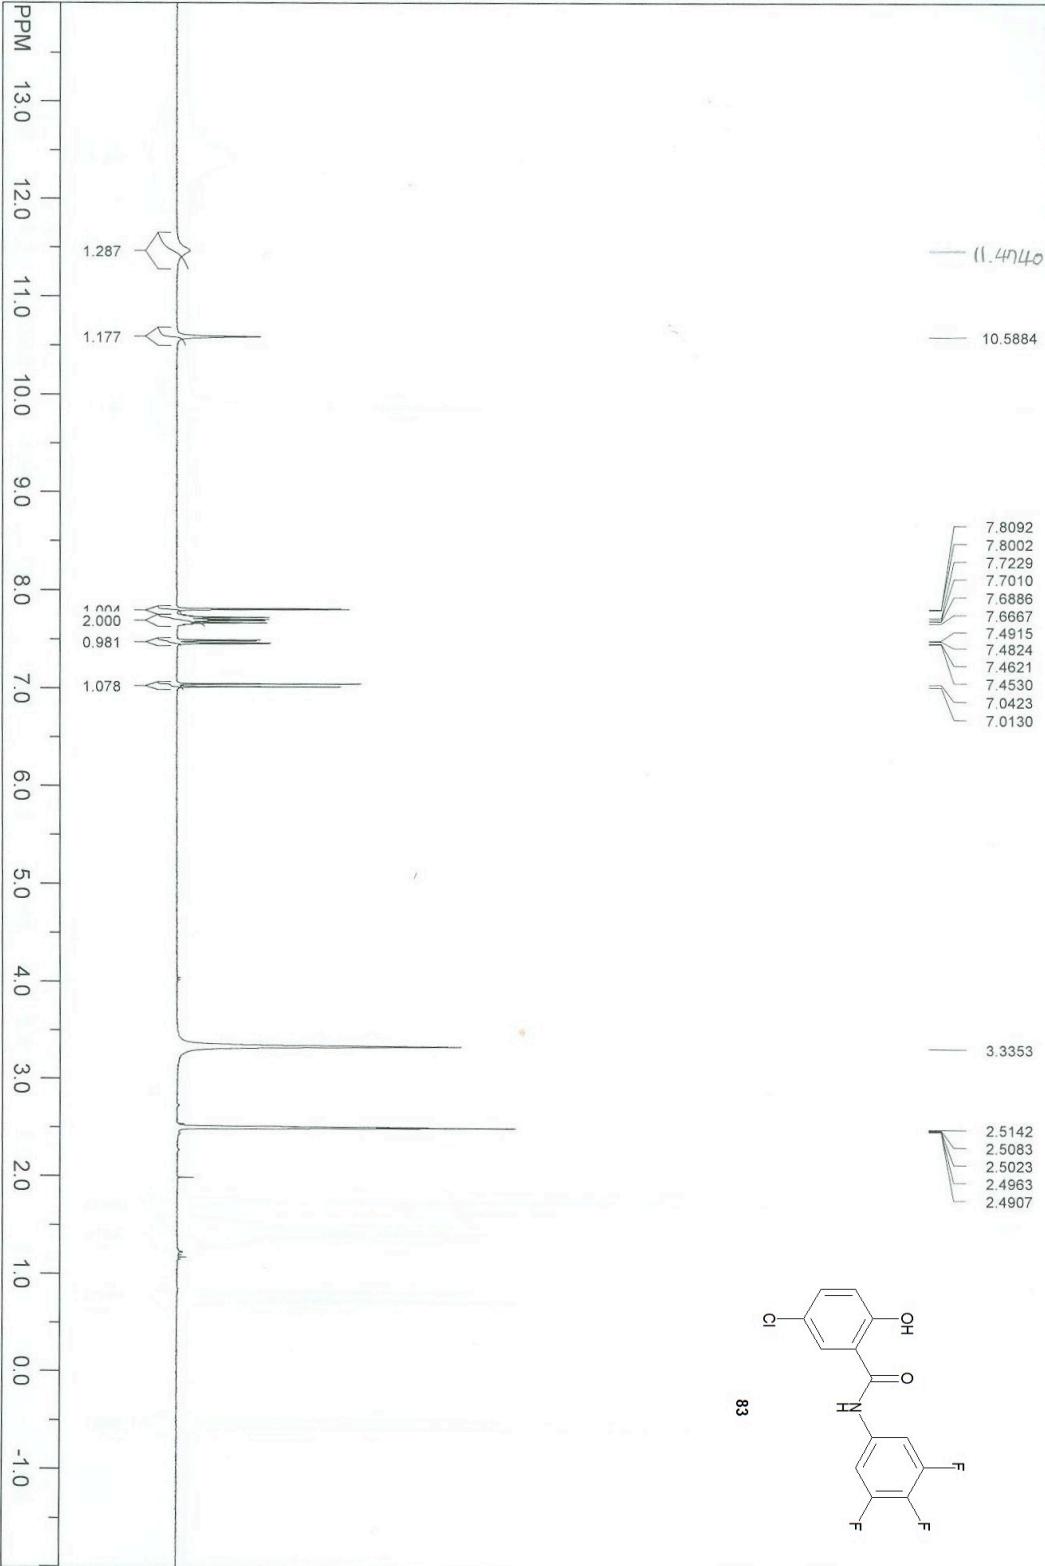

file: D:\남보란\N-326\fid\fid\_block# 1 exp1: "s2pu1"  
 transmitter freq.: 299.970343 MHz  
 time domain size: 19698 points  
 width: 4807.69 Hz = 16.027225 ppm = 0.244070 Hz/pt  
 number of scans: 8

freq. of 0 ppm: 299.968543 MHz  
 processed size: 65536 complex points  
 LB: 0.200 GB: 0.0000  
 Hz/cm: 192.308 ppm/cm: 0.64109

SpinWorks 2.4: N-347

- 11.437
- 10.6757
- 8.0471
- 7.8124
- 7.8041
- 7.4896
- 7.4812
- 7.4606
- 7.4519
- 7.0389
- 7.0095

- 3.3938
- 3.3921
- 3.3743
- 3.3544
- 3.3527
- 3.3509
- 3.3479
- 3.3457
- 3.3439
- 3.3424
- 3.3402
- 3.3385
- 3.3348
- 3.3297
- 3.2957
- 2.5018

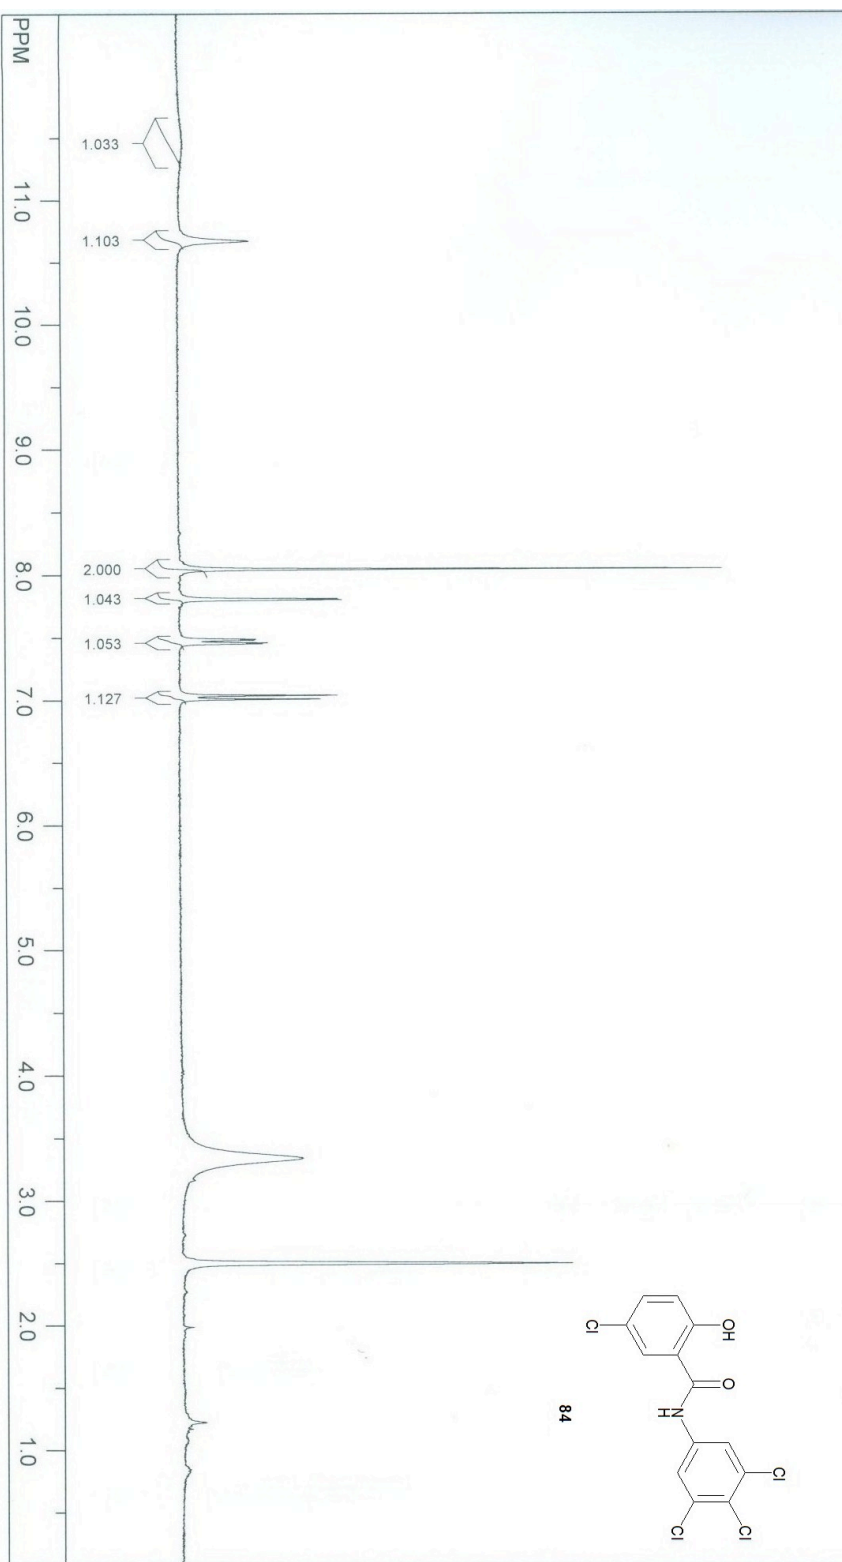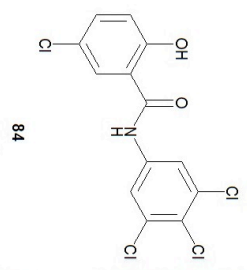

file: D:\남보리\NMR\N-347.fid\fid\_block# 1 exp: "s2pu1"  
transmitter freq.: 299.970343 MHz  
time domain size: 19698 points  
width: 4807.69 Hz = 16.027225 ppm = 0.244070 Hz/pt  
number of scans: 8

freq. of 0 ppm: 299.968543 MHz  
processed size: 65536 complex points  
LB: 0.200 GB: 0.0000  
HZ/cm: 148.869 ppm/cm: 0.49628

SpinWorks 2.4: KRT1815

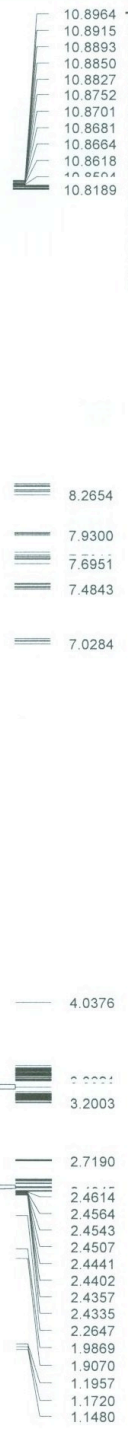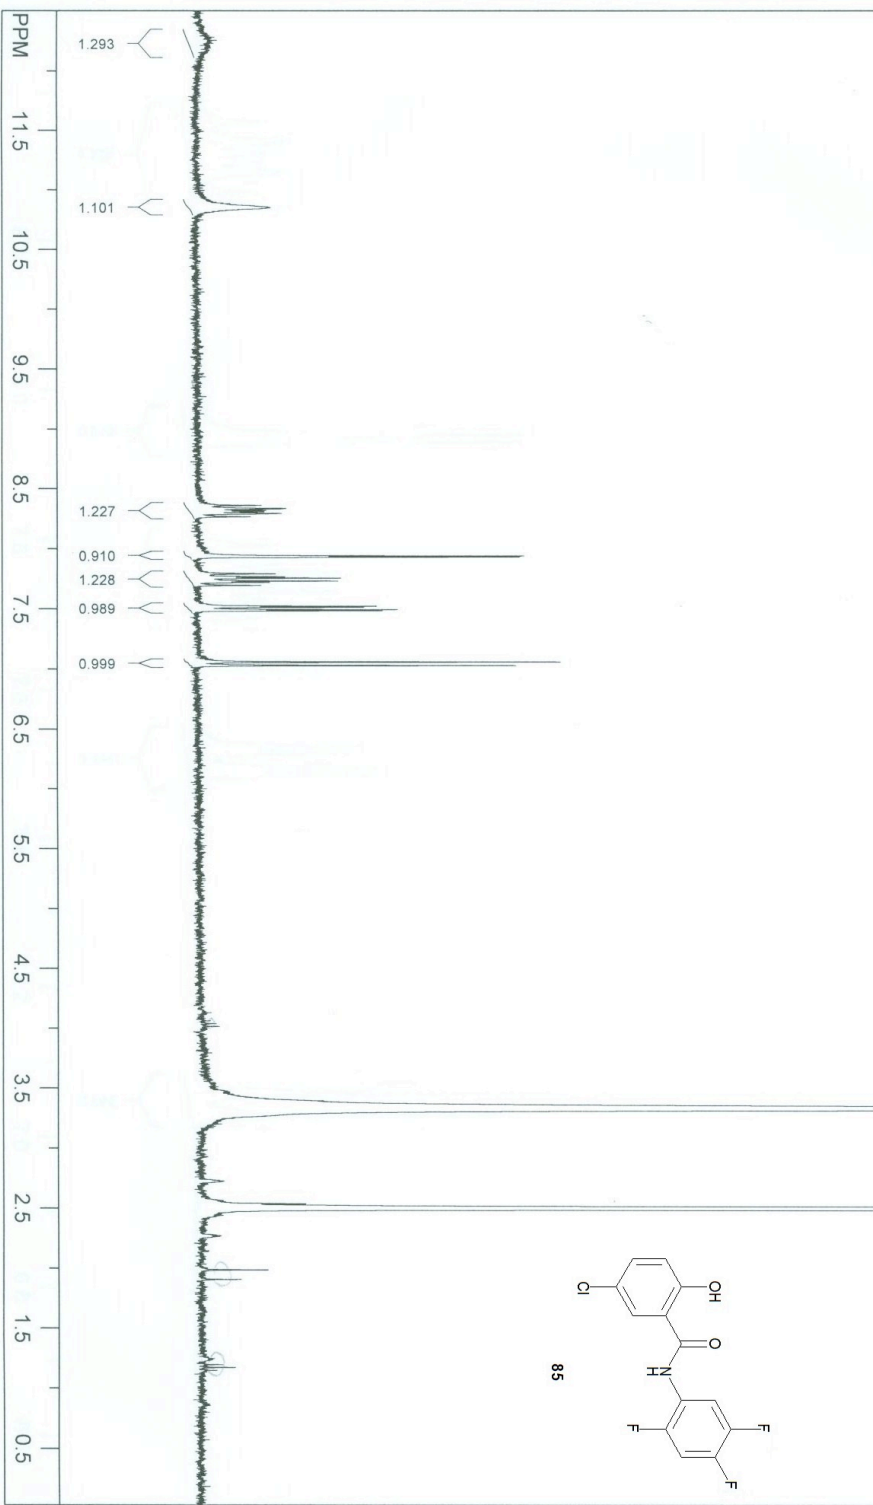

file: C:\민원\KRT1815.fid block# 1 exp: "s2pu"  
 transmitter freq.: 299.970343 MHz  
 time domain size: 19698 points  
 width: 4807.69 Hz = 16.027225 ppm = 0.244070 Hz/pt  
 number of scans: 8

freq. of 0 ppm: 299.968543 MHz  
 processed size: 65536 complex points  
 LB: 0.200 GB: 0.0000  
 Hz/cm: 149.722 ppm/cm: 0.49912

SpinWorks 2.4: KRT1249

12.1394  
12.1360  
12.1311  
12.1277  
12.1243  
12.1217  
12.1173  
12.0840

10.6686

7.8542

7.4993  
7.4122  
7.4012  
7.3850  
7.3528  
7.3265  
7.3224  
7.0629  
7.0336

3.3904  
3.3883  
3.3862  
3.3827  
3.3317  
3.2921  
3.2886  
3.2783  
2.5364  
2.5350  
2.5000  
1.9863

1.1712

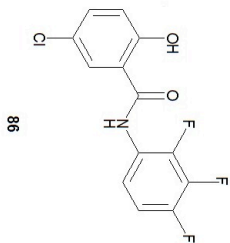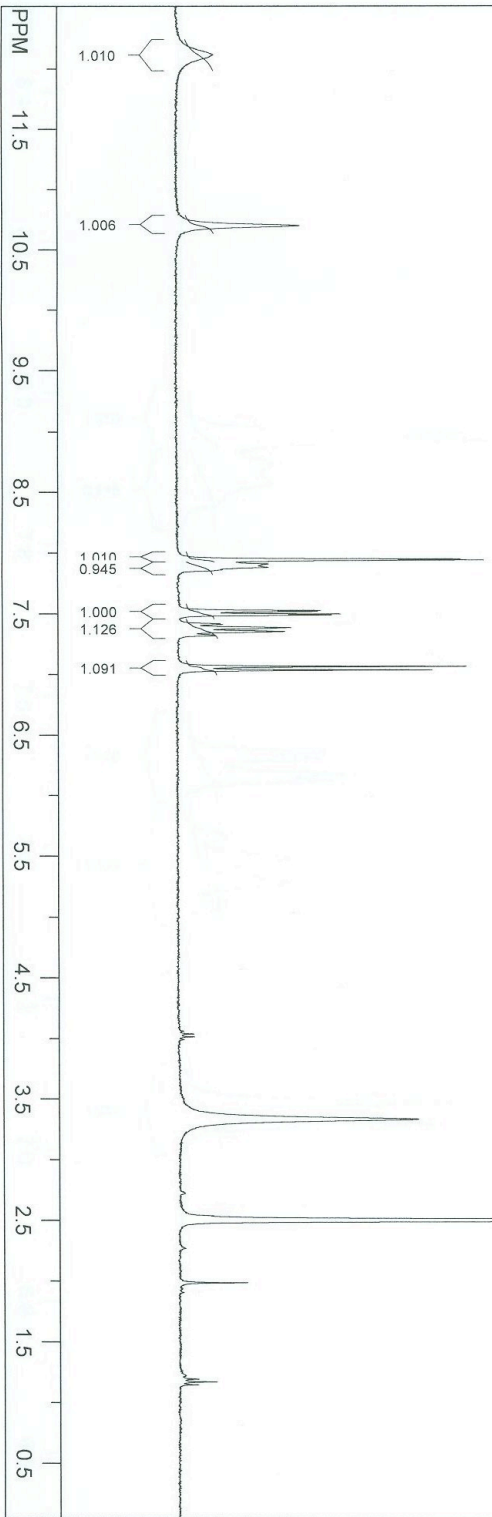

file: C:\M\KRT1249.fid\data\_block# 1 exp: "s2pu"  
transmitter freq.: 299.970343 MHz  
time domain size: 19698 points  
width: 4807.69 Hz = 16.027225 ppm = 0.244070 Hz/pt  
number of scans: 8

freq. of 0 ppm: 299.968543 MHz  
processed size: 65536 complex points  
LB: 0.200 GB: 0.0000  
Hz/cm: 149.722 ppm/cm: 0.49912

SpinWorks 2.4: N-324

12.4925  
11.1977

8.3842  
7.9776  
7.9683  
7.6950  
7.5156  
7.5065  
7.4864  
7.4773  
7.0752  
7.0459

3.8859  
3.3684  
3.3602  
3.3453  
3.3433  
3.3402  
3.3388  
3.3368  
3.3350  
3.3331  
3.3322  
3.3300  
3.3272  
3.3251  
3.3173  
3.3110  
3.3043  
3.2999  
2.5084  
2.5030  
2.4975

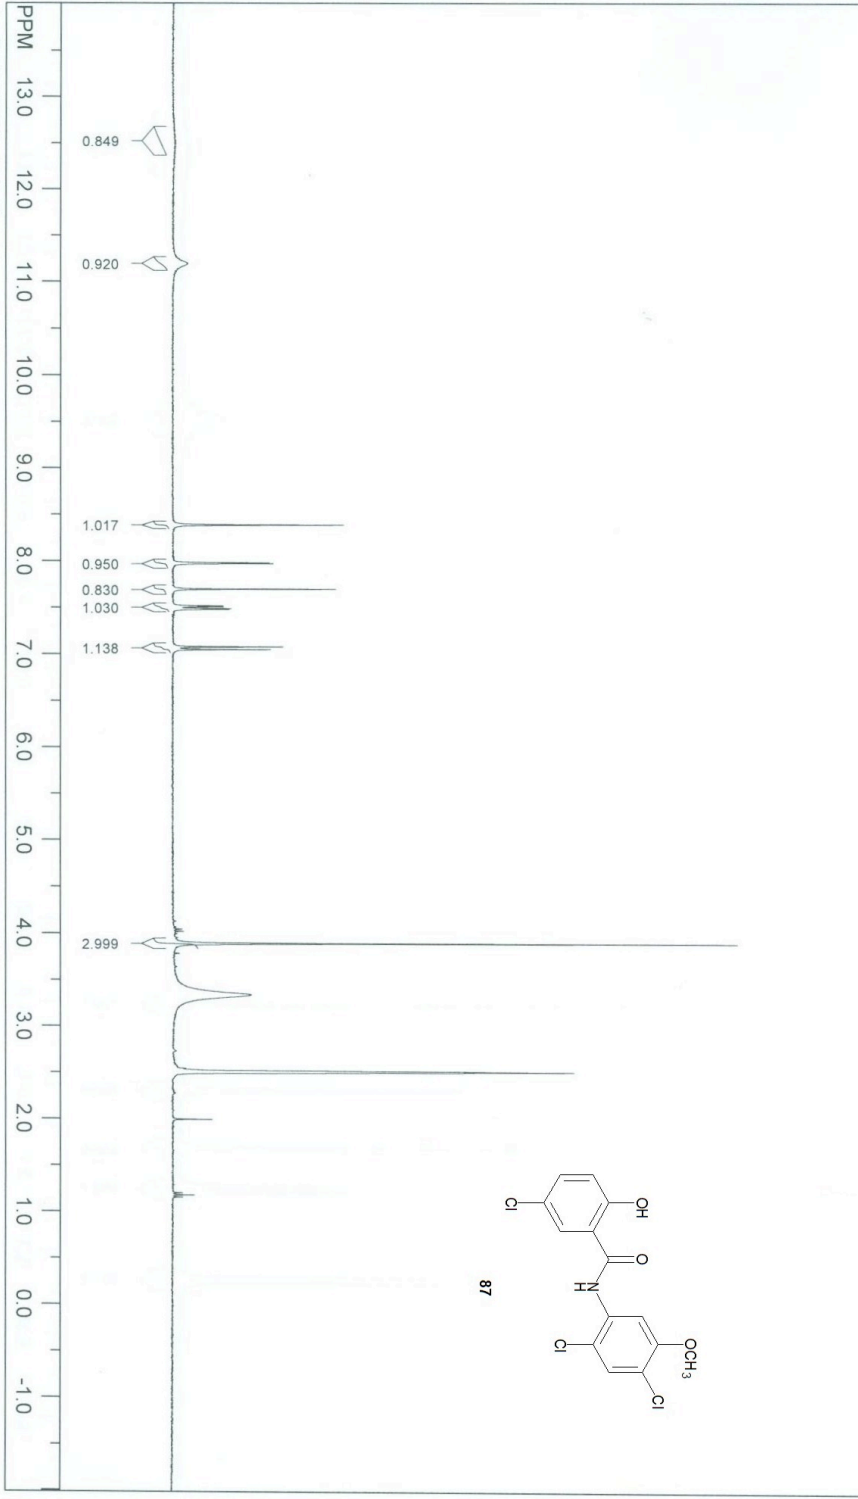

file: D:\남보리\N-324.fid\fid block# 1 exp: "s2pu"

transmitter freq.: 299.970343 MHz

time domain size: 19698 points

width: 4807.69 Hz = 16.027225 ppm = 0.244070 Hz/pt

number of scans: 8

freq. of 0 ppm: 299.968543 MHz

processed size: 65536 complex points

LB: 0.200 GB: 0.0000

Hz/cm: 192.308 ppm/cm: 0.64109



SpinWorks 2.4: N-330

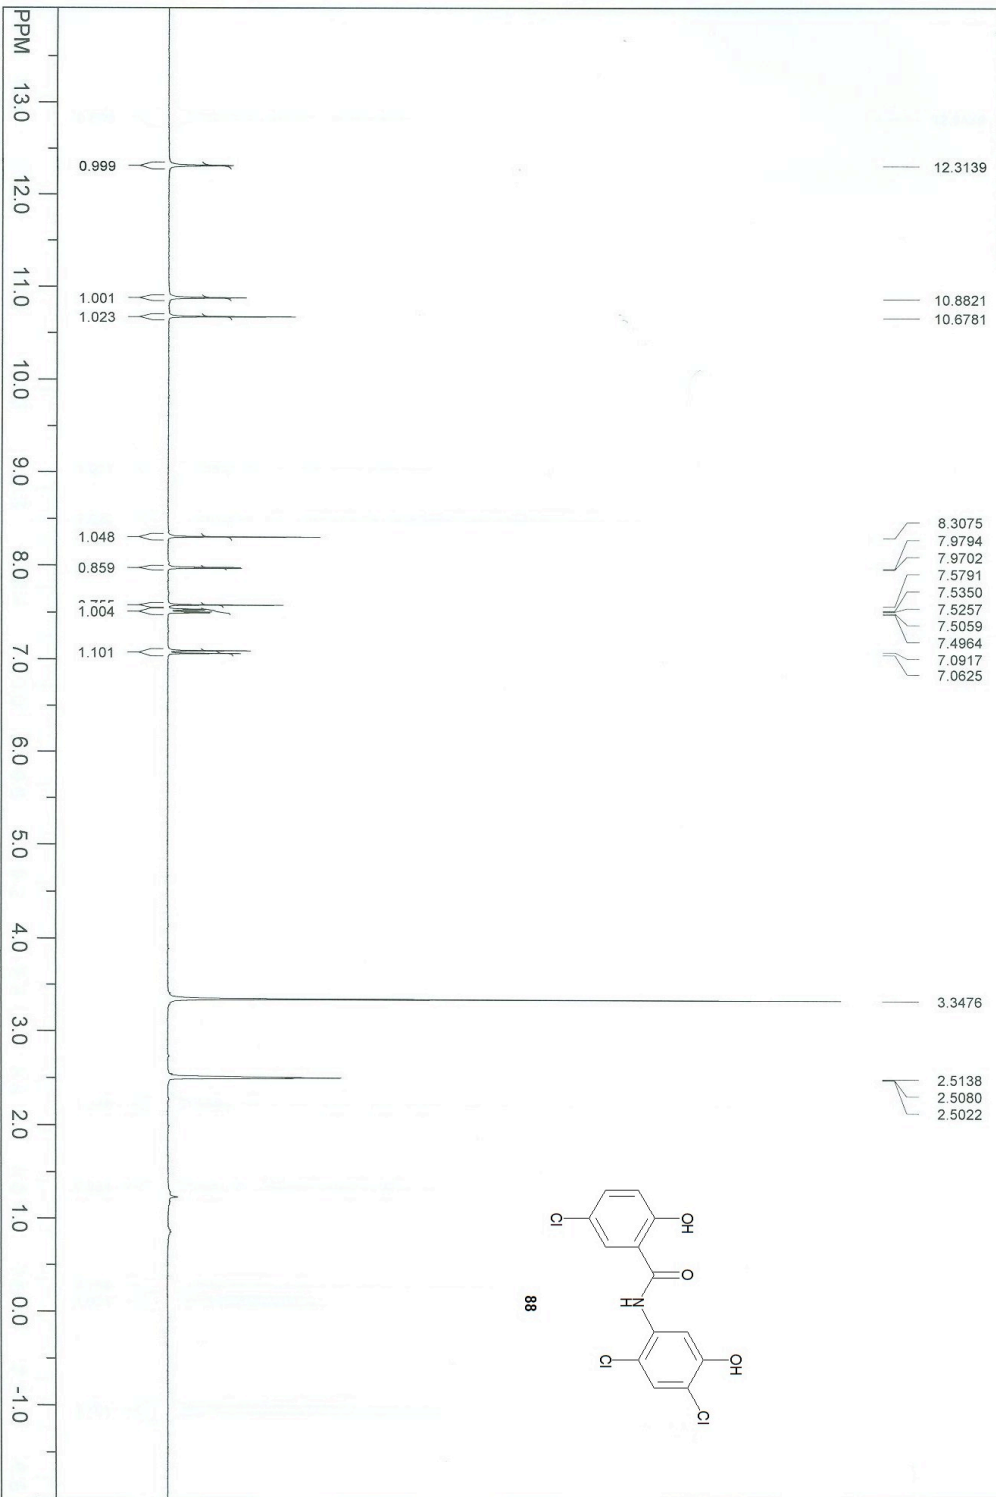

file: C:\Documents and Settings\원국환\연구실\연구원\바탕 화면\NMR-borain-330.fid fid block# 1 expt "szpul" freq. of 0 ppm: 299.968542 MHz  
 processed size: 65536 complex points  
 Transmitter freq.: 299.970343 MHz  
 LB: 0.200 GB: 0.0000  
 time domain size: 19698 points  
 Hz/cm: 192.308 ppm/cm: 0.64109  
 width: 4807.69 Hz = 16.027225 ppm = 0.244070 Hz/pt  
 number of scans: 8

SpinWorks 2.4: N-333

- II .2363
- 10.7086
- 10.7063
- 8.2811
- 7.7216
- 7.6634
- 7.6527
- 7.6320
- 7.6213
- 7.3608
- 7.3502
- 7.3316
- 7.3267
- 7.3205
- 7.3041
- 7.0492
- 7.0427
- 7.0340
- 7.0265
- 7.0192
- 7.0038
- 3.3329
- 2.5139
- 2.5083
- 2.5024
- 2.4965

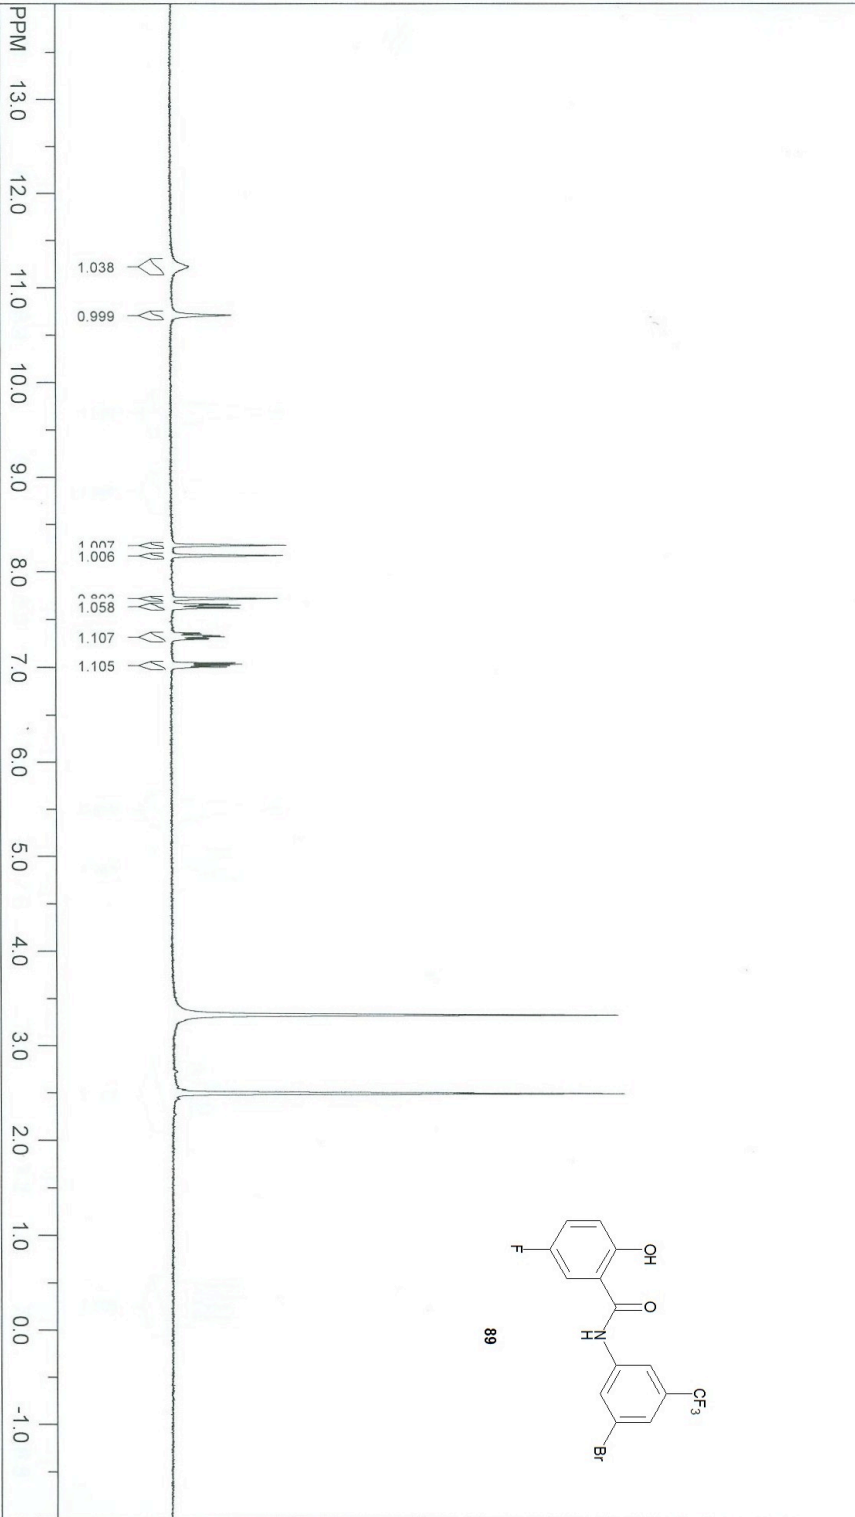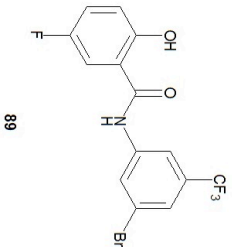

file: D:\남보리\NMR\N-339.fid\fid block# 1 exp1: "2pu1"

transmitter freq.: 299.970343 MHz

time domain size: 19698 points

width: 4807.69 Hz = 16.027225 ppm = 0.244070 Hz/pt

number of scans: 8

freq. of 0 ppm: 299.966543 MHz

processed size: 65536 complex points

LB: 0.200 GB: 0.0000

Hz/cm: 192.308 ppm/cm: 0.64109

SpinWorks 2.4: KRT1807

12.1750  
12.1732  
12.1683  
12.1650  
12.1611  
12.1581  
12.1552  
12.1528  
12.1493  
12.1476  
12.1172

11.2224

8.9068

7.7267  
7.7261  
7.5301  
7.3414  
7.0524

3.2850  
3.2814  
3.2783  
3.2729  
3.2695  
3.2665  
3.2639  
3.2611  
3.2588  
3.2570  
2.5403  
2.5369  
2.5000

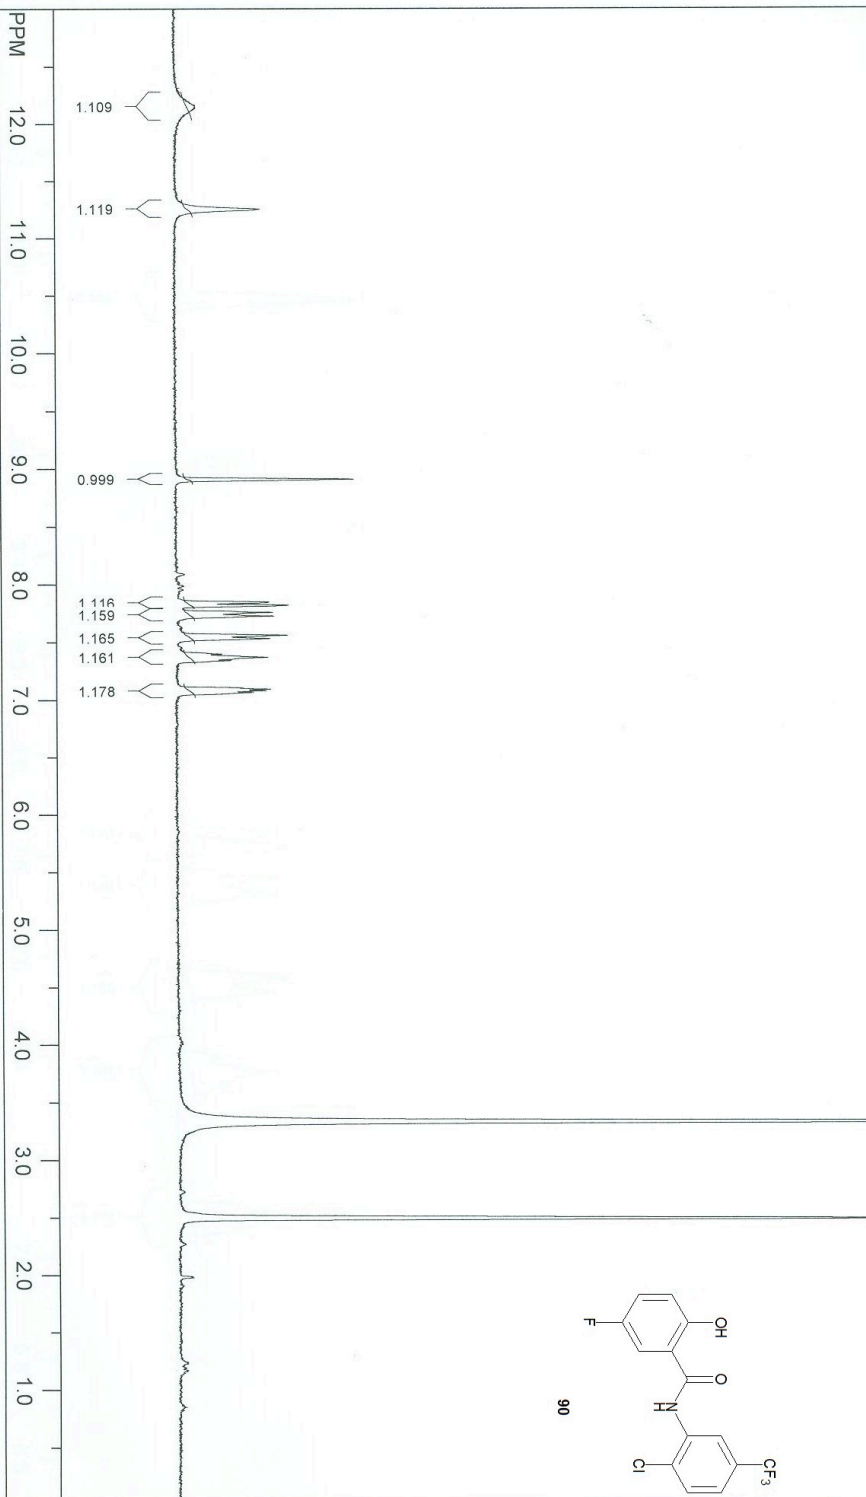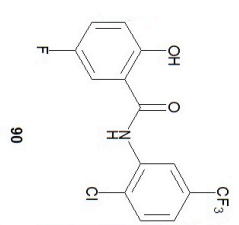

file: C:\min\KRT1807\fid\fid\_block# 1 exp1 "s2pu"  
transmitter freq.: 299.970343 MHz  
time domain size: 19698 points  
width: 4807.69 Hz = 16.027225 ppm = 0.244070 Hz/pt  
number of scans: 8

freq. of 0 ppm: 299.968632 MHz  
processed size: 66536 complex points  
LB: 0.200 GB: 0.0000  
Hz/cm: 155.925 ppm/cm: 0.51980

SpinWorks 2.4: KRT1808

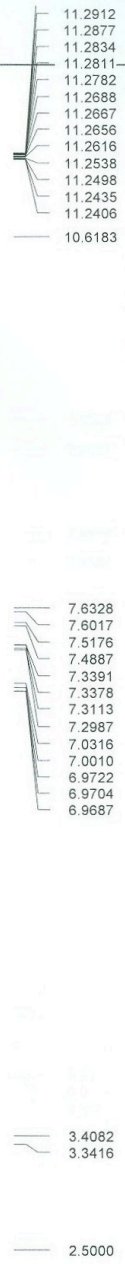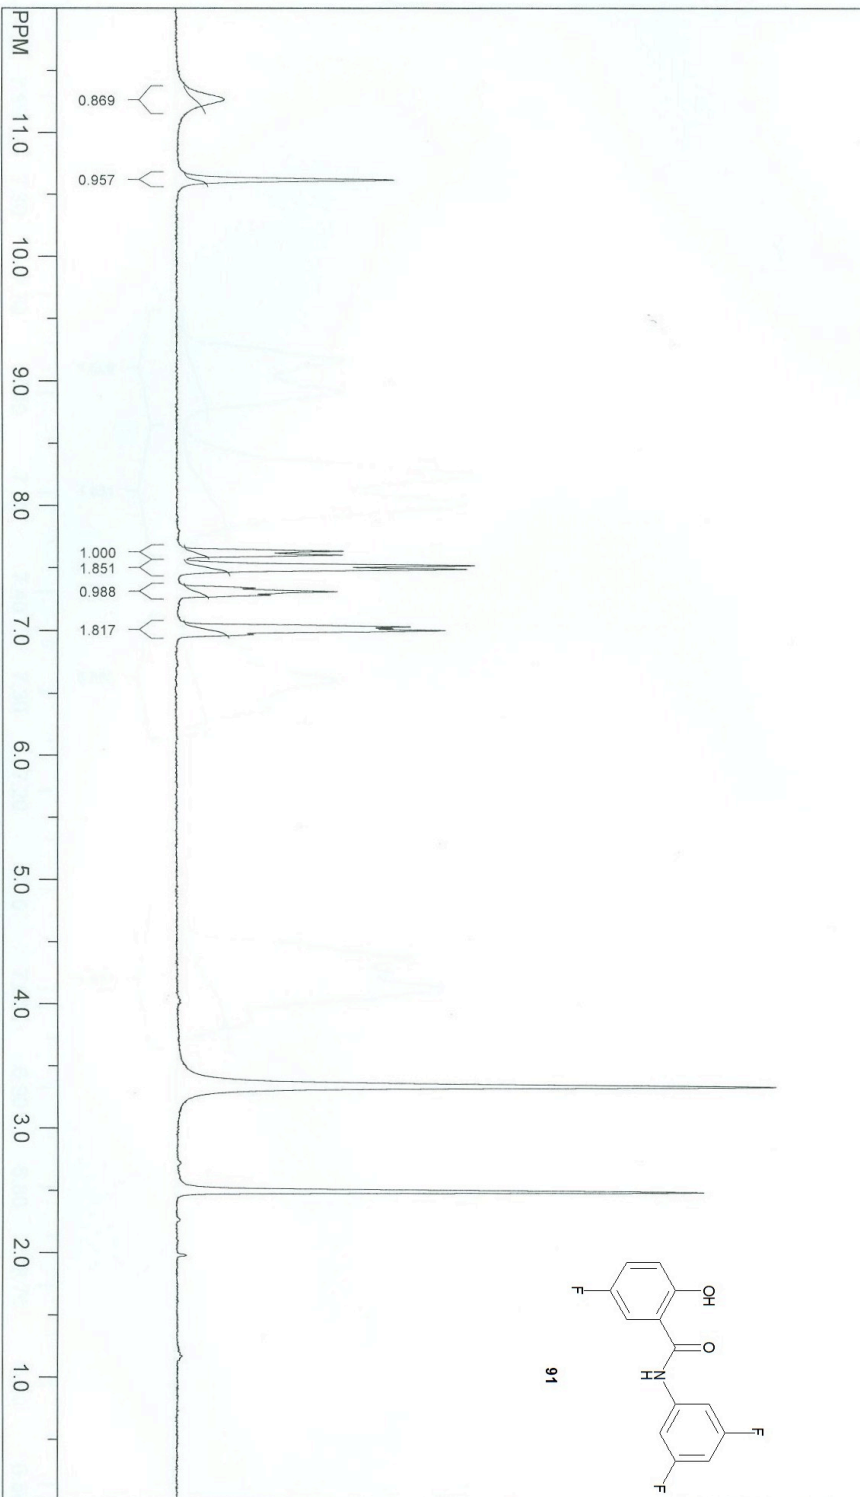

file: C:\만\KRT1808.fid\fid block# 1 expt. "s2pu1"  
 transmitter freq.: 299.970343 MHz  
 time domain size: 19698 points  
 width: 4807.69 Hz = 16.027225 ppm = 0.244070 Hz/pt  
 number of scans: 8

freq. of 0 ppm: 299.968639 MHz  
 processed size: 65536 complex points  
 LB: 0.200 GB: 0.0000  
 Hz/cm: 144.189 ppm/cm: 0.48068

SpinWorks 2.4: KRT1809

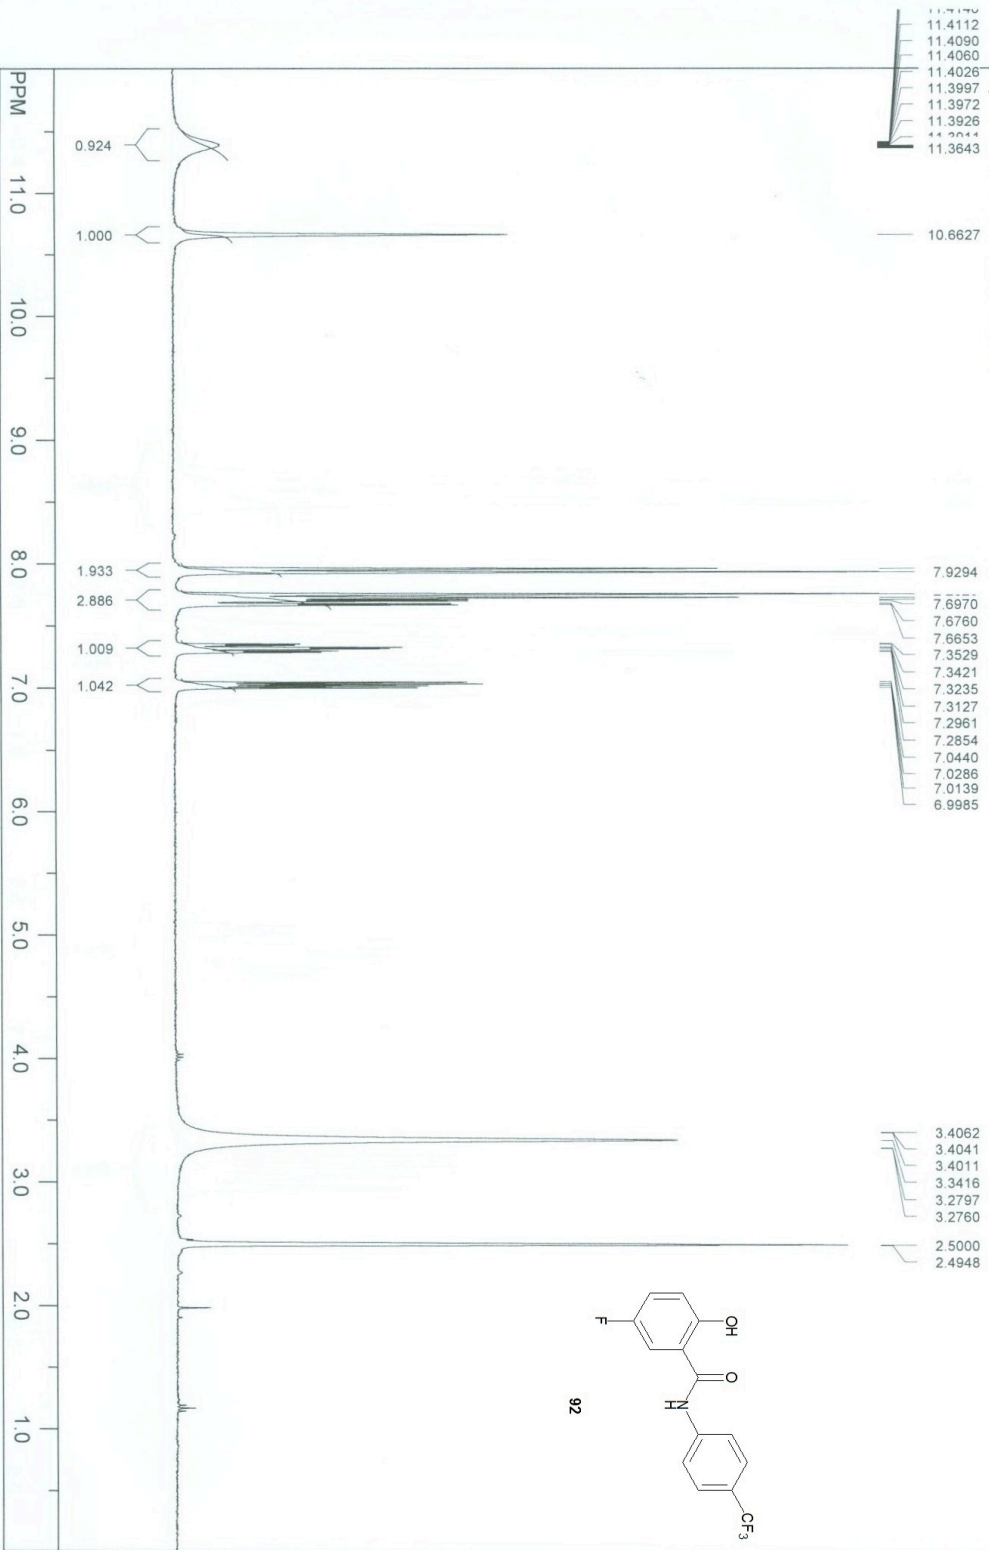

SpinWorks 2.4: KRT1810

12.0174  
12.0156  
12.0094  
12.0077  
12.0044  
12.0024

10.9989  
10.9973

8.7591  
8.7349

7.7452  
7.7342  
7.7131  
7.7022  
7.5997  
7.5810  
7.3944  
7.3835  
7.3651  
7.3543  
7.3385  
7.3274  
7.0821  
7.0670  
7.0523  
7.0370

3.3385

2.5055  
2.5000  
2.4946  
1.9860

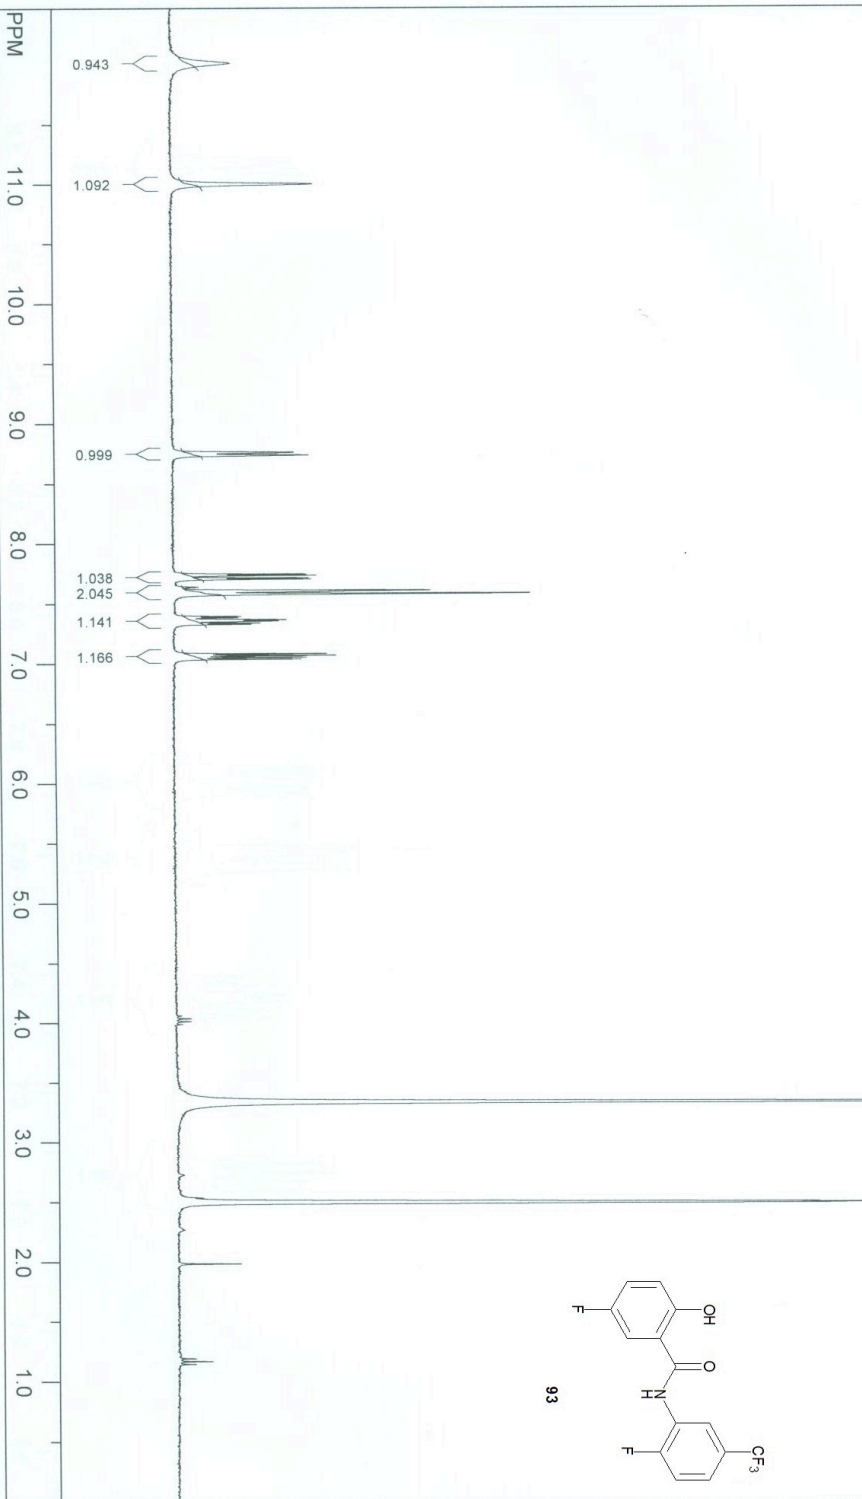

file: C:\min\KRT1810\fid\fid block# 1 expt: "s2pu1"  
transmitter freq.: 299.970343 MHz  
time domain size: 19698 points  
width: 4807.69 Hz = 16.027225 ppm = 0.244070 Hz/pt  
number of scans: 8

freq. of 0 ppm: 299.968544 MHz  
processed size: 65536 complex points  
LB: 0.200 GB: 0.0000  
Hz/cm: 149.722 ppm/cm: 0.49912

SpinWorks 2.4: KRT1811

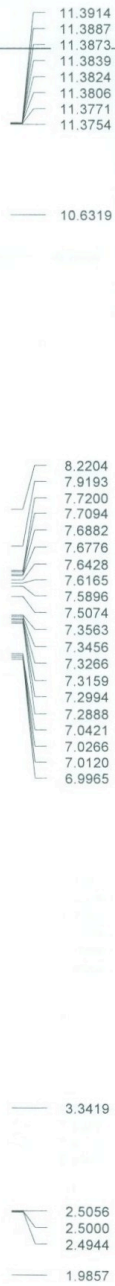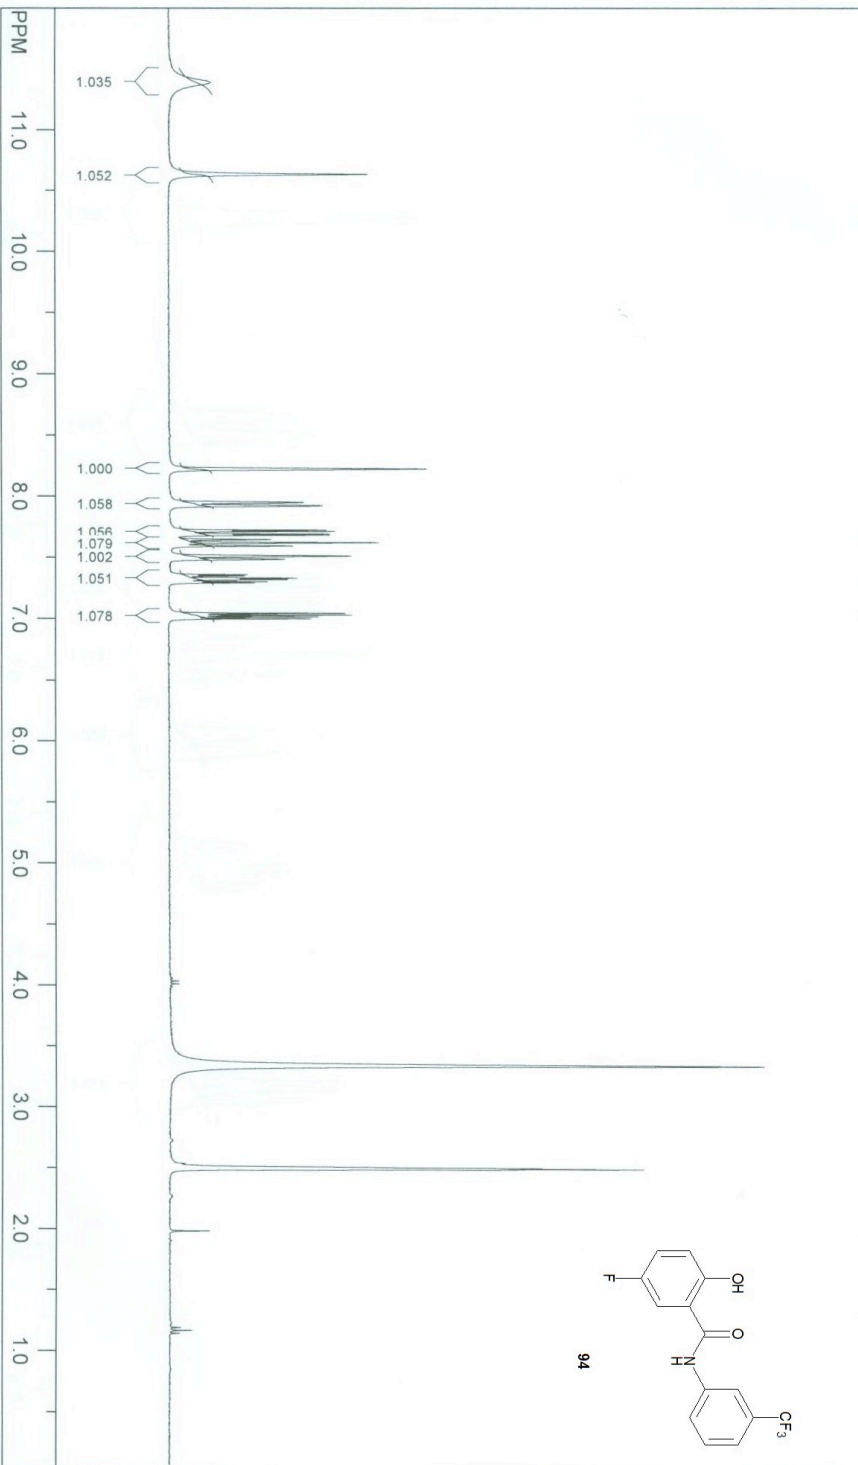

file: C:\민원\KRT1811.fid\fid block# 1 exp\ "szpul"  
 transmitter freq.: 299.970343 MHz  
 time domain size: 19698 points  
 width: 4807.69 Hz = 16.027225 ppm = 0.244070 Hz/pt  
 number of scans: 8

freq. of 0 ppm: 299.968544 MHz  
 processed size: 65536 complex points  
 LB: 0.200 GB: 0.0000  
 Hz/cm: 143.686 ppm/cm: 0.47900
